# Supplementary material for: Evolution of Vertebrate Phototransduction: Cascade Activation
Source: PubMed Central journal article supplement — Mol Biol Evol. 2016 May 11;33(8):2064–87. doi: 10.1093/molbev/msw095 (PMC4948711; doi:10.1093/molbev/msw095), 2016-05-11
Supplement: supp_msw095_File_1_NT_CDS_sequences_fasta.pdf [file supp_msw095_File_1_NT_CDS_sequences_fasta.pdf]

>KT749668\_Rh1\_E.\_cirrhatus\_142849-3-2

ATGAACGGCACGGAGGGATCAAACCTTCTACGTACCAATGAGCAACAAGACGGGGGTCGTGCGAAGCC  
CCTTTCTTTACCCGCAGTTCTACTTGGCCGAACCATGGAAGTACTCGGCTCTGGCTGCGTACATGTTCTT  
CCTCATCGTCACCGGTTTCCCCGTCAACTTCTTGACGCTCTTCGTGACTATCCAGCACAAGAAGTTACG  
GACGGCACTCAACTACATCCTCCTCAACTTGGCAACGGCGAACCTCTTAATGATCGTGTGTTGGCTTCAC  
TACGACCATGTACTCCTCCATGAATGGCTACTTTCGTGTTTCGGAACCACCATGTGCTACTTCGAGGGATT  
CTTCGCCACATTTGGAGGTGAGATGGCGCTGTGGTCCCTCGTGGTCCCTGGCTGTGGAGCGTTACATTGT  
GATTTGCAAACCAATGGGTAATTTTCGGTTTGGCACATCGCACGCACTCATTGGAGTCTCCTTTACTTG  
GATAATGGCACTGTGATGTTGTGCTCCCCGATTTTCGGTTGGTCAAGGTACATCCCAGAAGGTATGCA  
GTGTTCCCTGTGGACCTGACTACTACACATTGAACCCAAAGTATAACAACCTTCAGCTTTGTCATCTACAT  
GTTACAGTGCATTTCTCAATCCCCCTCACCATCATTTTCTTCTGCTACGGCCGGTTGCTGTGCGCTGTT  
AAGGAGGCAGCAGCAGCACAGCAGGAGTCCGCGACCACGCAGAAAGCGGAGAAAGAGGTAACCCGC  
ATGGTGGTTATCATGGTGGTTGGGTTTCTCATCTGCTGGTTACCGTACGCATCAGTGGCCGCGTACATA  
TTTACGCACCAAGGTGCAGACTTTGGCGCCATCTTCATGACCATAACCCTCCTTCTTCGCCAAGAGTTCA  
GCTCTTTACAACCCTGTCATTTATATCTTCATGAACAAACAGTTCCGCCAATGCATGGTCACCACGCTG  
TTTTGTGGAAAGAATCCTTTTCGAAGACGAGGAGTCTGGCACGAGCCAGACCAAGACCGAGGTGTCCTC  
GGTCTCCACCACGCAAGTGTCTCCTGCGTGA

>KT749669\_Rh1\_G.\_australis\_59018-4-1+5-3

ATGAACGGCACAGAGGGGCAGAACTTCTACATCCCGTTCTCAAACAAGACAGGGCGTGGCTCGCAGTCC  
TTTCGAGTACCCGCAGTACTACCTGGCCGAGCCATGGAAGTTCTCGGCTCTGGCTGCCTACATGTTCTT  
CCTCATCCTCGTGGGCTTCCCCGTCAACTTCCCTCACGCTGTTTCGTACGGTGCAGCACAAGAAGCTGAG  
GACGCCGCTCAACTACATCCTGCTCAACCTGGCGGTGTCGAACCTCTTCATGATCCTCTTCGGCTTCAC  
CACCACCATGTACACCTCCATGAACGGTACTTCGTCTTCGGACCCACCATGTGCTCCATCGAGGGCTT  
CTTCGCCACCCTGGGCGGC  
GAGGTGTCTCTGTTCCCTCGTGGTGTGCTGGCCATTGAGCGCTACATCGTCATCTGCAAACCCATGGGC  
AACTTTCGTTTCGGCAACACGCACGCCATCATGGGTGTAGCGTTGACCTGGGTGCATGGCCCTGTCCTGC  
GCCGCTCCGCCACTCCTCGGCTGGTCCAGGTACTTGCCGGAGGGAATGCAGTGTCTCCTGCGGGCCCGA  
CTACTACACCATGAACCCACCTACAACAACGAGTCGTTTCGTATCTACATGTTTCATCGTTCACTTCAC  
GATTCCTTTCGTGATCATATTTTCTCCTACGGGCGCCTGCTGTGCACGGTCAAGGAGGCGGCTGCGGC  
CCAGCAAGAGTCGGCATCGACGCAGAAGGCCGAGAAGGAGGTGACGCGCATGGTGGTGTGCTGATGGTG  
GTGGGCTTCTCGTGTGCTGGGTGCCCTACGCCTCCGTGGCGTTCTACATCTTCACGAACCAGGGCTCC  
GACTTCGGCGCCACCTTCATGACCCTGCCGGCCTTCTTTGCCAAGAGCTCGGCCCTTACAACCCGGTC  
ATCTACATCCTCATGAACAAGCAGTTCCGCAACTGCATGATCACCACGCTGTGCTGCGGCAAGAACC  
TCTGGGCGACGACACTCTGGAGCGTCTACGAGCAAGACGGAGGTCTCCTCGGTGTCCACCAGCCAGG  
TGGCCCCGGCCTGA

>KT749670\_GEOAU\_c59018\_g4\_i1

ATGAACGGCACAGAGGGGCAGAACTTCTACATCCCGTTCTCAAACAAGACAGGGCGTGGCTCGCAGTCC  
TTTCGAGTACCCGCAGTACTACCTGGCCGAGCCATGGAAGTTCTCGGCTCTGGCTGCCTACATGTTCTT  
CCTCATCCTCGTGGGCTTCCCCGTCAACTTCCCTCACGCTGTTTCGTACGGTGCAGCACAAGAAGCTGAG  
GACGCCGCTCAACTACATCCTGCTCAACCTGGCGGTGTCGAACCTCTTCATGATCCTCTTCGGCTTCAC  
CACCACCATGTACACCTCCATGAACGGTACTTCGTCTTCGGACCCACCATGTGCTCCATCGAGGGCTT  
CTTCGCCACCCTGGGCGGC

>KT749671\_GEOAU\_c59018\_g5\_i3

GCCACCCTGGGCGGCGAGGTGTCTCTCTGGTCCCTCGTGGTGTGCTGGCCATTGAGCGCTACATCGTCATC  
TGCAAACCCATGGGCAACTTTCGCTTCGGCAACACGCACGCCATCATGGGTGTAGCGTTGACCTGGGT  
CATGGCCCTGTCCTGCGCCGCTCCGCCACTCCTCGGCTGGTCCAGGTACTTGCCGGAGGGAATGCAGT  
GCTCCTGCGGGCCCGACTACTACACCATGAACCCACCTACAACAACGAGTCGTTTCGTATCTACATGT  
TCATCGTTCACTTCACGATTCCTTTCGTGATCATATTTTCTCCTACGGGCGCCTGCTGTGCACGGTCAA  
GGAGGCGGCTGCGGCCAGCAAGAGTCGGCATCGACGCAGAAGGCCGAGAAGGAGGTGACGCGCAT  
GGTGGTGTGATGGTGGTGGGCTTCTCGTGTGCTGGGTGCCCTACGCCTCCGTGGCGTTCTACATCTT  
CACGAACCAGGGCTCCGACTTCGGCGCCACCTTCATGACCCTGCCGGCCTTCTTTGCCAAGAGCTCGGC  
CCTTACAACCCGGTCATCTACATCCTCATGAACAAGCAGTTCCGCAACTGCATGATCACCACGCTGTG  
CTGCGGCAAGAACCCTCTGGGCGACGACACTCTGGAGCGTCTACGAGCAAGACGGAGGTCTCCTCGG  
TGTCACCAGCCAGGTGGCCCCGGCCTGA

>KT749672\_Rh1-Partial\_M.\_mordax\_25773-1-1

TGCGGGCCGGATTACTACACGATGAACCCCGACTTCAACAACGAGTCGTTTCGTCATCTACATGTTTCGTC  
GTACACTTCGTCATCCCTTTTCGTGATCATTTTTCTTCTCCTACGGACGCTTGCTCTGCACAGTCAAGGAGG  
CGGCCGCGGCCAGCAAGAGTCGGCGTCGACGCAGAAGGCCGAGAAAGAGGTGACCCGCATGGTGGT  
ACTGATGGTGGTGGGATTCCCTGGTGTGTTGGGTGCCCTACGCCTCCGTGGCGTTCTACATCTTCACCAA  
CCAGGGGTCCGACTTCGGCGCCACCTTCATGACCGCGCCGGCCTTCTTTGCCAAGAGCTCGTCCCTCTA  
CAACCCGGTTCATCTACATCCTCATGAACAAGCAGTTCCGCAACTGCATGATCACCACGCTGTGCTGCG  
GCAAGAATCCTCTGGGCGACGATGACTCGGGAGCCTCCACGAGCAAGACGGAGGTGTCTCTCGGTGTCC  
ACCAGCCAGGTCTCCCCGGCTTGA

>KT749673\_Rh2\_G.\_australis\_51485-1-2

ATGAACGGAACCGAGGGAGCGAACTTCTACATCCCCTTCCATAACCGGACAGGCGTGGTTCGAAGTCC  
CTACGAATATCCGCAGTACTACCTGGCCGACCCATGGATGTACTCGGCCATCTCGGCCTATATGTTTAC  
GCTCATCCTGATTGGCTTCCCCATCAATTTTCATGACCCTGTTTGTGACCTTCAAGCACAAGAAGCTCCG  
CCAGCCGCTCAACTTTATCCTCGTCAACCTGTGCGTCGCCGATCTCTTAATGATCATGTTTCGGGTTCAC  
CACCACCTTCTACACGGCCATGAACGGCTACTTCGTGTTTCGGCCCCGACGGGATGCAACATCGAAGGCT  
TCTTCGCCACCCTGGGCGGCGAGGTGTGCTGTTGCTGACTCGTGGTGTGTTGCTGGCCATCGAGCGGTACATC  
GTCGTTTGAAGCCCATGGGCAACTTCAGATTCGCGACGACTCACGCGGCCCTCGGAGTGGTCTTTCAC  
CTGGGTGATGGCGAGCGCGTGTGCCGTGCCGCCGCTCGTCCGGTGGTTCGAGGTACATTCCGGAGGGCA  
TGCAGTGTCTTTCGGGCCCGACTACTACACGCTCAACCCCAAGTATTACAACGAGTCGTACGTCATCT  
ACTTGTTCCTGGTCCACTTCTGCTGCCCGTACCATCATATTCTTTCACCTACGGCCGCTTGATCTGCAC  
CGTGAAGGAGGCAGCGGCGCAGCAGCAGGAGTCCGCCAGCACGCAGAAAGCCGAGCGTGAGGTGAC  
CCGGATGGTGTATCATATGGTTCGTTGGCTTCTCGTCTGCTGGGTGCCCTACGCGTCTTTTGCCTTCTAC  
CTTTCATGAACAAGGGCATCCTGTTCTCGGCCACGGCCATGACGGTGGCCGGCGTTTTTCTCCAAGAGC  
TCGGCTCTTACAACCCCATCATCTACGTGCTCTTGAACAACAGTTCCGTACATGCATGGTTCACCACG  
CTATTCTGCGGGAAGAACCCGTTCCGGTGAAGACGACAGCTCGATGGTCTCTACGAGCAAAACAGAGGT  
GTCCTCAGTGTTCATCTAGTCAAGTGTCCCCGTCATAA

>KT749674\_SWS2\_G.\_australis\_38136-2-1+1-1

ATGTATCAGGGAAAGTCGACACAGGTTCGACGATTTACCAGAAGATTTCTACATCCCCATCGCCCTGAA  
CGTGAAAAACATGTCGGAGTTGAGTCCGTTCTGGTCCCCCAAGTCCACCTCGGGGACAGCTTCATTTT  
CTACGGCATGTCGGCCTTCATGCTGTTTCTGGTGTGGCCGGCTTCCCGCTCAACTTCTCACCGTGTTC  
GTCACCATCAAGTACAAGAAGCTGCGCTCGCACCTCAACTACATCCTGGTCAATCTAGCCATCGCCAA  
CCTCATCGTGGTCTGCTGCGGCTCCACCCTGGCTTTCTACAGCTTCATGCACAAGTACTTCATCTTGGGT  
CCCCTCTTCTGCAAGATGGAAGGCTTCACCGCCACCCTCGGAGGGATGCTGAGCCTGTGGTCTTGGCC  
GTGCTGGCGTTTCGAGCGCTGCCTGGTTCATCTGTAAACCGTTTGGAAACATCGCGTTCGGTGGGACTCAC  
GCCTTGATCGGATGCGGTTTTGCTTGGGCGGCTGCGATTGCTGCCTCCACCCTCCGCTGTTTCGGCTGG  
AGCAGATATATACCGGAGGGTCTGCAGTGTTCCTGCGGCCCGGACTGGTACACAACATAACAACAAGTA  
CAACAACGAGTCGTACGTGATGTTTCTTTCATCTTTTGTTCGGGACTCCGTTTACCATCATCATCGTC  
TCCTACAGCAAACCTCATCCTCACCTCCGCGCGGCAGCCGCGCAGCAGGAGTCCGCCAGC  
ACGCAGAAGGCCGAGAAGGAGGTGTCCCGCATGGTGGTTCATCATGGTTCGGGGGGTTTCTCGTCTGCTG  
GTTGCCGTACGCCAGCCTGGCGCTCTGGATAGTCTTCAATCGCGGCTCGCCTTTTACCTGCGCCTCGC  
CACCATTCCGTCAGTCTTACGCAAGGCTTCCACCCTTACAACCCAGTCATCTACATCTTTCTCAACAA  
GCAGTTCCGCTCGTGTATGATGAAGACTATTTTTGTGGGAAGAACCCGCTGGGTGACGATGAGGACG  
CTACATCTACCACACACAGGTGTCATCTGTTTCAACAAGTCAAGTCGCTCCTGCCTGA

>KT749675\_GEOAU\_c38136\_g2\_i1

ATGTATCAGGGAAAGTCGACACAGGTTCGACGATTTACCAGAAGATTTCTACATCCCCATCGCCCTGAA  
CGTGAAAAACATGTCGGAGTTGAGTCCGTTCTGGTCCCCCAAGTCCACCTCGGGGACAGCTTCATTTT  
CTACGGCATGTCGGCCTTCATGCTGTTTCTGGTGTGGCCGGCTTCCCGCTCAACTTCTCACCGTGTTC  
GTCACCATCAAGTACAAGAAGCTGCGCTCGCACCTCAACTACATCCTGGTCAATCTAGCCATCGCCAA  
CCTCATCGTGGTCTGCTGCGGCTCCACCCTGGCTTTCTACAGCTTCATGCACAAGTACTTCATCTTGGGT  
CCCCTCTTCTGCAAGATGGAAGGCTTCACCGCCACCCTCGGAGGGATGCTGAGCCTGTGGTCTTGGCC  
GTGCTGGCGTTTCGAGCGCTGCCTGGTTCATCTGTAAACCGTTTGGAAACATCGCGTTCGGTGGGACTCAC  
GCCTTGATCGGATGCGGTTTTGCTTGGGCGGCTGCGATTGCTGCCTCCACCCTCCGCTGTTTCGGCTGG  
AGCAGATATATACCGGAGGGTCTGCAGTGTTCCTGCGGCCCGGACTGGTACACAACATAACAACAAGTA

CAACAACGAGTCGTACGTGATGTTCTTCTTCATCTTTTGTTCGGGACTCCGTTCCACCATCATCATCGTC  
TCCTACAGCAAACCTCATCCTCACCTCCGCGCGGCAGCCGCGCAGCAGCAGGAGTCCGCCAGC

>KT749676\_GEOAU\_c38136\_g1\_i1

CAGGAGTCCGCCAGCACGCAGAAGGCCGAGAAGGAGGTGTCCCGCATGGTGGTCATCATGGTCCGGGG  
GGTTCCTCGTCTGCTGGTTGCCGTACGCCAGCCTGGCGCTCTGGATAGTCTTCAATCGCGGCTCGCCTT  
TTGACCTGCGCCTCGCCACCATTCCGTCAGTCTTCAGCAAGGCTTCCACCGTCTACAACCCAGTCATCT  
ACATCTTTCTCAACAAGCAGTTCCGCTCGTGTATGATGAAGACTATAATTTTGTGGGAAGAACCCGCTGG  
GTGACGATGAGGACGCTACATCTACCACCACACAGGTGTCATCTGTTTCAACAAGTCAAGTCGCTCCT  
GCCTGA

>KT749677\_SWS1\_G.\_australis\_43779-1-4

ATGTCCGGAGATGAAGAGTTCTACTTGTTCAAAAACATCTCCAAAGTGGGGCCTTGGGATGGCCCGCA  
GTTTCACATTGCCCCGAAATGGGCTTTCTACTTACAAGCCGCGTTCATGGGCTTCGTGTTTCATATGTGG  
CACGCCACTGAATGCCATCGTTCTGGTGGTCACCATTAAATATAAGAAGCTGCGGCAGCCACTCAATT  
ACATATTAGTGAACATATCGGCCGGCAGGTCTCGTGTCTGTCTCTTTTCCATCTCCACGGTGTTCGTGCG  
CAGCATGCAAGGGTATTTCTTCCCTCGGCCCCACGATCTGTGCATTGGAAGCATTCTTTGGCTCGTTGGC  
CGGCTTGGTGACAGGCTGGTCGTTGGCCTTCTGGCAGCTGAGCGATACATCGTCATTTGCAAGCCGTT  
TGGTAATTTTCGCTTTGGCTCCAAACATGCCCTCGTCGCGGTGGGCCTTACCTGGATGCTGGGGCTCAG  
TGTCGCTTTGCCACCTTTCTTCGGATGGAGCAGATACATCCCCGAGGGATTGCAGTGCTCCTGTGGCCC  
TGACTGGTACACGGTGGGGACCAAGTACAAGAGCGAGTACTACACCTACTTCTCTTCGTGTTCTGCTT  
CGTCGTGCCGCTATCAATCATCATTTTCTCCTACGGCAGCCTGCTGGGCACGCTCCGAGCGGTGGCGGC  
GCAGCAGCAGGAGTCAGCGAGTACCCAGAAGGCCGAGAGGGAGGTGTGCGCATGGTGATCATGATG  
GTGGCCTCCTTCTGCACGTGCTACGTGCCTTACGCCGATTGGCCGTGTACATGGTGACGAACCGCGAC  
CACAACATTGACCTTCGCTTCGTACCCGTGCCCGCGTTCTTCTCGAAGGCGTGTGCGGTGTACAACCCA  
TTGATCTACTCCTTCATGAACAAGCAGTTCCGGGCCTGTATCTTGGAGACCGTGTGCGGGGAAGCCCATC  
ACGGACGAGTCCGAGACGTCCAGCAGCCGCACCGAAGTCTCGTCTGTGTCCACCAGCCAAGTGAGCCC  
CGGGTAG

>KT749678\_LWS\_M.\_mordax\_38189-1-1

ATGGCGGCGTCGTGGGAGAGAGCGATGTTCTCGGCTCGTCCGAGACACGACGACGAGGACACGACCA  
GGGAGAGCGTGTTCGTGTACACGAACGAGA ACTTCACGAGAGACCCATTTGAGGGCCCCAACTACCAC  
ATCGCCCCCTCGCTGGATATTTAACCTCGTGTCCGTATTCATGTTAATCGTCGTCGTCGCCTCACTCTTCA  
CCAACGGCCTGGTGCTGGTGGCCACCATGAAGTTCAAGAAGCTCCGGCATCCGCTCAATTGGATTCTT  
GTCAACCTGGCATTGCTGACATCGCAGAGACTATATTCGCCTCGACCGTCAGTGTGAGCAACCAGGT  
CTTTGGATATTTATCCTGGGACACCCAATGTGCGTGTTCGAGGGCTACATTGTGCGCTTGTGCGGCAT  
CTGTGGTCTCTGGTCACTGGCTATCATCTCGTTTGAGCGCTGGATGGTCTGCTGCAAACCCCTTCGGCAA  
CGTCAAGTTTGACGGAAAAATCGCGCTCATCCTCATCATCTTCTCGTGGGTTTGGGCTGCGTTCCTGGTG  
CGCGCCTCCCATATTCGGCTGGAGCAGGTACTGGCCGCACGGCCTGAAGACATCCTGCGGGCCGGATG  
TGTTACGCGGGA ACTCGGACCCGGGGGTACAGTCGTACATGGTGACGCTCATGATTACGTGCTGCTTC  
ATCCCGCTGTCCGTCATTATCATCTGCTACTTCCAAGTCTGGCTCGCCATTACACAGTGGCGCAGCAG  
CAGAAGGAGTCGGAGACGACACAGAAGGCCGAACGCGACGTGTCTCGTATGGTGGTGGTCATGATCA  
TGGCCTACATCTTCTGCTGGGGGCCCTACACCGCGTTCGCGTGTCTTCGCGGCCGCCAACC CGGGCTACG  
CGTTCCACCCGCTCGTCGCGGCGCTACCCTCCTACTTCGCCAAGAGCGCCACCATCTACAACCCCATCA  
TCTACGTCTTCATGAACAGACAGTTCCGCAACTGCATCCTGCAGCTATTCGGCAAGAAGGTGGACGAC  
GGCTCGGAGGTGTCCAGCACGAGCCGCACGGAGGTCTCCTCCGTGTCCA ACTCGTCCGTCAGCCCCGA  
GTGA

>KT749679\_LWS\_G.\_australis\_59018-5-4

ATGGCGCAGTCGTGGGAGCGGGCCATGTTTCGCGGCTCGCAGGAGACAAGACGAGGACACGACGAAGG  
GAGATTTGTTTAGATACACGAATGAAAACAACACGAGAGATCCCTTTGAGGGCCCCAACTACCACATC  
GCCCTCGCTGGATGTACAACCTCACGTCTTTTGGATGATCATCGTCGTCATCCTCTCACTCTTACCA  
ACGGCCTGGTGCTGGTGGCCACCTTAAAGTTCAAGAAGCTCCGGCACCCGCTCAACTGGATCCTCGTC  
AACCTGGCCATCGCTGACATCGGAGAGACCATCTTCGCTTCGACCGTCAGCGTTGTCAACCAGATCTTC  
GGATACTTCATCCTGGGACACCCGCTGTGCGTGTTCGAGGGTTTCACTGTGTCTGTCTGCGGCATCACG  
GCACTCTGGTCGCTGGCTATCATCTCGTTCGAGCGCTGGATGGTCTGTCTGCAAACCCCTTTGGCAATCTC  
AAGTTTGACGGCAAGGTGCGGATCGTCCTCATCATTTTCTCGTGGGCCTGGTCTGCGGGCTGGTGC

CCTCCCATTTTCGGCTGGAGCAGGTA CTGGCCGCACGGCCTCAAGACGTCTGCGGCCCGGATGTATTC  
AGCGGCAGCACCGACCCCGGGGTGCAGTCTACATGGTGGTGTCTCATGATCACCTGCTGCTTCATCCC  
GCTCGCCCTCATCATCATCTGCTACTTGCAAGTCTGGCTCGCCATCCACACCGTGGCGCAGCAACAGAA  
GGAGTCGGAGACGACGCAGAAGGCGGAGCGCGACGTGTCCC GCATGGTGGTGTCTATGATCTTCGCCT  
ACATCTTCTGCTGGGGGCCCTACACCTTCTTTGCGTGTTCGCGGCCGCCAACCCGGGATACGCGTTCC  
ACCCGCTCGCCGCCGCGCTGCCCGCCTACTTCGCCAAGAGCGCCACCATCTACAACCCCATCATCTACG  
TCTTCATGAACAGACAGTTCCGCAACTGCATCATGCAGCTGTTTGGGAAGAAGGTGGACGACGGCTCC  
GAGGTGTGAGCTCTGCCCGCACGGAGGTCTCCTCCGTGTCCA ACTCGTCCGTACGCCCGCGTGA

>KT749680\_Parapinopsin\_G.\_australis\_53253-1-3

ATGTCCATACTGGCGTCCAACACCTCGGACGTGGCGCATCTGCACGGGGTTCGCGAACGTGAGCGGAGC  
CCTGACCCCGATGACCCGCGTCCCGGACGCAGAAGCCAGCTGCGGCGGCGGCGGCCCTCGCTGCCTCGG  
AAGGTCACGCCGGCGTGAAC TTCCACGCACTGTGCGGCGCTCATGGGCATCACGTGCGGTCTGTCCATC  
GTTCTCAACGGGCTGGT GATCGCGGTCACGCTGCGGTCCAAGCTGCTGCGGCAGCCGCTCAACTACGC  
GCTCGTCAACCTGGCCTGCGCCGACCTGGGCATCTCGCTGAGCGGCGGCATCATCACGACGGTCAGCA  
ACGCCAGGGGGAGATTTGACCTGGGACGAGCCGTGTGCGTTCGCGGACGGGTTCTCGTTGCGGTTTTT  
GGCATGACGGCGCTGATCACGGTGTGCGTGTGGCCGTGGAGCGCTACGTGGTGGTGTGCAAGCCTCT  
GGGCGGCGTGCAC TTCAACACGCAGCACGGCATCTGCGGCGTGGCCTTCTCGTGGGCCCTGGGCCCTCC  
TGTGGAGCATGCCGCCGCTCTTCGGATGGGGCCGCTATCACTTCGAGGGCGTGGGCACGTCTGTGCGCT  
CCGGACTGGTCCGACAGTAGCACCTCGGGCCGACGCTACATGACCGCCTACTTCACCTTCTGCTTCACG  
CTGCCCATGCTGATCATCGTGTCTGCTACACCAAGCTGATGAGGGCCATAACAAGGTATCGAAACT  
CGGCTTGAGCGCCAACGACACGGCCGAGAGGAAAGTCGGAATGATGGTGGTGGTGTGATGATTTTTGCCT  
TCTTCTCTGCTGGCTGCCTTACGCCGCGCTGGCCATTGCCACCGTCATCAAGCCAGACCTGAAGGTGT  
CGCCTCTCACCGCTTCTATTCCGGTTTACATGGCCAAGTCAAGTAGTGCTTACAACCCCATCATATACA  
TCTTCATGCATAGACAGTTCCGGGAGCACATCTCACGAATGTGCTGTGGCCAACGCAACCAAGCAGC  
AGAATAACTCCCGAAGAGAACACGATGCAGAGGTTACAGCCCGCTTAA

>KT749681\_Parapinopsin\_G.\_australis\_53253-2-1

ATGGACTCAAACACCAGCATATCCTGATCGGGCGGTGGCAACGGCAGCGTGCTGCTGGAGCCGTCCAG  
CGCGACCCCTCCCGGGCCGCTTTTGTCTCCCTCTCGGTGATCATGGGCATCACGACGTTTCGCCTCGCT  
GCTGCTCAACGGCCTGGTGGTGGTGGCGAGCTTGCGGCACAAGGAGCTGAGGCAGCCGCTCAACACGT  
CGCTGCTCAGCCTGGCGGCCCGCCGACCTCGGCATGGCCCTGGCTGGGGGGCTCCCCAACACCGTGACC  
AACCGCGTGGGGGGCCTGGT CATGGGACGGGCGGGATGCATCACCGAGGGCTTCTCATGTCAATTTT  
CGGCATCGCGGCGCTGGACTCGGTGTGCGTGTGCTGTCGGTGGAGCGCTACGTCTGTTGTGCCGCCCGC  
TGGGCAGCCTGCGCTTACGCCGCGCCACGCCGCCCTCGGCCTGGCCGTGGCCTGGCTGTGGGCCCTC  
GCGTGGACGGTGCCGCCGCTCATGGGCTGGGGTCGATACGGGCCCGAGGGCGTGGGCACGTCTGTGCG  
CGCCGACTGGGCCGACGAGTCGGCGGGCCGGGCGGGCCTACATCCTCTGCTTCTCTGCTTCTGCTTCG  
CGCTGCAGCTGCTCATCATCTTCTGCTACGGCCGCCTCATGATGACCCTGCACCAGGCCCCGAAGC  
TGAGCGGCGGGGCGAGCCAGCGCGCCGAGCGCCAGGTGGGCATCATGGTGGTGTCTCATGGTGTGGC  
CTTCTCTGCTGCTGGACCCCGTACGCCGTCTGCTCCATCGCCGTCGCCGTGACGCCCGGACTCAAGCT  
GAGCCCGCTGCTCGCCACCGTACCGCTCTACGCGGCCAAGTCCAGCACGGCGTACAACCCCGTCATAT  
ACATCATCCTGAACCGCAACTTCCGCTCCATCCTGCGCCAAATGATTTGCGGCAAAGCGGCGGGGGAG  
ACGCGCGCCGAGTCGGAGGCCGTCACCAGGGTGGAGACTCTGCGGGGACCCGAGGAGGGGGGGCGACA  
AGGGTGGCCGACGACGAGGCGGGCGCCCAAGCTACCTCCAGCGTCTAG

>KT749682\_VAL\_G.\_australis\_53322-1-2

ATGGAAGACAACCCGCTGCTGGACAGCCCGGGGTCGCTGCACCACGGCGTCCCGTCTGCGCTACCCTC  
GGCGCCCGGCGGCGGCGGCACGGGCCCGGCGGGTGGAGGCGGCGGCGGCGGCGTACGGTGGTGCCT  
CACGACCCGTTTCGCGCGGCCGCTCGACGGCATCGCGCCGTGGAAC TTACGCTGCTGGCGGCGCTCAT  
GGGCACCATCACGGCGCTGTGCTCGGGCGAGAACTTCGCCGTATCCTGGTGACGGTGTGCTTCCGGC  
AGCTGAGGCAGCCGCTCAACTACGTGCTCGTCAACCTGGCGGCGGCGGACCTGCTCGTCTCGGCCGTC  
GGCGGCAGCGTGAGCTTCTTACCAACCTCAAGGGTTACTTCTTCTGGGAGTCCAGGCCTGCGTCTG  
GAAGGGTTCGCGGTCACCTACTTCGGCGTGGTGGCCCTGTGGTTCGCTGGCCTTGTGAGCGC  
TATTTCTGATCTGCCGGCCGCTCGGGAACTTCCGTCTGCAGGCGAAGCACGCGGGGCTCGGCCTGGC  
CGTGGTGTGGATCTTCTCGCTGGCCTGCACCCTGCCGCCCGTGTGGGCTGGAGCAGCTATCGCCCCAG  
CATGATCGGCACCACCTGCGAGCCGAATTGGTACTCGGGCGACATGCACGACCACACCTTCATCATGA  
TGTTCTTACACCACCTGCTTCATCTTCCCGCTCACTGTCATATTCGTCTCGTACGGGAAGCTCATAAAAA

ACTCAAAAAGGCGTCGGAGACGCAGCGCGGCCTGGAGTCGACGCGGGCGCGGGAGCAGCAGGTGACG  
CGAATGGTGGTGGTCATGATCCTGGCGTTCCTCTTCTGCTGGATGCCCTACGCCACCTTCTCGATCGTG  
GTCACGGCGTGCCCTTCCATCCACATCGACCCGCTGCTGGCCGCCGTGCCGGCCTTCTTCTCCAAGACG  
GCCACCGTCTACAACCCCGTCATCTACGTCTTCATGAACAAGCAGTTCCGCGACTGCTTCTCGAGGTG  
CTGCCGTGCCGAGGCCTCAAGAAGTCGTCCGTACGCAGACGGCGGGCGCGCGCAACACGGAGCACA  
CGGCCTCCGTCGACCGCCTCAGCCCCGGCGGGCGGCACCCGCATCTCGCTGGCCGCCGCCGCGGGCCGCG  
GGGGGGCCCAAGTTCACGAGCGCCGTGCGGCCGGGACCCGGCCACCCGCATCGTGGAGCCGACCCTCG  
CCGTGGCCGCCTCCGTGCAAAGCCTCGCGAGCAAAGTCGGCGGGTCCGTACCAACACCGACAACAGCAG  
CAGCCGGAAGGGGGGAGTATCAAGGGCCGTCAAACCCGGCCATCACGCACGTGCAGCCGCTGCTCA  
CCCGCGCCGAGTCCGTGAACAAAATTTACCCGGTGTAG

>KT749683\_VAL-Partial\_M.\_mordax\_32621-1-1

CCGCTCGCCGGCATCGCGCCGTGGAACCTTACCATGCTGGCGGCCCTCATGGGCATCATCACCACACT  
CTCGCTCGGGGAGAACTTCGCCGTATCCTGGTGACGGCGCGCTTCCGCCAGCTGCGCCAGCCTCTCA  
ACTACGTGCTCGTTAATCTGGCGGGCGGCGGATCTGCTCGTGTGCGCCATCGGGGGCAGCGTGAGCTTC  
TTCACCAACCTCAAGGGATACTTCTTCTGGGAGTCCACGCCTGCGTGCTGGAAGGTTTCGCGGTACC  
TACTTCGGCGTGGTGGCCCTCTGGTCTCTGGCCCTGCTGGCGTTCGAGCGCTATTTCTGTGATCTGCCGA  
CCGATGGGGAACCTTCCGCCTGCATGCGAAGCACGCGGGCGCTGGGTCTGGCCGTGGTGTGGCTCTTCTC  
GCTGGCGTGCACTCTGCCACCCGTGCTTGGATGGAGCAGCTATCGTCCGAGCATGATCGGCACCACCT  
GTGAGCCCAACTGGTACTCTGGCGAGCTGCATGATCACACGTTTCATCGTGATGTTCTTAACGACCTGCT  
TCATATTCCTCGTGGCTGTGATATTTGTCTCCTACGGGAAGCTGATACAAAACCTCAAGAAGGCGTCCG  
GAGATGCAACGTGGCCTCGAGTCGACTCGGGCGCGCCGAGCAGCAGGTGACGCGCATGGTGGTGGTGA  
TGATCCTGGCGTTCCTCATCTGCTGGACGCCCTACGCCACCTTCTCCATCGTGGTACCCGCGTGTCCCTC  
CATCCACATCGACCCGCTGCTGGCCGCCGTGCCGGCCTTCTTCTCAAAGACGGCCACCCGTCTACAACCC  
CGTCATCTATATCTTCATGAACAAGCAGTTCGCGACTGCTTCATGCAGGTGCTTCCGTGCGGGAGCTT  
CAAGAAGGTTGCCGTGATGCAGACGGCCGCCGCGCACAAACACAGCCTCCGCGAGACCCGCACAGCCCC  
ACGAACCGGCACAGCATCTCGCTGGCCGCGGGGAGGCCCAAGTTTACGGGGCGCCGTGCCCCGGGCC  
CACGACCGGCGTGGTGGAGCCGACGATGGCTGTTGCCGACGCTATGGATGGCCCCAAGAAGTGTCCG  
AAGCTCTGTACCAGCAGGAGGAAGGGCATCAGGAGCAAGAGCAGCAAGACGAGCTGTCAATCCCTCC  
GATCACCCACGTCCAGCCGCTACTCGACCACGTGAGTCCGCGAACAAAATCCATCCGGTTAG

>KT749684\_Parietopsin\_G.\_australis\_49194-1-1

ATGCAGGAGCAGAGCAGCAGCAGCACGGCGCTGGCGGTGTTTGGAGCGACGCCGCGGGCTCCACGC  
CACCGGGCCCGACCATCTTCCCCCGCCGGCTACACCGTCCCTGGCCACGTTAATGTTCTCAACGCCA  
GTTTCTCCATCGTCAACAACGCGCTGGTCATCGCGATCACCTGCCGCTACCCGTCGCTGCGGAACCCGC  
TCAACGCGCTGATCCTCAGCATGTCGGTGTGCGGACCTGCTCATGTCTCTGTTTCGGCACCACCGTCCGG  
CAGTCACCAACCTGCACGGCTCCCTGCGCCACATCGGCCACGCCGGCTGCGTCTTCCAGGGATTACG  
GTCAACTACTTCGGCTGCGTGTGCTGTGGTCTCTCACGCTGCTGGCCTACGAACGCCGCCTCGTGGTG  
ACTCACGGCTGCTCGCTGAGGGGCGGCTGGTCCCGGGCCCGCCGCGGCTGGCCTTCGTGTGGACCTT  
CTGCCTGGTGTGGGCCGTGGCGCCGTTGCTGGGCTGGAGCGCCTACGGGCCCAGGGCGTGCAGACGT  
CCTGCTCCCTGGCCTGGGAGCGGCGCTCCCTCAGCAACTACACATACTGGTTGGGTACTTCTGTGCTG  
GCTTCGCGGTGCCGGTCTCCATCATCATCTTCTCGTACGGAAACGTGCTCTGCTCCTTGCACACGTTGA  
ACAAGAAGATTGAGCGCGTGGGCGGGCACCGAGACCCGAGGGAGGAGGTGCGTGCCGCCGTGATGGT  
GCTCGCCATGGTCGGCGCGTTCATGGCGTGTGGCTGCCCTACACGCTGCTGGCGCTGTGCGTGGTGTG  
GGCGCCCGGCACGCACATCCCCCGTTAGTCGCCACGCTGCCCATGTACTTCGCCAAGACGAGCCCCA  
TCTACAACCCATCATCTACTTCTTCTCAACCGCCAGTTCCGCGTCTGCGCCGTGGAGTTCGTGACGT  
GCGGGCGCCGTGAGGCTCAACGAGCCGGACGGGGATGGCGGCAGCGTGTCCCTCGCCCCGACACCCGCC  
GCCCGGCGCCACCGAGCTGCCGGCTCCACCGCCGCCACCGCCCCACGGCGCAACCAGGTGAGCCCCG  
CCTGA

>KT749685\_OPN3\_G.\_australis\_57727-1-4

ATGCCGTCCGCGGTGGCGCTGAGAGGAGAGCTGGTGAACGTGACGGCCCCCGTGCTGCTCCGTGTCCC  
GTCCGAGGGTCCC GCCGACAGGACGGGCCCTTACGCCGGGGACCTACACCGCCCTCGCCCTCCTCG  
TGGGCACCATCGCGGTGCTGGGAGTGTGTTGCAACGCGCTCCTGTTGGCACTCTTCGTCAAGTTAAGA  
GGCTGCAAACGCCAGCAACCTCCTGGTGGCCAACATGAGCCTCAGCGACCTCCTGGGTTTCGCTGTCC  
GGCAGCGGCCTCACGCTGGGCGCCTGTATGGGGCACGGGTGGCACTGGGGCCCCTCGCCTGCATGTG  
GGACGGCTTCGCCAACACCCTGTTCCGGGCTGGTGTCCATCGGCTCGCTGAGCGTGTGGCTTGGGAGC

GCTGCGCCCGCGTGCTCGCAACCTCGGACTCCAGGCCCTGCGACCTGGCCTGGAGCCTGCGGGCCCGCC  
CTGGCCACCTGGATGTACGCTCTCGCCTGGGCCTCCCCGCCCGTCTGGGCTGGAACCACTACTACTG  
GAGGCCACGGGCTGGGCTGCTCGGTGGACTGGCGCTCCCGGGCCCGCGTGGACTGCATCTACACGGG  
GTTCTGTTCCTCTTCTGCTGACCGGGCCCGTTCATGCTCATGACCTACTGCTACGGCAGCATCCTGCT  
GGCCGTGCACAGGTTCCGCAAGCTGGAGGCGCTGCAGGCTCCCCAGGTGGTGAAGGCGCGGCGCTTCG  
AGCTGCAGCTGTCGGCGGTCTGCCTGCTCATGATGCTGCTCTTCTGCTGTGCTGGGCCCCCTACGCGG  
TCGCGTCCCTGCTCGTGGCGAGCGGCCTCGAGAACGTGCTCTCCCTCCCGTGTCCGTCGTGCCGGCAC  
TCCTCGCCAAGTCCAACGCCGTCTGCAACCCGCTGCTCTTCTGCTCATGAGCGGCAATTTCTGCCGCT  
GTCTGCGCACCCTGTTCTTACGCTGCGCTGGAGGGCGCATGAGGGCCCGTGGGCATCATGTGTCC  
CCAGGCGCGGCGCAGCAGCACCTCGACCCCGTGCGGCCCAAGAAGAAGGTCACCTTCAGCAGCAACT  
CCATCGTGTTCATCATCGCGTCCAGCGACGACGGCGACCACGACCTGGACCTCCCCGCGCTCGGCGAG  
GAGGAGGAGGAGGTTGAAGAGGAGGTTGAAGAGGAGGATAACGTGGAGGGGGAGGCGGAGGAGGG  
GGTGGTGAAGGAGGTCACAGACTCGTGCGTGCTCCAAGTGGAGCCAGATTGA

>KT749686\_GNAT1\_E.\_cirrhatus\_138744-1-2

ATGATGGGCAGTGGAGCCAGCGCAGAAGATAAGGACCAAGCCAGGCACTCCAAGGAAGCTTGAGAAGA  
AGCTCCAGGAAGATGGGGAGAAGGATGCACGCACTGTGAAGCTTCTACTGTTAGGGGCTGGCGAGTCT  
GGAAAGAGCACCATTGTGAAACAGATGAAGATTATCCACAAAGAAGGCTACTCTAAAGAAGAATGTT  
TGGAGTTTATCACCATCATTACAGCAACACGCTCCAAAGTATATTGGCCATCGTTAAGGCGATGTCAA  
CGCTGAACATCGACTACGGAGATACATCGTGCCAGGATGATTCCAGGCAACTGTACAACCTGGCAGAC  
TCCATTGAGGAGGGCGCCATGCCCAAGAGCTGTATCTCATCATCAAACGCCCTGTGGTTGGATGCGGG  
GATCCAGGCGTGCTTTGAGAGAGCATCCGAGTACCATCTCAACGACTCAGCACACTATTACTTGAGTG  
ATTTGGACCGACTGGTGGAGCCAGGCTACATTCCCACCGAACAAGATGTCCTCCGCTCCCGGGTCAAG  
ACCACCGGCATCATTGAAACGCAGTTCGGATTAAGACCTTAACTTCAGGATGTTTGATGTTGGTGG  
GCAACGGTCTGAGCGGAAGAAATGGATCCATTGCTTTGAGGGTGTAACTGTATTATATTCTGTGCCG  
CACTCAGTGCTTACGACATGGTTCTCATCGAAGATGATGAAGTGAATCGCATGCATGAAAGCCTCCAC  
CTCTTCAATAGCATCTGCAACCATCGCTACTTCATCACCACCTCCATTGTGCTCTTTTTGAACAAGAAA  
GACCTTTTTGAAGATAAGGTCAAAAAAGCACATCTGAGCATTGTTTTCCAGAATATGATGGCTCCAA  
CACTTACGAAGATGCAGGGAATTACATCAAGCTACAGTTCCTGGACCTGAACTTGCGCAAAGACATAA  
AGGAGATCTACTCTCACATGACCTGCGCCACGGACACGAAGAACGTGAAGTTTGTGTTTCGACGCCGTG  
ACCGATATCATAATCAAGGAAAATCTCAAAGATTGCGGCCTCTTTTAA

>KT749687\_GNAT1\_G.\_australis\_56192-4-1

ATGGGCAGCGGCGCTAGCGCAGAGGACAAGGACCAGGCCAAGCACTCCAAGGAGCTGGAGAAGAAG  
CTGGCGGAGGATGCGGAGAAGGACGCCCGGACCGTCAAACCTCCTGCTGCTAGGGGCTGGAGAGTCTG  
GAAAGAGCACCATCGTTAAACAGATGAAAATTATCCATCAAGACGGTTACTCCGTTGAAGAGTGCATG  
GAGTTCATAGCCATCATCTACAGCAACACTTTGCACTCCATCCTGGCTATAGTGCGAGCGATGGGAAC  
CCTGAGCATAGACTTCGGGGACTCGGCACGGATGGACGACTCGAGGCAGCTGCACAACCTGGCCGACT  
CAATCGACGAGGGAACCATGCCAACGAGCTCTATCTCATCATCAAGCGCCTGTGGACCGACTCGGGC  
ATCCAGGTGTGCTTCGACCGGGCCTCCGAGTACCAGCTCAACGACTCGGCATCATACTACCTGAACGA  
CATCGACCGCCTGGTGCAGCCCGGATACCTCCCCACCGAGCAGGACGTCTGCGGTCCCGAGTCAAAA  
CCACCGGCATCATCGAGACGCAGTTCAGCTTCAAGGACCTGCACTTCAGGATGTTTCGACGTTGGAGGG  
CAGCGCTCGGAGCGAAAGAAGTGGATCCACTGCTTCGAGGGCGTCACTGCATCATCTTCTGCGCCGC  
CCTAAGCGCCTATGACATGGTGTGTTGGAGGACGATGAAGTGAACCGCATGCACGAGAGCCTGCAC  
CTGTTCAACAGCATCTGCAACACCGCTACTTCAACGCCACCTCCATCGTGCTCTTCTCAACAAGAAG  
GATCTGTTTGAAGAGAAGGTGAAGAAGGCCATCTGAGCATCTGCTTCCCCGAATACGACGGGTCCAA  
CACGTACGACGATGCGGGCAATTACATCAAGCTGCAGTTCCTCGACCTGAACATGCGCAAGGAATCAA  
AGGAGATCTACTCGCACATGACGTGCGCCACCGACACCAAGAACGTCAAGTTCGTGTTTCGACGCCGTG  
ACCGACATCATCAAGGAAAACCTCAAGGACTGCGGTCTCTTCTGA

>KT749688\_GNAT1\_Reef\_shark\_36724-1-1

ATGGGAGCAGGAGCCAGTGCAGAAGAGAAACATTTCGAGGGACTTGGAGAAGAACTGAAGGAAGAT  
GCGGAGAAAGATGCAAGAACAGTCAAGCTTACTGCTGGGTGCTGGGGAATCTGGCAAGAGCACGA  
TTGTCAAGCAGATGAAAATTATTCACCAAGATGGCTACTCCCGCGAGGAATGTCTTGAGTTCATCAGC  
ATCATCTACAGTAACACCTTGCAGTCTATGATGGCTATTGTCAAGGCAATGACCACACTCAACATCGG  
ATACGGAGACAGTGCCAGACAGGATGACTCCCGCAAACCTGATGCATCTAGCTGATACGATCGATGAG  
GGGACCATGCCAAATGAGCTGTACGAAATTATCAGCCGTCTCTGGAAGGACAGCGGCATCCAGGCCTG

CTTCGAACGAGCCTCGGAGTACCAACTGAACGATTCTGCCGGCTACTATCTCAATGACCTGGATCGAA  
TTGTACAGCCAGGGTATCTCCCCACTGAGCAAGATGTACTGCGTTCAAGAGTCAAACCACCGGAATT  
ATCGAGACCCAATTTGGATTTAAAGATCTCAACTTCAGAATGTTTGACGTGGGTGGTCAGCGCTCTGA  
ACGCAAGAAATGGATCCACTGCTTTGAAGGCGTCACCTGCATTATCTTCATCGCGGCGCTCAGCGCTTA  
CGATATGGTGTCTGGTGGAAGATGACGAGGTGAACCGTATGCACGAGAGTCTGCATCTCTTCAACAGTA  
TTTGTAACCATCGTTACTTCATCGCAACCTCCATTGTCCTCTTCTCAACAAGAAGGATGTGTTCCAGG  
AGAAGATCAAGAAGACTCACTTGAGTATTTGCTTCCAGATTACGACGGAAACAACCTCAATGGAGGAT  
GCCGGAGCATAATTAAGGCCCAATTCCTAGAATTGAACATGAGACGAGACGTGAAGGAGATTTACTC  
GCACATGACCTGTGCTACAGACACAGAGAACGTCAAGTTTGTGTTTCGACGCAGTGACAGACATCATCA  
TCAAAGAGAACTTGAAAGACTGCGGTCTGTTCTAA

>KT749689\_GNAT1\_Bluespot\_ray\_34616-1-1

ATGGGAGCAGGAGCTAGCGCAGAGGAGAAACACTCCAGGGAGCTGGAAAAGAAGCTGAAGGAAGAT  
GCCGAGAAAGATGCAAGAACAGTGAAACTCCTACTGCTGGGGGCTGGCGAATCTGGCAAGAGCACCA  
TTGTCAAGCAGATGAAAATTATTCACCAGGATGGCTACTCCCGGGAGGAGTGTCTGGAGTTCATTGCC  
ATCATTTACAGCAACACCCTGCAGTCTATGATGGCCATAGTGAAGGCAATGAACACACTGAACATCGG  
CTACGGAGACAGTGGCAGGCAGGACGACTCGCGCAAGCTGATTCACCTGGCCGACACGATCGAGGAG  
GGGACTATGCCAAAGGAGCTGTATGAGATCATCAGCCGCTCTGGAAGGACTCTGGAATCCAGGCCTG  
CTTTGAACGAGCCTCAGAATACCAGCTTAATGACTCGGCCGGCTATTATCTCAATGACTTGGATCGAAT  
CGTACAGCCGGGCTATCTCCCCACTGAGCAGGACGTGCTGCGCTCCCGAGTGAAAACCACCGGCATTA  
TTGAGACCCAGTTCGGATTCAAGGACCTCAACTTCAGGATGTTTGACGTGGGGGGCCAACGCTCTGAG  
CGCAAGAAATGGATCCACTGCTTTGAAGGGGTCACGTGCATCATCTTCATTGCCGCCCTCAGCGCCTAT  
GACATGGTCTTGGTCGAGGACGATGAAGTGAACCGTATGCACGAGAGTCTGCATCTCTTCAACAGCAT  
CTGCAATCATCGCTACTTCATCGCCACCTCCATTGTCCTCTTCTCAACAAGAAGGACGTGTTTCAGGA  
AAAGATCAAGAAGACCCACCTGAGTATCTGCTTCCCGGACTATGACGGCAACAACCTCAATGGAAGATG  
CTGGAAACTACATTAAGCCAGTTCCCTGGAATTAACATGAGGAGGGATGTGAAGGAGATCTACTCC  
CATATGACCTGTGCCACAGACACAGAGAACGTCAAGTTTGTGTTTGATGCAGTGACAGACATCATCAT  
CAAGGAGAATTTGAAAGATTGTGGTCTGTTCTAA

>KT749690\_GNAT1\_Florida\_gar\_23900-1-1

ATGGGAGCAGGTGCCAGCGCTGAGGAGAAACACTCCAGAGAGCTGGAGAAGAAGCTCAAGGAAGAT  
GCGGACAAGGATGCCAGGACTGTCAAACCTGCTGCTGCTGGGTGCTGGTGAGTCTGGGAAGAGCACCAT  
TGTC AAGCAGATGAAAATTATCCACAAAGATGGTTACTCGCTTGAAGAATGCTTGGAGTTCATTGTTAT  
TATCTACAGCAATACTTTGCAGTCAATCATGGCCATTGTGAAAGCAATGAATACCCTCAATATAAGCT  
ACGGGGACTCAGGTAGACAGGATGATGCCCCTAAGCTGATGCATCTGGCCGACACCATCGAGGAGGG  
CACTATGCCAAAGGAAATGTCCGATATCATCCAGCGCCTCTGGAAAGACTCAGGGATCCAGGCATGCT  
TTGATCGGGCTTCTGAATACCAGCTCAATGACTCTGCTGGATATTACCTGAATGACCTGGAGAGGCTG  
GTCACACCTGGCTACGTCCCCACTGAGCAAGATGTGCTGCGGTCAAGAGTAAAGACCACTGGTATCAT  
TGAGACCCAGTTCTCCTTCAAGGACCTGAACCTCAGGATGTTTCGATGTGGGCGGTGACGCTCTGAGA  
GGAAGAAGTGGATCCACTGCTTTGAGGGGGTACCTGTATTATCTTCATCGCAGCTCTGAGCGCTTACG  
ACATGGTGTCTCGTAGAAGATGATGAAGTGAACCGAATGCACGAGAGCCTCCATCTGTTCAACAGTATC  
TGCAACCATCGTTACTTTGCCACCACCTCCATCGTACTCTTCTCAACAAGAAGACGTCTTCATTGAA  
AAGATCAAGAAGGCTCACCTCAGCATGTGCTTCCCTGATTACGATGGCCCAATACCTATGAAGATGC  
TGGTAATTACATTAAGTTGCAATTCTTGGAGCTGAACATGAGAAGAGATATCAAGGAAATCTATTCCC  
ACATGACCTGCGCCACAGACACAGAAAACGTTAAGTTTGTGTTTGACGCTGTCACAGACATCATCATC  
AAGGAAAACCTGAAGGACTGTGGTCTCTTCTAA

>KT749691\_GNAT1\_Bowfin\_36439-1-1

ATGGGAGCAGGTGCCAGCGCTGAGGAGAAACACTCCAGAGAGCTGGAGAAGAAGCTCAAGGAGGAT  
GCCGACAAAGATGCCAGGACCGTCAAGCTGCTATTGCTGGGTGCTGGTGAATCTGGGAAAAGCACAAT  
TGTC AAGCAGATGAAAATTATCCACAAAGATGGTTACTCGCTTGAAGAATGCATGGAGTTTGTGTTGA  
TTATCTACAGTAACACCCTCCAGTCAATTATGGCCATCGTTAAAGCGATGACAACCCTCAACATTGGCT  
ATGGAGACACAGCCAGACAGGATGATGCCCCTAAACTGATGCACCTAGCTGACACCATCGAGGAAGG  
CTCCATGCCAAAGGAGATGTCCGAGATAATCATAACGCTATGGAAAGACTCTGGGATCCAGGCCTGCT  
TTGACAGGGCTTCTGAGTACCAGCTCAATGACTCTGCTGGATATTATCTGAACGACCTGGAGAGACTG  
ATCCAGCCCGGCTATATACCCACTGAGCAAGATGTACTGCGATCAAGAGTGAAGACCACTGGTATCAT  
TGAGACCCAGTTCTCTTTCAAGGATCTGCACTTCAGGATGTTTGATGTGGGTGGTCAGCGCTCCGAGAG

GAAGAAGTGGATCCACTGCTTTGAAGGAGTCACCTGTATCATCTTCATCGCGGCTCTGAGCGCTTATGA  
CATGGTGGCTGGTGGAGGATGATGAAGTGAACCGAATGCACGAGAGTCTCCATCTGTTCAACAGTATCT  
GCAACCATCGCTACTTTGCCACCACCTCCATTGTGCTCTTCCTCAACAAGAAGGACGTCTTCATCGAGA  
AGATCAAGAAGGCTCACCTCAGCATGTGCTTCCCCGATTATGATGGCCCCAACACCTATGAAGATGCC  
GGCAACTACATCAAACCTGCAATTCCTCGATCTCAACCTTCGGCGAGACATCAAGGAAATCTACTCCCA  
CATGACCTGCGCCACAGACACAGAAAATGTCAAGTTTGTGTTTCGACGCCGTCACCGACATTATCATCA  
AAGAAAATCTGAAGGATTGCGGTCTCTTCTAA

>KT749692\_GNAT2\_Reef\_shark\_47854-2-1

ATGGGGAGCGGAGCGAGTACGGAGGACAAGGAATTAGCCAAGAGGTCAAAAGAAGTCTGAGAAAAAAA  
CTGCAGGAAGATGCAGAGAAGGAAGCCAGAAGTGTGAAGCTTTTGCTCCTTGGTGGTGGTGGTGGTGG  
AAAAGCACGATCGTAAAACAGATGAAAATCATTATCAAGATGGTTACACAAAAGAAGAGTGTGGTGG  
GCCTTTATATCCGTCATCAATGGCAACATTCTCCAATCTATCCTGGCTATTATTTCGAGCCATGTCCACTA  
TTGGAATTGATTATGGAGATGCAGCAAATGCGGAGGCTGGGAGACAGCTGTTCAATCTTGGCGGATTCC  
ATTGAAGAGGGGACCATGCCCAAGGAGCTGGTGGATGTGGTGAAGAACTGTGGACTGATTCAGGAG  
TTCAGGCTTGCTTTGAAAGGGCAGCAGAGTATCAGCTCAATGACTCGGCCTCCTACTATTTAGACAACC  
TAGACAGAATCACAGCTCCTGACTATATTCCAATGAGCAAGACGCTTAAAGGTTCGAGAGTGAAGACC  
ACAGGTATCATTGAAGAACAATTCTCTTGCCAGGATCTGCACTTCAGAATGTTTGATGTTGGTGGCCAG  
AGGTCTGAACGGAAGAAGTGGATCCATTGTTTTGAAGGAGTTACCTGCATTATTTTCTGCGGTGCTCTC  
AGTGCATGATGACATGGTGGTGGGAGGATGATGAAGTGAACCGAATGCACGAGAGCCTCCATCTCTT  
CAACAGTATTTGCAACCACAGGTAATTTGCCGCCACCTCCATTGTGCTTTTTTTGAATAAGAAGGATCT  
TTCCAGGAAAAAATCCAAAAAGTTCATCTAAGCATCTGCTTCCCGGATTATGACGGCTCCAACACAT  
ATGATGATGCTAGTAATTACATCAAGAACCAATTCTGGACCTCAACATGCGAAAAGATGTTAAAGAA  
ATCTATTCACACATGACATGTGCCACTGACACACAAAATGTCAAGTTTGTGTTTGGTGGTGGTGGTGG  
ATCATCATCAAAGAAAATCTTAAAGATTGTGGCCTTTTTCTGA

>KT749693\_GNAT2\_Bluespot\_ray\_36933-1-1

ATGGGGAGTGGAGCGAGTGCAGAGGACAAGGAGCTAGCCAAGAGGTCAAAAGAAGTGGAAAAGAAA  
CTGCAGGAAGATGCAGAGAAGGAAGCCAGGACAGTGAATTGCTGCTTCTAGGAGCTGGTGAATCAG  
GAAAAGCACCATTTGTCAAACAGATGAAAATCATCCACCAAGATGGTTATACAAAGGAAGAATGTTT  
AGCCTTCATATCCATCATCAACGGCAATATCCTTCAGTCTATCCTGGCCATCGTTCGAGCCATGTCCAC  
CCTTGGGATTGACTATGGAAATACAGCAAATGCGGATGCTGGAAGACAGCTGTTTAATCTTGCAGATT  
CCATTGAGGAGGGAACCATGCCGAAGGAGCTGGTGGACGTCATAAAGAAGCTGTGGGACGACGCTGG  
GATTCAGGCTTGCTTCGAGAGAGCGGCAGAGTATCAACTCAATGATTCGGCTTCCACTACTTGAACA  
ACTTGGATAGAATCACTGCACCTGGCTTCATTCCAACGAACAAGATGTCTTGGCGTCTAGAGTTAAG  
ACCACGGGTATTATTGAAGAACAGTTCTCTTGCCAGGATCTGAATTTAGAAATGTTTGACGTTGGTGGG  
CAGAGGTCGGAACGGAAGAAATGGATCCACTGTTTCGAGGGAGTTACCTGTATTATCTTCTGTGGTGC  
CCTCAGTGCTTATGACATGGTGTGGTGGAAAGATGATGAAGTGAACCGAATGCACGAGAGTCTCCATC  
TCTTCAACAGTATTTGCAACCACAGGTAATTTGCAGCCACCTCCATTGTACTCTTCTTGAACAAGAAGG  
ATCTATTCGAGGAAAAAATCAAAAAAGTTCAATTTGAGCATCTGCTTTCAGACTACGATGGTCCCAAT  
ACGTACGAAGATGCCGGCAATTACATCAAGGTCCAATTCTGGACCTCAACATGCGAAAAGATGTGAA  
AGAAATCTATGCACACATGACGTGTGCCACTGACTCAAAAATGTCAAGTTTGTGTTTTCGATGCTGTGAA  
AGACATCATCATTAAAGAAAATCTTAAAGATTGTGGGCTTTTTCTAA

>KT749694\_GNAT2\_Florida\_gar\_20924-1-1

ATGGGGAGTGGAGCAAGCGCAGAGGACAAGGAGCTGGCCAAGAGGTCCAAGGAGCTGGAGAAGAAG  
CTGCAGGAGGACGCGGACAAGGAGTCCAAGACCGTGAAGCTGCTGCTGCTGGGGGAGGAGAGTCCG  
GGAAGAGCACGATCGTCAAGCAGATGAAGATTATCCATCAAGATGGCTACTCAGAACAGGAGTGTCT  
GGAATTCAGAGCCATCATCTACGGCAATATCCTGCAGTCCATTGTGGCCATCATCAGGGCCATGAGCA  
CCCTGGGGATTGACTATGGCGAGCCCAGCAAAGCGGAAGACGGGCAGAAGCTTTTCAACCTGGCAGA  
CTCCATCGAGGAAGGCACCATGCCAGCAGAGCTGGTGGACCGTCATCAAGAAGCTATGGAAAGATTCA  
GGGGTGCAGGCCTGCTTCGAGAGGGCAGCCGAATACCAGCTCAACGACTCTGCTGCCTACTACCTCAA  
CGAGCTTGACAGAATCACGGCCCCCACTACCTGCCAATGAGCAGGATGTGCTGCGGTTCGCGAGTCA  
AGACCACGGGCATCATCGAGGAGCAGTTCTCCTTCAAGGACGTGCACTTCAGAATGTTTGACGTGGGG  
GGTCAAAGGTGAGAACGCAAGAAATGGATCCATTGCTTTCGAAGGCGTGACCTGCATCATCTTCTGCGG  
GGCCTCAGTGCGTATGACATGGTCTGGTGGAAAGACGATGAAGTGAACCGGATGCATGAGAGCCTCC  
ACCTCTTCAACAGCATCTGCAACCACAAGTTCTTTCGCTGCCACCTCCATCGTGTCTTCTCCTCAACAAGA



AAGACCTCTTCCTGGAGAAAGTCAAGAAGGTGCACCTGAGCATCTGCTTCCCGGATTACGATGGGCCC  
AACACATTCGAGGATGCTGGCAATTACATCAAGAACCAGTTCCTGGATCTGAACATGAGAAAAGATGT  
CAAAGAAATCTACTCACACATGACGTGCGCCACGGACACGCAGAACGTCAAATTTGTGTTTCGACGCTG  
TCACAGACATCATCATC

>KT749695\_GNATX\_G.\_australis\_56192-3-1

ATGGGGAGCGGCGGAGCGCAGAGGACAAGGAGTCCGCAAAGCGCTCCAAGGAGTTGGAGAAGAAG  
CTCGCCGAAGATGCCGAAATGGAAGCGAGGACGGTGAAGCTCCTGCTGCTAGGTGCTGGAGAATCTG  
GAAAAAGTACCATCGTAAAGCAAATGAAGATCATCCACAAGGACGGCTACTCAGAAGCGGAGTGCCT  
CGAGTTCCGGGCCATCATCTACAGCAACACGCTGCAGTCCATCCTCGCCATCGTGCAGCCATGGAGA  
CCTTCAGCATCGACTACGGGGACAGCGCCAGAGCAGCCGACGGGAGGCAGCTCATCAACCTGGCCGA  
CTCGCTGGAGGAGGGATCCATGCCCAAGGAGCTCGCCGACATCATCCTGCGCCTGTGGAAGGACAGCG  
GGGTGCAGGCGAGCTTCGACCGCGCGTCCGAATACCAGCTTAACGACTCGGCCGCCTACTACCTCAAT  
GACCTGGATCGTCTGATGATGCCCAACTATCTGCCCAACGAGCAAGACGTCTGCGCTCGCGTGTCAA  
AACCACCGGCATTATCGAGGACTCCTTCTGCTTCAAAGACCTACAGTTCAGGATGTTTCGACGTGCGAG  
GCCAGCGCTCCGAGCGGAAGAAGTGGATCCACTGCTTCGAAGGCGTCACGTGCATCATCTTCTGCGGC  
GCGCTGAGCGCCTACGACATGGTGTGCTGTCGAGGACGACGAAGTGAACCGCATGCACGAGAGCCTGC  
ACCTGTTCAACAGCATCTGCAACCACCGCTACTTCATCGCCACCTCCATCGTGCTGTTTCTCAACAAGA  
AGGACCTCTTTTCGGAGAAAGTCAAGAAAGTCCACCTCAGCATTTGTTTTCCGGACTATGACGGTCCG  
AACACCTTCGAGGACGCGGGGAACACTACATCAAGAACCAGTTCCTGGACCTGAACCTGCGCAAGGAGT  
CGAAGGAGATCTACTCGCACTTGACGTGCGCCACCGACACCCAGAACGTCAAGTTCGTGTTTCGACGCC  
GTCACGGACATCATCATCAAGGAAAATCTGAAAGACTGCGGCCTATTCTAA

>KT749696\_GNATX\_M.\_mordax\_40420-1-2

ATGGGGAGCGGCGGAGCGCAGAGGACAAGGAGTCCGCCAAACGCTCCAAGGAGTTAGAGAAGAAA  
ATCGCTGAAGATGCCGAGATCGAGGCGAGGACGGTGAAGCTCCTGCTACTGGGTGCTGGAGAATCTG  
GGAAAAGTACAATCGTAAAGCAAATGAAGATCATCCACAAGGACGGCTACTCAGAAGCGGAGTGCCT  
CGAGTTCAGGTCCATCATCTACGGCAACACGCTGCAATCCATCCTCGCCATCGTGCAGCCATGGACA  
CTCTCGTCATCGACTACGGGGAGCCACCAGAGCAGCTGACGGGAGGCAGCTCTTCAACCTGGCAGAC  
TCACTGGAGGAGGGCACCATGCCCAAGGAGCTGTCTGATATCATCGTGCGCCTGTGGGGCGGACAGCGG  
CATAACAGCGTGCCTCGAGCGCGCTGCCGAATACCAGCTCAACGACTCCGCCGCCTACTACCTCAACT  
CCCTGGATCGCCTGATCCAGCCCAACTACCTTCCCACCGAGCAAGACGTGCTGCGCTCCCAGCGTCAA  
ACCACCGGCATCATCGAGGACGCCTTCTCCTTCAAGGACCTGCAGTTCAGGATGTTTCGACGTGGGAGG  
CCAGCGATCCGAGCGTAAGAAGTGGATCCACTGCTTCGAAGGCGTCACCTGCATCATCTTCTGCGGGC  
CGCTGAGCGCCTACGACATGGTGTGCTCGTGGAGGACGACGAAGTGAACCGCATGCACGAGAGCCTCCA  
CCTCTTCAACAGCATCTGCAACCACCGCTATTTTCATCGTCACCTCCATCGTGCTGTTTCTCAACAAGAA  
AGATCTCTTTGAAGACAAGGTGAAGAAAGTCCATCTCAGCATTTGTTTTCCGGACTACGACGGTCCGA  
ACACCTATGAGGACGCCGGGAACACTACATCAAGAGCCAGTTCCTGGACCTGAACCTGCGCAAGGAATC  
AAAGGAAATCTACTCGCATCTGACGTGCGCCACCGACACCCAGAACGTCAAGTTCGTGTTTCGACGCCG  
TCACCGACATCATCATCAAGGAAAATCTCAAAGACTGCGGCCTCTTCTAA

>KT749697\_PDE6A\_Bamboo\_shark\_44500-12-1

ATGAGTGCGACGAAAGAAGAAGTGGAGAAATTTTTGGACAGCAATCCTAACTTTGCCAAGGAATACT  
ATGACACAAGACTACGAGCGATACATATTGCTAACATGCTGGGATCTCAAGAACCAAACAGGGACTA  
CAGTACTTTCCGGGAGGTAAACACTGTTGAGGAAAGTGAATTAATTTTTGAGCTGATTCGAGACATGC  
AGGATATTAATATGGAAAAGACAGTGTTTAATACTCAGAAGAATTACATTTCTCATTCAAGCAGAT  
TGTATGAGTTTGTTCATGTACAGATCTAGGAATGGAACCTCTGAACTTGCCACTAGGCTATTTAATGTT  
CAAAAGGATTCTGTTTTTCGAAGATTGTTTTGTTACACCAGATTGTGAAATAGTTTTTCTCTTGACACTG  
GGATCATTGGATATGTGGCTCACACTAAGAAAACAGTAAATATCAAGGATAAAGACAAGGATGAACA  
TTTCTGCGATTTTGTGGACACCCTGACAGAGTATAAAACAAATAGTGTTCTGGCAACTCCAATAATGA  
ATGGAAAAGATGTAGTTGCTGTTGTGATGGCTGTAACAAAATAACAGGATCACATTTACCACCAA  
GATGAAGAGATTTTATTGAAGTATCTCAATTTTCTCAACCTAACACTCAAGATCTATCATCTGAATTAC  
CTCCATGGGTGTGAAACCAGGAAAGGGCAGGTTCTTATGGTCTGCAAGCAAAGTATTTGAAGAACT  
TACTGATATTGAGCGTCAATTTCAAAAGCCCTTTACACTGTGCGAGCCTTTCTGAACTGTGACAGATA  
TTCGGTTGCGCTCCTGGACATGACAAAGGAAAAGGAATTTTTTGTATCTTTGGCCAGTACAAATGGGTG  
AGGTACCACCATAACGATGGTCCAAGAACTCCAGATGGAAGGGAAATAAACTTCTACAAAATAATTGAT  
TACATCCTTCATGGAAAAGAGGAAATTAAGTTCATCCCGAACCTCCTCCAGACCATTGGGGCCCTAGT

TAGTGGGTTACCGTCGTATGTTGCAGAAACCAGCCTTATATGCAACATTATGAATGCAGCTGCAGATG  
AATTCTTTGAATTTTCAGAAAGAGCCACTTGATAGTTTGGGATGGACAATTAATAATGTGCTATCGATG  
CCAATAGTAAACAAGAAAGAGGAGATTGTTGGAGTTGCCACCTTTTATAATAGAAAGGATGGAAAAC  
CATTTGATGAAATGGATGAAACTTTGATGGAAGCCTTGACACAATTCCTTGGGTGGTCTGTTTTGAACA  
CGGATACATATGACAAAATGAACAAATTAGAAAATAGGAAAGATATTGCACAAGATATGGTGAAC  
TCATGTTAAATGCTCTAAAGATGAAATACAAGATATCCTGAAAACCTAGAGAATGCTTTGATAGAGAAC  
CCGATGAGTGTGAGGAAGAAGATCTTCAGGAAATCTTGGCTGAAGAACTTCCAGATGCTGAGGAAGC  
AGAACTCTATGAGTTCCACTTTTGTGATTTTGAATGGTCTCCATTGGACCTTGTGAAATGTGGAATACA  
GATGTATTATGAACTTGGTGTGGTTGATAAGTTCCACATAACCACAGGCGGTATTGGTCCGTTTCATTTA  
TTCTCTAAGTAAAGGATACAGAAAAATCACCTATCACAACTGGCGGCATGGGTTCAATGTTGGGCACA  
CCATGTTTGCCCTTCTCATGACTGGAAACCTAAAGCGCTACTACACAGATCTAGAAGCTTTAGCTATGG  
TGACAGCAGCATTTTGCCATGACATTGATCACAGAGGAACAAACAACCTCTATCAAATGAAATCACAG  
GATCCATTGGCAAACCTTCATGGCTCATCCATTATGGAACGCCATCACTTGGAAATTTAGCAAAAACCTG  
CTTCAAGATGAGGATTTAAATATCTTCCAAAATCTTAACAGAAGACAGTATGAACATGTCCTCCATCTG  
ATGGACATTGCCATCATTGCTACAGATTTGGCACTTTATTTCAAAAAAAGAACAATGTTTCAAAAAGAT  
AGTAGACCTGTCAGAAACATATGAAGATGATGAAGAATGGGTGCAATTTATGATACTGGAAACAACG  
AGGAAAGAAATAATCATGGCCATGATGATGACAGCATGTGATTTGTCTGCAATCACAAAACCTTGGGA  
AGTGCAAAGCAAGGTTGCTCTCTTAGTGGCAGCCGAATTCTGGGAACAGGGTGACTTGGAACGAACTG  
TATTGGAACAGCAACCTATTCCCATGATGGACAGAAACAAGCTGATGAACTTCCAAAACCTTCAAGTT  
GGTTTCATTGACTTTGTGTGCACTTTTGTATACAAGGAATTCACCAGATTTTATTCTGAAATTCAGCCTA  
TGCTCAGTGGCATCCTCAATAACAGAAAGGAATGGAAAGCACTGGCTGATGAGCATGAAGCGAAAGT  
TAAAGCCATTGAGGAAGAGAAACAACGGAAGGAAGAAGAACGTGCAGCAAAAACAAGCTAATGATGT  
ATCACAAAAGGCACAAGGTTCTCAGTCTAAGACATGCAATCTCTTGTA

>KT749698\_PDE6A\_Bluespot\_ray\_36960-2-1

ATGAGTATGTCTAAGGAAGATGTGGAAAAGTTCCCTGGATAACAATCCAACCTTTTGCTAAGGAATATTA  
TACTTGAAACTACGTCCTTTACATATTGCTAACTTGCTGGGAACTCAAGAAACAACCTATTGACTGTAG  
CACCTTCCGAGAGTTAAACAACGTGGAGGAAAGTGAACCTATTTTGAACCTATCCGAGATATGCAGG  
ATATTAATATGGAGAAGGTAGTGTTTAATACACTCAGGAGGATTGCCTTTCTCATTCAAGCAGATCGAT  
TGAGTTTGTTCATGTACAGATCCAGGAATGGTACTCCTGAACTTGCCACAAGGCTGTTCAATGTTTCA  
AAGATTCTGTTTTTGAAGACTGTTTCGTCCCACCAGAATGTGAAATAGTTTTCTCTTGACACTGGGA  
TCATTGGTTATGTAGCTCAAACAAGAAAACAGTCAACATCCATGATAAATCTCAGGATAGCCACTTC  
AGTGATTTTGTGGATGCTCTTACAGAGTATGAAACCAAGAACGTTCTGGCAACTCCAATAATGAACGG  
AAAAGATGTTGTCGCTGTTGTAATGGCTATAAACAAAGTAGATAGCCCATATTTACCACAAAAGATG  
AAGAAATTTTGTACGGTACCTCAATTTTCTCAATTTAACACTCAAGATTTATCACCTGAATTATCTTCA  
TAATTGTGAAACCAGGAAAGGGCAGGTACTTCTATGGTCTGCGAGCAAAGTATTTGAAGAACTAACTG  
ATATTGAACGACAGTTTCACAAAGCCCTTTACTGTGCGTGGCTTTCTGAACTGCGACAGATACTCTG  
TTGCACTGCTGGACATGACGAAAGAAAAGGAGTTTTTTGATCTCTGGCCAGTACAAATGGGTGAAGTA  
CCAGAGTATGATGGTCCAAGAACTCCCGATGGAAGGGAAATAAACTTCTACAAAATAATAGATTACAT  
CCTTCATGGAAAAGAAGAAATTAAGTTCATCCCGAACCTCCTGCAGATCATTGGGCCCTGGTTAGCG  
GATTGCCATCATATGTTGCTGAAACCAGTCTTATATGCAATATTATGAATGCAGCTGCAGATGAATTCT  
TTGAGTTTCAGAAAGAGCCACTTGATAACTTGGGATGGACTATTAAGAATGTGCTGTCAATGCCAATA  
GTAAACAAGAAAGAGGAAATTGTGGGAGTTGCCACGTTTTATAACAGAAAGGATGGAAAGCCATTTG  
ATGACATGGATGAAACTCTAATGGAAGCCTTACTCAGTTCCTTGGGTGGTCTGTTTTGAACACTGACA  
CATATGACAAAATGAACAAGCTAGAAAATCGGAAAGACATTGCTCAAGACATGGTTAACCATCATGTT  
AAATGCTCAAAGATGAAATACAGGACATATTGAAAACCTAGAGAAATCTATGAGCGGGAGCCAAATG  
AATGCGATGAAGAAGATCTTCAAGAGATATTGCTTGAAGAACTTCCAGATGCTGAAGAGGCAGAACTC  
TATGAATTTCACTTTTGTGATTTTGAATGGTCTCCATTGGATCTTGTGAAGTGTGGAATACAGATGTATT  
ATGAGCTAGGTGTGGTTGATAAATTCCATGTACCTCAGGAGGTATTAGTTCGTTTCATGTATTTACTGA  
GTAAAGGATACAGAAAGATCACCTATCACAACTGGCGGCACGGCTTCAATGTTGGACACACTATGTTT  
ACACTTCTCACAAACAGGAAATCTAAAATCGTACTATACAGATCTGGAGGCATTTGCCATGGTGACAGC  
TGCATTTTGCCACGATATTGATCACCGAGGAACAAACAACCTCTATCAAATGAAGTCACAGGATCCAT  
TGGCAAACCTTACGGTTCATCGATTATGGAGCGACATCACTTGGAGTTCAGTAAAACCTCTGCTCCAA  
GATGAGGATTTGAATATCTTTCAAATCTCAACAGAAGGCAATATGAACACGTACTCCATCTGATGGA  
GATTGCGATCATTGCTACAGACTTGGCACTATATTTCAAAAAACGGACAATGTTTCAAAAAGATAGTCG  
ACCTGTCTGAAACGTACGAGAACTTTGAAGAATGGGTACAATTTATGATCCTGCAGACAACAAGGAAA  
GAGATTATTATGGCCATGATGATGACTGCATGTGACCTGTCTGCCATCACAAAACCATGGGAAATACA

GAGCAAGGTAGCTCTTTCTGTGGCAGCGGAATTCTGGGAACAGGGAGATTTAGAACGGACAGTTTTAG  
AGCAGCAGCCAATTCCTATGATGGACAGAAACAAAGCTGATGAACTTCCAAAACCTCAAGTTGGTTTC  
ATTGATTTTGTGTGCACTTTTGTGTACAAGGAGTTCACTAGGTTTCATTTCGGAAATTGAGCCCATGCTC  
AGAGGCATCCTGAACAACAGAAAGGAGTGGAAAGCACTGGCTGATGAACACGAGGCTAAAGTGA  
GCGATTGAGGAAGAGAAAAAGAAGAAGGAAGAACAAGCAGCAAAGCAAGCAGCCATTGCATCA  
CAAAGGAACAAAGTTCTCAGTCTTCAACGTGTCAGCTCTTGTA

>KT749699\_PDE6A\_Reef\_shark\_56278-10-1

ATGAGTGCAACGAAAGAAGAAGTGGAGAAATTCCTGGACAGTAATCCTGCCTTTGCCAAAGAATACT  
ATGATTCAAGACTGCGATCTCTACATGTTGCTAACTTGCTGGGATCTCAACAAACAAGTATAGATGTCG  
AGACTCACCGGAAGGTAAACTGTGTGTCGAGGAAAGTGAATAATTTTTGAGCTGGTTCGAGACCTGCAG  
GATGTTAATATGGAAAAACATTGTTAATACTCAGGAGGATTACATTTCTCCTTCAAGCAGATCGC  
ATGAGTTTGTTCCTGTACAGATCCAGAAATGGCACCCCTGAACTTGCCACCAGGCTGTTCAATATTAG  
AAAGATTCTACTTTTCGAAGATTGTTTTGTTTCAGCCAGATTGTGAAATAGTTTTTCTCCTTGGACACTGGG  
ATCATTGGATATGTGGCTCAGACTAAGAAAACAATAAATGTCCACGATAAAAAGAACGGATGATCGTTT  
CTGTGACTTTGTGGATGTCCTTACAGAGTATGAAACAAGAAATGTCCTGGCAACCCCAATACTGAATG  
GAAAAGACTTAGTTGCTGTTATAATGGCTATAAACAAAATAGATGGAGATCATTTCACCACAACAGAT  
GAAGACATTTTGTAAAGTATGTCAATTTTCTCAACTTAACACTCAAGATCTACTATTTGAATTATCTCC  
ATGGGTGTGAAACCAGGAAAGGGCAGGTCCTCTTATGGTCTGCAAGCAAAGTATTTGAAGAGCTGACT  
GATATTGAGCGTCAGTTTCACAAAGCCCTGTATACAGTACGCGCCTTTTTGAACTGTGACAGATACTCA  
GTTGCACTTCTGGACATGACAAAGGAGAAGGAATTTTTTGACCTTTGGCCAGTACAAATGGGTGAGGT  
ACCACCATATGATGGTCCAAGAACACCAGATGGAAGGGAAATAAACTTCTACAAAATAATTGATTACA  
TTCTTCATGGAAAAGAGGAAATTAAGTTCATCCCGAGCCCGCCAGCAGACCATTGGGCACTAGTTAGT  
GGATTGCCAACGTACGTTGCAGAAACCAGTCTTATATGCAACATTATGCATGCTGCTGCTGACGAATTC  
TTTCAGTTTCAGAAAGAGCCACTTGATGCTTTGGGATGGACAATTAAGAATGTGCTGTCGATGCCAAT  
AGTAAACAAGAAAGAGGAAATTTGTTGGAGTTGCCACCTTTTATAACAGGAAGGATGGGAAGCCATTT  
GATGAAATGGATGAAACTCTGATGGAAGCCTTGACACAGTTCCTCGGGTGGTCCGTTTTGAACACAGA  
TACATATGACAAAATGAACAACTTGAAAATAGGAAAGACATTGCCCAAGACATGGTGCATATCAT  
GTTAAATGCTCTAAAGATGAAATACAAGACATTCTGAAAACGAGAGAAATCTATGATAGAGAACCAG  
ATGACTGTGAGGAAGAAGACCTTCAAGAAATATTGCTCGAAGAACTTCCAGATGCTGTGGAAGCAGA  
ACTCTATGAATTTCACTTTTGTGATTTTGAAGTGGTCCCATTAGACCTTGTGAAATGTGGAATACAGAT  
GTATTATGAGCTTGGTGTGTTGATAAGTTCCACATAACCACAAGCGGTGTTGGTCCGCTTCATGTATTC  
TCTGAGTAAAGGATACAGAAAAATCACCTATCACAACCTGGCGGCACGGGTTCAATGTTGGGCACACCA  
TGTTTACACTGCTCAGACTGGAAATCTAAAGCGCTACTATACAGATCTGGAGGCTTTAGCCATGGTG  
ACAGCTGCATTTTGCCATGACATTGATCATAGAGGGACAAACAACCTCTATCAAATGAAGTCACAGGA  
TCCATTGGCAAACCTTCATGGCTCATCCATTATGGAACGCCATCACTTGGAGTTCAGCAAACCCCTGCT  
CGAAGATGAGGATTTAAATATCTACCAAATCTCAACAGAAGACAGTATGAACATGTATTCCACCTGA  
TGGACATTGCCATCATTGCTACAGATTTGGCACTTTATTTCAAGAAAAGAACAATGTTTCAAAGATA  
GTGGACCTGTCAGAAACATATGAAAATGATGAAGAATGGGTGCAGTTTATGATACTGGAAACAACCA  
GGAAAGAAATTATCATGGCCATGATGATGACAGCATGTGACTTATCTGCCATCACAAAACCATGGGAA  
GTGCAGAGCAAGGTAGCTCTTTCTGTAGCAGCTGAATTCTGGGAACAGGGTGACTTGGAGCGAACTGT  
ATTAGAACAGCAACCTATTCCCATGATGGACAGAAACAAGGCTGATGAGCTTCCAAAACCTCAAGTTG  
GTTTCATTGACTTTGTGTGCACATTTGTATACAAGGAATTCACCAGATTTCAATTCTGAAATCCAGCCTA  
TGCTCAGTGGCATACTTAACAACAGAAAGGAGTGGAAAGCACTGGCTGATGTACATGAGGCAAAGT  
GAAAGCAATTGAGGAAGAGAAAGCAGAAAAAGGAGGAAGAAGTTCAGCTAAACAAGCTAATGACGT  
TTCACAAAAGCGCAAGGTTCTCAGTCTAAGACATGTTTGCTCTTGTA

>KT749700\_PDE6A\_Florida\_gar\_28213-2-3

ATGGCCGTAGTCAACGCAGAAGTGGCTGAGAAATTTTTGGACAGCAACCCTGTGTTTCGCAAGAAGTA  
CTATGACAACAAATTGCGGCCAGCGGCCATCGCCAGCTTACTGTCGTGCAAAACGATGCAGGTGGACT  
TCAGCAGCTTCCACGAGCTGACCAGCGTGGAGGAGAGCGAGATCGTGTTTCGACCTGATCCGCGACATC  
CAGGAGAACCTGCAGATGGAGAAGTCCGTCTTCAACCTGATGCGGCACCTGAGCTTCTTGCTCACGGC  
CGACCGCATGAGCCTTTCATGTTTCAGGATGCGAAACGGCACGGGCGAGCTCGCGACCCGGCTTTTCA  
ACGTGCACAAGGACGCCACGCTGGAGCAGTGCCTCGTGCCGCCAGACAGCGAGATCGTGTACCCGCTG  
GACACTGGGATCGTGGGCTACGTGGCCACCTCCAAGAAGACCATCAACGTTCCCGACGTCCTCAGAA  
CAGCAACTTCAGCGACTTCGTGGACCAGCTCACTGACTACAAAACCAAGAACATCCTGGCCACGCCCA  
TTCTGAACGGCAAAGACATGGTGGCAGTCATGATGGCGGTTAACAAAGTTGGGGCTCCACACTTCACC

GCCAAAGACCAGGAGACTTTGATGAAGTATCTCAACTTCGGCAATTTGATTTTGGAGATTTTCCATCTC  
AGCTACCTTCACAACCTGCGAAACCAGACGAGGACAGGTGTTGCTTTGGTCTGCGAGCAAAGTTTTTGA  
AGAGCTCACTGACATCGAGCGGCAGTTCCACAAGGCCCTCTATACAGTACGGGCCTTCTGAACTGTG  
ACCGCTACTCCGTAGGCCTCCTCGATATGACCAAACTAAGGAATTTTTCGATCTCTGGCCAGTGCTGA  
TGGGAGAAGTACCTCCATACTCCGGTCCCAAAACCCAGACGGCAGAGAAATTTGTGTTTTACAAAGTC  
ATCGACTATATCTTGCATGGAAAGGAAGACATCAAAGTCATTCCGAACCCACCTGCTGATCACTGGGC  
TCTTGTCACTGGGCTGCCACCTATGTGGCTGAAACCGGGCTGATTTGCAACATAATGAATGCAGCAG  
CAGATGACGTCTTTAAATTTTCAGAAAGAGCCCTTGGATGAATCCGGATGGGTGGTCAAGAATGTGCTC  
TCAATGCCCATTTGTCAACAAGAAAGAGGAAATCGTGGGCGTGGCCACCTTCTACAACAGGAAGGATG  
GGAAGCCCTTTGACGAAATGGACGAAACGCTCATGGAGTCTCTCGCCAGTTCCTCGGCTGGTCCGGTT  
CTCAACACCGACACGTACGACAAGATGAACAAGCTGGAGAACAGGAAGGACATCTTCCAGGACATGG  
TCCTCTACCACGTCAAGTGCAGGAAGGACGAGCTCCAGCTCATCTTGAACGCAAGAGGTGTACGGA  
AGAGAGCCACAGGACTGCGAGGAAGACGAGCTTTTCGCCATTCTGGAGGAAGAGCTTCCAGACCCGG  
AGGAATCTGAGATCTACGAGTTCCACTTCTGTGATTTTGACCACTCTGAGCTGGACCTGGTGAATGTG  
GGATTTCAATGTACTATGAGCTGGGCGTGGTGGATAAATTTACATCCCACAGGAGGCTCTCGTGAAG  
TTCATGTACTCCGTCAGCAAGGGCTACCGGAGGATCACCTACCACAACCTGGAGGCACGGCTTCAACGT  
GGGCCAGACCATGTTACGCTGCTCATGACAGGCGACCTGAAGCGTTACTACACTGACCTAGAGGCCA  
TGGCCATGGTAACTGCTGGGTTCTGCCACGATATCGACCACAGGGGAACCAACAACCTCTACCAGATG  
AAGTCTGGCAATCCACTCGCAAAGCTGCATGGATCTTCCATTTTGGAAAGGCACCACCTGGAGTTTGG  
GAAGACTTTGCTGAGAGATGAGGACTTAAACATCTACCAAAATCTTAACCGACGACAGCATGAACATG  
TCATTCATCTCATGGACATTGCCATCATCGCAACTGACCTGGCACTGTACTTCAAGAAGAGAGCCATGT  
TCCAGAAGATAGTGGATCAGTCCAAAACATACGATGACTGGGACAAGTGGACCCGAGTACATGATGCT  
GGAGACGACTCGGAAGGAGATTGTATGGCGATGATGATGACTGCCTGTGACTTGTGAGCTATTGCCA  
AACCTGGGAGATACAGAGCAAGGTGGCACTGTCCGTGGCGGCGGAGTTCTGGGAACAGGGGTGATCT  
GGAGAGGACCGTATTGCAGCAGAACCCCATTTCAATGATGGACAGGAACAAAGCAGACGAGCTACCC  
AAACTGCAGTGCGGTTTCATCGATTTCTGTCTGTTCTGTTTGTGTACAAGGAGTTCTCCCGCTTCCACGTG  
GAGATCACGCCCATGCTGGAACGGCTGCTCAACAACAGGAAGGAGTGGAAAGGCCCTGCAGGAGGAGC  
ACGAGGGCAAGCTGGCCAAGCTGGAGGAGGAGAAGAAGAAGGAGGCAGAGGTGGCGGGCGGCCG  
CGGCGGCCAAGCAAGCAAGCAAGCCCCAGGCCGAGTCCAAGACCTGCGTCATCAACTAG

>KT749701\_PDE6A\_Bowfin\_16830-1-2

ATGGCGGTGGTGAATCCCGATGTGGCAGAGAAGTTTTTGGACAGCAACCCTGCCTTCGCCAAGCAGTA  
CTATGACAGCAAATTCGGCCAGCAGTTATTGCCAAGCTGCTGTCCAGCAGGAAGACCGAGGTGGACT  
TCAGCAGCTTCCACGACCTGAACAGCGTGGAGGAGAGCGAGATCATGTTTCGACCTGATTCGGGACATC  
CATGAGAACTTGCAGATGGAGAAGTCAATTTTCAACCTCATGAAGAACCTCAGCTTCTGCTCAGAGC  
TGATCGCATGAGCCTTTCATGTACAGGATGCGCAACGGCACAGCCGAGCTGGCGACACGCATTTTCA  
ATGTGCACAAGGACGCAGTGCTGGAGGAATGCCTCGTACAGCCGGACAGCGAGATCGTCTACCCCTG  
GACACTGGGATCGTTGGCCATGTGGCGACCTCGAAGAGGACCGTCAACGTTCCCGATGTCACCTCAGAA  
CAGCTATTTAGTGACTTTGTGGACCAGCTCACGGACTATAAGACCAAGAGCATCCTTGCCACACCCA  
TCCTGAATGGCAAAGACATGGTGGCCGTTATGATGGCAGTTAACAAAATTGGGGCGCCACACTTCGAT  
GCCAAGGATGAACAGACTCTGATGAAGTACCTCAACTTTGCCAATTTGATTTTGGAGAGTTTTCCACCTC  
AGCTATCTGCACAACCTGTGAAACCAGAAGAGGACAGGTATTGCTTTGGTTCAGCGAGCAAGGTTTTCGA  
AGAGCTTACAGACATCGAACGGCAATTCCACAAGCGCTTTACACAGTGCAGGCCTTCTCAACTGTG  
ACCGCTACTCTGTGGGCCTCCTTGATATGACCAAAACAAAGGAATCTTTGATCTGTGGCCTATCCTGA  
TGGGCGAAGTGGCTCCATACGATGGACCAAGACTCCAGATGGCAGAGAAATCATCTTCTACAAAGTC  
ATCGACTATATATTACATGGAAAAGAAGACATTAAGTAATTCCGAACCCCTCCTGCCGATCACTGGGC  
ATTAGTTAGTGGTTTACCACCTACGTGGCTGAGAATGGACTGATTTGCAATATAATGAATGCGGCAG  
CAGATGACTTCTTTGAGTTTCAAAAAGAGCCCTTGGATGAAAGTGGTTGGATGATAAAGAATGTCTC  
TCCATGCCCATTTGTCAACAAGAAGGAGGAGATTGTTGGTGTGGCTACCTTCTACAACAGGAAGGATGG  
GAAACCCCTTCGATGACATGGACGAAACACTCATGGAGTCTCTTACCCAGTTCCTGGGCTGGTCTGTCT  
CAACACCGACACCTACGATAGGATGAACAAGTTGGAGAACAGGAAGATATCTTCCAAGACATGGTC  
CTCTACCACGTGAAGTGCAGGAAGGATGAGATTCAGAACATCCTGAAAACCAAGAGGTGTACGGCA  
GAGAACCACACGAGTGTGAAGAAGATGAACTCTTTGAAATCCTGGAAGAAGAAGTTCAGATTCTGA  
AGAATCAGAGATCTTTGAGTTCCATTTCTGTGATTTTGACCACTCGGAGTTAGAGTTGGTGAATGTGG  
CATCGCAATGTACTATGAGCTGGGTGTGGTAGACAAATTTACATCCCCCAAGAGGCCCTCGTGAGAT  
TCATGTACTCTGTGAGCAAGGGCTACAGGAAGATCACCTATCACAACCTGGAGGCACGGCTTCAATGTG  
GGACAGACCATGTTCTCGCTGCTCATGACAGGTGACCTGAAGCGTTATTTCACTGATCTGGAGGCCAT

GGCTATGGTGACAGCGGGATTCTGCCATGACATTGATCACAGAGGGACAAACAACCTCTACCAGATGA  
AGTCTGGAAATCCATTGGCCAAGCTTCACGGATCTTCTATCTTGGAGAGACACCATCTGGAGTTTGGAA  
AAGACTCTGTTAAGGGATGAGGACTTAAATATTTACCAGAATCTGAACCGACGGCAGCACGATCACGT  
CATACTTTGATGGACATTGCCATCATTGCCACTGACCTGGCACTGTACTTTAAGAAGAGGGCAATGTT  
TCAGAAGATTGTGGACCAGTCCAAAACCTACGAGAGCTGGACTGAGTGGACAGATTACATGAAGCTG  
GAGACTACCCGAAAAGAGATTGTCATGGCAATGATGATGACTGCCTGTGACTTGTGAGCTATCGCCAA  
ACCCTGGGAGATACAGAGCAAGGTGGCGTTGTCTGTGGCTGCGGAGTTCTGGGAGCAGGGTGACCTGG  
AGAGGACTGTGCTGGAGCAAAACCCCATCCAATGATGGACAGAAATAAAGCAGATGACCTGCCCAA  
ATTGCAGTGCGGTTTCATCGATTTTGTATGTTTCATTTGTGTACAAGGAGTTCTCTCGCTTCCATACGGAG  
ATCACACCAATGCTGGAAAGACTCCTGAACAACAGGAAGGAGTGGAAAGGCTCTGCAGGAGATACATG  
AAGCCAAGGTGGCCAAGATCGAAGAGGAGAAGAAGAAGAAGGAGGAGCAGGCAGCGGCCGCGCAGCGG  
CAGCCAAGGAAGCAAGCAAAGCTCAGACTCAGACCAAGACCTGCGTCATCAATTAG

>KT749702\_PDE6B\_Reef\_shark\_56278-9-1

ATGAACAGGGAGGCTGCGGAACAATTCCCTGGACTCTAATCCTGACTTTGTCAAGCAGTACTTTGCGAA  
GAAACTGTCCCCAGAAGTTGTCGCTCAGATAACGGAGCAGACTGATTCGCTCACATGACAACCTTTTC  
AGGAAATTGGGCAGGTAGAGGAGAGTGAGATTCTCTTTGATCTTGTCTGCGATATGCAGGAGAGTGTA  
AACATGGAAAAGGTGGTGTTCAAAATCTTGCGAAGGCTTTCTTTTCTGATCCACGCGGATCGAATGAG  
TCTGTTTCATGTACCGGCAGAGGAATGGCACAGGGGAGCTGGCTACCAGGCTGTTCAACATTCACAAGG  
ATGCCGTCATGGAAGACTGCCTTGTTACCCCGATCACGAGATTGTTTTCCCACTGGATATAGGGATTG  
TGGGGAGTGTGCACTCTCGAAGAAAATGATAAATGTCCAGAATGTCACTGAGTCCACGACCTACAGC  
ACCTTTGCGGATGAACTGACTGAATACCAAACAAAGTGTATACTTGCAACCCCCATAATGAATGGTAA  
AGAGGTTGTGGCTGTGATCATGGCAACCAATAAGTTAGATGGACCTTATTTTACTGAGGAGGATGAAG  
ATCTCTTCTCGAAATATCTCAACTTTGCCACTTTGAACCTCAAATCTATCATCTGAGCTACCTTCATAA  
CTGTGAAACGCGGAGAGGCCAGGTTCTTTTATGGTTCGGCAAACAAGTATTTGAAGAACTGACAGACA  
TTGAGCGACAGTTTCACAAGGCTCTTTACACAGTTAGAGCCTACCTGAACTGTGAGAGATACTCAGTA  
GGACTCCTAGACATGACCAAGCAGAAGGAATTTTTCGACTTGTGGCCTGTGCTTATGGGGGAAGTCCC  
TCCTTACCAAGGTCCCAGGACACCTGATGGCAGAGAAATAGTCTTTTCAAAAATCATTGACTACATTCT  
ACACGGAAAGGAGGAGATCAAAGTCATTCCGAGTCCACCTGCTGATCATTGGGCGTTGGTCAGTGGAT  
TGCCAACGTATGTTGCAGAACTGGCTTAATCTGCAATATCATGAATGCAGCAGCAGATGAGACATTT  
ACCTTCCAGACAGAACCCTTGATAGCTTTGGATGGACCATCAAAAATGTCCTTTCGATGCCAATAGT  
AAATAAGAAGGAAGAGATTGTTGGAATTGCCACATTTTACAACAGGAAAGATGGAAAACCTTTTGTG  
AAATGGACGAAGTTCTTATGGAATCCTTGACCCAGTTCCTTGGCTGGTCTGTTCTCAATACAGATACCT  
ATGATAAATGAACAAGCTGGAAAACCGGAAAGATATTGCTCAGGGGATGGTGCTATATCATGTCAA  
GTGCAGCAATAATGAAATTCAGAATATATTGCCAACAAGGGAAGTGTGGAAAAGAACCCAATGAA  
TGTGAAGAGGATGAACTACAGGAAATATTGAGCCAGCAACTCCCACGAGCTGAGGACTTTAATCTTTA  
TGAATTCAGCTTTAGCGACTTGGAACACACTGAAATGGATCTTGTGAGATGTGGCATTTCAGATGTATTA  
TGAGTTAAAAGTTGTGAACAAATTCATATTCCACGCGAGGTGCTAGTCAGGTTTGTGTACTCGTTAAG  
TAAGGGATACCGAAAATAACCTACCACAACCTGGCGGCATGGATTCAACGTTGGACAAACCATGTTCA  
CTCTTTTGTGACAGGTAAATTGAAACGCTATTACACAGACCTGGAAACGATGGCCATGGTAACTGCT  
GGACTCTGCCACGATATTGATCACAGGGGCACCAACAACCTGTATCAAATGAAATCCCAGCACCCACT  
GGCAAACTACACGGCTCTTCAATTATGGAACGCCATCACTTGGAGTTTAGCAAGACCTTGCTTGCCG  
ATGAGGGTTTGAACATTTTCCAGAACCTGAACAGGAGGCAATACGAGCATGTCTTTCATCTGATGGAT  
ATCGCTATCATTGCGACAGACTTGGCTCTCTACTTTAAAAGAGAAACAATGTTCCAAAAAATAGTTGA  
CCTGTCCAAAACCTACGAGGATGAGACGGCCTGGGTTGACTACATGTCACTGGAGACGACCAAGAAA  
GAGATTGTCATGGCCATGATGATGACAGGATGTGACTTGTCCGCCATCGCTAAACCCTGGGAGGTTCA  
GAGCAAGGTGGCTCTGTTAGTAGCAGCAGAATTCTGGGAACAGGGTGACTTGGAAAGAAGTGTGTTAC  
AACAGAATCCCATTCCATGATGGACAGAAACAAGCTGATGAACTCCCAAGCTTCAAGTTGGTTTC  
ATCGACTTTGTGTGCACATTTGTCTACAAGGAATTCTCTCGCTTTCATGAGGCTATTACACCGATGCTT  
GATGGAATACTCAACAACAGAAAAGAATGGAAGCAACTCGCTGACGAACATGAAGAGAAGGTGAAG  
GCCATAACAAGAAGAGAAAGAGAGGCAACTTCAGGAGATGGAAGCAAAGCAAGCTGCCGCCGCCGCTG  
CCAGCGCAGAGAAGGCTCAGTCCAAAACCTTGCTGCGTGTGTTAA

>KT749703\_PDE6B\_Bluespot\_ray\_35760-5-1

ATGAACAAGGAAGATGTGGCGAAGTTCCCTGGACGCCAATCCTGCTTTCACCAAGCAGTACTTTGAGAA  
GAAACTGCGCCCCGAAGTTGTCGCCCAGATGCTGCCCAGGACAGACTCCACTGCTGATATCACAACCT  
TCCGGGAAATAAGCCAAGTGGAAGAGGGGGAGATTCTCTTCGATCTCATCCGGGATATGCAGGAGAG

CATAAACATGGAAAAAGTGGTGTTCAAAACGTTAAGGAGGGTCAGTTACCTGATCCACGCCGACCGA  
ATGAGTCTCTTCATGTACCGGCAGAGGAACGGCATCGGGGAACTAGCCACCAGGCTGTTCAACATCCA  
CAAGGATGCCGAGATGGAAGATTGTTTTGTGCATCCAGACCATGAGATTGTCTTTCCACTGGACATGG  
GCATTGTAGGGAATGTTGCCAGACCAAAAAAACTGTTAACATCCCTAACGTGGCTGAGTCCAGCTTT  
TACAGCAGTTTTGTTCGACACGCTGACTGAGTATGAAACAAAGAGTGTGCTTGCAACTCCTATCATGAA  
TGGGAAGGATGTTGTCGCTGTGATAATGGCAACCAATAAAACAGATGGATCTCATTTCCTGAAGATG  
ATGAAGATCTTTTCTTCAAATACCTCAACTTTGCCAGTTTGAACCTCAAATCTATCATCTGAGCTACC  
TTCACAACCTGTGAAACCAGAAGAGGCCAGGTTCTTTTATGGTTCGGCTAACAAAGTATTTGAGGAGCTG  
ACAGATATTGAGCGCCAGTTTCACAAGGCTCTTTATACAGTGAGAGCTTACCTGAACTGTGAGAGATA  
CTCAGTTGCACTGCTAGACATGACCAAGAAGAAGGAGTTCTTTGACCTGTGGCCTGAACAGATGGGTG  
AAGTTCCTCCCTACCAAGGTCCCAGGACACCAGATGGCAGAGAAATAATCTTTCACAAAATCATTGAT  
TACATCCTACATGGGAAGGAGGAGATTAAGGTCATTCCGACTCCTCCTGCTGATCACTGGGCCTTGGTT  
AGTGGACTGCCAACTTACGTTGCGGAAACTGGCTTAATCTGCAATATCATGAACGCAGCAGCTGATGA  
AACTTTCAGCTTCCAGACTGAACCTTTGGATAGCTTTGGATGGACCATCAAAAATGTCCTTTCAATGCC  
AATAGTAAACAAGAAGGAAGAGATTGTTGGAATCGCTACATTTTACAACAGGAAAGATGGGAAACCT  
TTTGATGAAATGGACGAAGTTCTTATGGAATCCTTGACCCAGTTCTTAGGCTGGTCTGTTCTCAACACG  
GATACATACGATAAAATGAACAAGCTGGAACATCGGAAAGACATTGCCAGGGAATGGTGCTGTATC  
ACGTGAAATGTAGCAAGGATGAAATTCAGGACATATTGCCAACAAGGGAATGTTTTGGAAAAGAGCC  
CAATGAATGTGAAGAGGAAGAATTGCAAGAGCTCCTGGACCAGCAACTTCCTCCACCAGAGCAGTTTG  
ACCTTTATGAATTCAGGTTTAGCGATTTAGAATTTGCTGAGATGGATCTTGTGCGGTGTGGCATTGAGA  
TGTAATGAATTAAGTTGTGAACAAATTCATATTCCACGTGAGGTGCTAGTCCGATTTATTTATT  
CATTAAAGTAAAGGATATCGAAGAATTACATACCACAATTGGCGCCATGGGTTCAACGTTGGACAGACC  
ATGTTCACTCTTCTGATGACCGGTAAGTTGAAACGGTATTACACAGACTTGGAACACTGGCCATGTTA  
ACTGCAGGACTTTGCCATGATATTGATCACAGGGGGACCAACAACCTTGTACCAGATGAAATCCCAGCA  
CCCCTAGCAAACTTCACGGCTCTTCAATTATGGAGCGTCATCACCTGGAGTTTAGCAAAAACCCTACT  
TGCCGATGAGACATTGAACATATTCCAGAACTTGAACAGGAGGCAGTATGAACATGTCCTACGCCTGA  
TGGACATTGCTATTATTGCTACAGACTTGGCTCTCTATTTTAAAAAAGAACAATGTTTCAAAAAATTG  
TTGACCTCTGCCAGACTTATGAGGATGAAAAGGTATGGGTAGAATATATGTCTCTGGAGAACACCAAG  
AAAGAGATTGTAATGGCCATGATGATGACAGCATGTGACTTGTGAGCCATTACCAAACCCTGGGAGGT  
TCAGAGCAAGGTGGCTCTTATGTTGGCGGCTGAATTCTGGGAACAGGGAGACTTGGAACGGACTGTAT  
TGCAGCAAAATCCTATTCCTATGATGGACAGGAATAAAGCTGATGATCTACCCAAACTTCAAGTTGGT  
TTCATCGACTTTGTGTGTACATTTGTCTACAAGGAATTCTCTCGCTTTCATGAGGCTATCACACCAATGC  
TCAATGGTCTGCTCAACAACAGAAAAGAATGGAAAGTACTTGCTGAAGAACATGAGATGAAAGTTAA  
AGCTTTGGAGGAAGCAAGACAAAAGAAAGCAGAAGAGTTAGAAGCAAAGAAAGCAGCTGCTGCTGCT  
GCTGCAGCAGAGAAGGCTCAATCCAAAAGTTGTTGTGTGTTGTAA

>KT749704\_PDE6B\_Florida\_gar\_28213-1-1

ATGAGTGTCACTCAGGAAGACGTGGAGAAATTCCTTGATGGAAACCCGGATTTACCAAGCATTACTT  
TGATAAAAAGTTGAAGCCTGGGACAATTTCTGCCATTCTTGGCCAAACACAGGTGCAGGTGGATTTCA  
CTTCTTTTAAAGGAACTCAGCCAGGTGGAGGAAAGCGAAATTTTGTGTTGAGCTCATCCGAGACATGCAG  
GAGAGTATCAACATGGAGAAAGTTGTCTTCAAGACCCTCAGGAGGATCAGCTTCCTCATCCATGCGGA  
CCGCTGTAGTCTCTTTATGTACCGTCAAAGGAATGGTATAGCCGAGCTGGCTACCCGGCTTTTCAACGT  
CAATAAGGACGCAGTCATGGAAGATTGCCTAGTGCAGCCAGACAGTGAGATAGTCTTCCCACTGGACA  
TTGGGGTGGTAGGAAACGTTGCCCAAAGCAAGAAAACCTATTAATGTTAAGGATGTTTCACAGTGCAGC  
CAATACAGCCATTTGTGGATGATCTCACAGACTACAAAACCAGAAACATTCTGGCCACCCCAATCAT  
GAATGGCAAGGATGTGGTGGCAGTGATAATGGCAGTGAACAAAATAGACGGGCTTACTTCACCGAG  
GAAGATGAGGATCTTTTTTTAAAGTATCTAAATTTTGCCTCTTTGAACCTCAAGATCTACCACCTGAAC  
TACCTGCACAATTGTGAAACACGTAGAGGACAAGTCCTGTTGTGGTCTGCGAACAAGGTGTTTGGAGG  
GCTGACAGATATCGAGCGACAGTTTCACAAAGCCCTGTACACAGTGCGAGCGTATCTCAACTGTGACA  
GATACTCAGTGGGGCTGTTAGACATGACAAAAGAAAAGGAGTTCTTTGATGTGTGGCCTGTTCTCATG  
GGTGAAGTACCTCCTTACTCTGGGCCTGTAACACCAGATGGAAGGGAAATCATTTTTTTACAAAGTCATT  
GACTATATTCTGCATGGAAAAGAAGAAATTAAGTTATCCCGAATCCACCAGCAGATCACTGGGCTTT  
GGTTAGTGGACTACCAACCTATGTTGCTGAAAGTGGCTTTATCTGCAACATCATGAATGCAACCTCAG  
AGGACATGTTCAAGTTTCAGGCAGGACCTCTGGACGAAAGTGGCTGGACAATCAAGAACGTGTTGTCA  
CTGCCATTGTGAACAAGAAAGAAGAGATTGTGGGAGTGGCCACTTCTACAACAGAAAAGATGGCA  
AACCATTTGATGAACAGGATGAAACTATCACAGAGTCTCTGACACAATTTCTGGGCTGGTCTGTGCTC  
AACACAGACACCTACGACAAGATGAATAAGCTAGAGAACAGAAAGGACATTGCCAGGACATGGTGT

TGTATCATGTGAAGTGCAGAAACGATGAAATTCAGAATATTCTGAAAACAAGAGAAGTTTATGGGAA  
GGAGCCTGCCGACTGTGATGAGGAAGAAGCTTTCTTACATACTGAAAAAAGAGCTCCAGACCCAAGG  
AAATTTGAAATCTACGAGTTCCGGTTCTCAGATTTTGACTGCACAGAAGCTAGAGCTTGTGAAATGTGGC  
ATCAAGATGTACTATGAGGTTGGGGTGGTGAATAATTTTACAGATTCCACAGGAGGTCTTGGTGCATG  
CATGTATTCGGTCAGTAAAGGGTACAGAAAGATCACCTACCACAAGTGGCGCCATGGTTTCAATGTTG  
GACAAACCATGTTACACTGCTGACAACAGGGAAGTTAAAGAGGTACTACACTGATCTGGAGGTGATG  
GCAATGATCACAGCTGCTTTCTTGCATGATATTGATCACAGAGGGACAAACAATCTATAACCAGATGAA  
ATCACAAAATCCACTGGCAAAGCTCCACGGCTCGTCCATCCTTGAGAGGCACCATTTAGAATTTGGCA  
AGTTTTTACTTTTACAGAAGAGTCTTAAACATTTACCAAAACCTGAACAGAAGACAGATAGAACATGTA  
ATCCACCTTATGGATATTGCCATTATTGCAACAGACTTGGCACTTTATTTCAAAAAGAGGACCATGTTT  
CAGAAAATTGTTGACTTGTGCAAGACTTATGAAAATGAAAAGGAGTGGGTAGATTTCTTATCACTGGA  
GACAACAAGGAAAGAAATTGTGATGGCCATGATGATGACTGCATGTGACTTATCAGCCATTACAAAAC  
CATGGGAAGTACAGAGCAAGGTGGCTTTGTCTGTAGCAGCAGAATTTCTGGGAGCAGGGTGTATCTGGA  
AAGGACTGTGCTACAGCAGAATCCCATTCCATGATGGACAGAAATAAAGCAGCTGAACTCCCGAAGC  
TCCAGTGTGGTTTCATTGACTTTGTCTGCTCCTTCGTGTACAAGGAGTTCTCCAGGTTCCATGATGCCAT  
CACTCCCATGTACGATGGCCTGATGAACAACAGGAAGGAGTGGAAAGGCCAGGGCAGATGAGTATGAG  
GCCAAAATGAAGGCTATTGAAGAGGAGAAGAAAAGGAAGGAGGAAGAAGCAGCAGCTGCTGCTGCA  
AAGAAAGCGGCCAGTGCAAACCCTAGCGGAGGTTACAGTCTAAGACATGCTCCGTTAGTTAA

>KT749705\_PDE6B\_Bowfin\_25775-2-1

ATGAGTGTCACTAAGGAAGACGTGGAGAAGTTTCTCGATGGGAACCCACAATTTGCCAAGGGCTACTT  
TGACAAAAGCTGAGACCAGGGGCGATCGCCGCTGTTCTGGGGCGCCAGGAGCCCTTGGTGGATTTTG  
CTTCTTTTAGGGAAGCTCAGCCAGGTAGAGGAAAGCGAAATTTCTGTTTGTGAGCTCATCAGAGACATGCAG  
GAGAGCATCAACATGGAGAAAGTGGTCTTCAAGACACTCAAGAGGATCAGCTTCCTCATCCACGCCGA  
CCGCTGCAGTCTTTCATGTACCGCCAAAGGAATGGAGTAGCAGAAGTGGCCACACGGCTGTTTAAAG  
TCAATAAGGACGCCATCATGGAAGATTGTCTCGTATCCCCGGACTGTGAGATTGTCTTCCCTTTGGACA  
TGGGGGTGGTGGGATATGTGCGCCAAACCAAGAAAACCATCAACATCAAGGATGTTAAAGAGAGCAG  
CCACTTCAGTTCATTTGTGGATGATTTGACGGAATACAAAACCAACAATATCCTTGCAACACCCATCAT  
GAACGGCAAAGACGTGGTGGCAGTGCATGGCGTTGAACAAAATTTGACGCACCTCACTTCACAGATG  
AGGATGAGGATCTTTTTTTGAAATATTTGAATTTTGTCTTCTTAAACCTGAAGATATAACCATCTGAGTT  
ACCTGCACAAGTGTGAGACACGCAGAGGACAAGTTTTGTTGTGGTCTGCGAACAAGGTGTTTGAGGAG  
CTGACCGATATTGAGAGACAGTTTCACAAAGCCTTGTACACAGTGTGAGAGCGTACCTGAACTGTGACAG  
ATACTCAGTGGGGCTTCTAGACATGACAAAAGAAAAGGAGTTCTTTCGATGTATGGCCTGTCCTCATGG  
GAGAAGTGCCACCTTATACTGGGCCTGTTACGCCAGATGGAAGGGAAATAATTTTTTACAAAGTCATT  
GACTACATTCTTCATGGGAAAGAAGACATTAAGTTATTCCGAGTCCACCAGCCGACCATTGGGCTTT  
AGCTAGTGGTCTGCCAACATATGTAGCTGAAAGTGGTTTTATTTGCAACATCATGAATGCAGCCTCGG  
ATGAGATGTTCAAGTTTCAGAAAGAGCCTCTGGACAGCAGTGGCTGGACGATCAAAAACGTCCTGTCA  
ATGCCCATTTGTGAACAAAAAAGAAGAGATAGTTGGAGTTGCCACTTTCTACAACAGAAAAGATGGCA  
AGCCTTTCGATGAGCAGGACGAGACCATTATGGAGTCTCTAACACAGTTTCTTGGCTGGTTCAGTTCTGA  
ACACTGACACCTATGACAAAATGAACAAGTTGGAAAACCGAAAGGATATCGCTCAGGACATGGTACT  
CTACCATGTCAAATGTCGCAATGACGAAATTCAGAATATTCTGAAAACACGGGAATACTTTGGGAAGG  
AGCCTGCAGAATGTGAAGAGGAGGAGCTTGGCGAGATTCTGAAAAAAGAGCTACCTGGGAAAACCAA  
ATTTGAAATCTACGAGTTCCGGTTCTCAGACTTTGACTGCACAGAAGTGGAGCTGGTAAAATGTGGGA  
TTCAGATGTACTATGAGGTTGGGGTGGTCAAAAATTTCCAGATTCCACAAGAGGTCTTGGTAAGATTC  
ATGTATTCAGTCAGTAAAGGATACCGGAAGATTACCTACCACAATTGGCGCCATGGCTTCAATGTTGG  
CCAAACAATGTTTACATTGCTGACGACGGGGAAGCTAAAGAGGTATTACACAGATCTGGAGGTACTGG  
CAATGATTACAGCTGCTTTCTTACATGATATAGACCACAGAGGAACGAATAACCTGTACCAGATGAAA  
TCACAAAATCCACTGGCTAAGCTCCATGGCTCATCCATTCTAGAGAGGCACCATTTAGAATTTGGCAA  
GTTTTTGTCTCTCGGAAGAGTCTTTAAACATTTATCAAAAACCTAAACAGAAGACAGATCGATCATGTCAT  
TCATCTCATGGATATCGCCATTATTGCCACAGATTTAGCACTTTATTTCAAAAAGAGGACAATGTTCCA  
GAAAATCGTCGACTTGTCAAAAACCTATGAAGATGAGAAGAAATGGGTAGATTACCTGTCACTAGAG  
ACAACAAGGAAAGAGATTGTGATGGCCATGATGATGACTGCATGTGACTTATCTGCTATTACCAAACC  
TTGGGAAGTACAAAGCAAGGTGGCTCTGTCTGTAGCAGCTGAGTTCTGGGAGCAAGGTGACTTGGAAA  
GGACTGTGCTCCAACAGAACCCCATTTCCATGATGGACAGGAACAAATCAGCTGAACTCCCAAACTC  
CAGTGTGGTTTCATTGACTTTGTCTGCGCCTTTGTCTACAAGGAGTTTTCTCGTTTCCATGAAGCGATCA  
CGCCATGCTCGATGGCCTGATGAACAACAGGAAGGAGTGGAAAGCCAGGGCTGACGAGTATGATGC  
CAAAATGAAGGCTATTGAAGAGGAGAAGAAGAAAAGGAGGAGGCTGCAGCTGCAGCCATGCAAGC

TAATGCAAATGCTAAAGGAGCTTCTCAGTCCAAGACCTGCTCTATCAGTTAA

>KT749706\_PDE6C\_G.\_australis\_58598-2-1

ATGGCTTCGTTAAACAAGGACGACGTAGCTCAGTACCTGGAAGCCAACTTGAATTTCGCGAGGGAGTT  
TTTCGACAGGAAGATCAGGCCGGAGGTCGTGGCGAAATTAAGTACTGACTCCGCTCAAGTCGGCTGCCGGGG  
GTGACGCGAAAGCTCCGCTCCTGTTGTCGTTGAGCGAAGCCGCGCGGCTTCAGGAAGCTCAGTTTCTC  
GTCGAACTGATGAGGGACACGGCGAGTAGTATCGTGGCGGACGCGCCTCAAGCGGCGCCTCCGGCCG  
CGGCTTTGGCGTCGGTAGCCATCGCGTCTCAAACGCCGGGCAAACCCTCGGACATGGAGATGGTTTTTC  
TTCTCGCTGCTGCAGCGGCTGGTCGGCCTGTCCGGAGCCGAGCGCGGAAGTTACTTCATTTACCGCCAG  
AGGAACGGCGTTGGCGAGGTGGTGACGCGCTTCTGGACGTGAAGCCGGAGTCTCGCGTCGGCCAGTG  
CCTCGTGCCTCCGAGCGGCGAGGTCGTCATGCCATCGACATGGGCATCGTCAGCTGGGTCGTGCAGA  
CCAAGAAGCCCTGCAATGCCGCCGACGTCACCAAGGACAAACACTTCTGCGACTTCGTGGACAAGCAG  
ACCGGCTTCCAGACCAAGAGCATCCTGTGCCTGCCGGTGTTCACGGAAAGGAGGTCATCGCAGTCGT  
GAACCTCGTCAACAAGACCCGGAGGATTCAGCAGTGAGGACGAGCAGTTGCTCGTTAACTACCTGGACC  
TGGCGTCTCTCTGCATCAAGACGGAACATCTCAACTACCTCTACAACGTGGAGGCACGGCGAGCGCAG  
TGTCTGCTGTGGTCGGCGAATAAGGTGTTTGAGGAGCTCACAGACATCGAGAGACAGTTCCACAAAGC  
CATGTACACCGTCAGGGGGTACCTGCAATGCGAGAGGTTCTCGGTCGGACTCCTGGACATGACCAAAG  
GAAAGGAATTCTTCGACGAGTGGCCGATCAAACCTGGGAGAAGTGGAGCCTTATAAAGGCCCAAGAC  
GCCGGATGGACGGGAAGTCATCTTCTACAAAATCATCGACTACATTTTAATCGGAAAGGAAGAGATCA  
AAGTTATCCCGACGCCTCCTATCGACCACTGGTCGCTAGTGAGCGGCCTGCCCGTCTACGTTGCCGAGA  
ATGGATTTATCTGCAACATGATGAACGCGCAAGCCGATGATTTCTTACGTTCCAGAAGGGGCCGGTG  
GACGATACGTCGTGGGAGATCAAGAACGTGCTGTCGCTGCCGATCGTGAACAAGAAGGAGGAGATCG  
TGGGCATCGCCACGTTCTACAACCGCTGCGACGGGAAGCCCTTCGACGAGTCCGACGAGATGATCATG  
GAGGGCCTGACTCAGTTCTGGGCTGGTCAGTTCTGACAACTGACACCTACGACAAGATGAACCATCT  
TGAGAATCGCAAAGCTATCGCAACCGAGATGCTCATGGTCCATAACAAGTGCACCTTCTGACGAGCTAC  
AGAAGGTCTTGAAAACGCGGGAAAAGAAGAGCAAAGAGGTGGCGGACTGCTCGGATCAGGAGCTCA  
AACAAGTCCTGATGGCAGACTTACCAGATCCCGTAGCGATGGAACCTTACGAGTTCCACTTCAGTGAT  
CTCCCCGTCACCGAGTTGGACCTGGTACGCGGAGGTATCCGTCTCTTCTGCGAACTCGGCGTCATCGAG  
AAGTTCAAGATACCTGCAGACGTGCTGGTGCCTGGATGTACACGGTGCACAAGGGCTACCGACCAAT  
CACCTACCACAACCTGGCGACACGGCTTCAACGTGGGGCAGACCATGTTACGCTGCTCATGACCGGGC  
GTCTCAAAAAGTACTACTCCGACCTAGAGGCGTTTTCGATGCTCACTGCGGCATTCTGTACGACATCG  
ACCACCGTGGGACCAACAATCTCTACCAGATGAAGTCGGCGTCCCCCTGGCGCGCCTCCACGGCTCC  
TCCATCTTGGAGCGACACCATCTTGAGTTCAGCCGGAGCCTCCTCACTTACGAGGACATCAACATCTTC  
CAGAACCTGAACAAGCGACAGTTGGAAACTGTCAATCACCTCATGGAGATAGCGATCATCGCCACTGA  
CCTCGCTCTCTACTTCAAGAAGCGAACGATGTTCCAAAACATCGTGACGGCGTGCAGAGGCCATGGCCA  
CGGAGCAAGAGCAGATACAATACGTACGGCCGACCCACCAAGAAGGAGATCATCATGGCCATGAT  
GATGACCGCATGTGATCTGTGCGCCATCACGAAACCCTGGGAGGTCCAGAGCCAGGTGGCACTTCTGG  
TTGCCAATGAATTCTGGGAGCAAGGAGACCTGGAGAGGGAGGTTCTACAGCAACAGCCAATCCCAAT  
GATGGACCGGAACAAGTCTGAGGAGCTTCCCAAGTTACAAGTCGGCTTCATCGATTTCTGTGTGCACCT  
ATGTTTATAAGGAGTTCACGCGGTTCCACAAGGAGATCAAGCCGATGCTGGACGGCCTGCTCAACAAC  
CGCGTGGAGTGGAAGGCCCGCGGAGACATCTACGACGAGAAGATGAAGGCCATCGAGGAGGAAAAG  
CAGAGGGTCGAGGCTGCCAAGACCAATGGACACACTGGGACGGAGACTGCTGTTGAAAAGTCAAAGA  
GCTGCGTCCTTCTCTGA

>KT749707\_PDE6C-Partial\_M.\_mordax\_41637-1-1

GCGAAGGCCGGCGGCCGCGCCACGCCGATGGAGGAGGCCTTCTTCTGCATGCTCCAGAGGATCGTCCG  
CCTCTCGGGGGCTGAGCGGGGCAGCTACTTCATCTACCGGCAGCGGAACGGAGTGGGCGAGGTGGTG  
ACGAGGTTTCATGGACGTGAAGGTGGACTCTTGCCTGGAAGCCTGCGTAGTCGACCCGTGGAGCGAGAT  
CGTCATCCCCCTGGACATGGGCATCGTGAGCAGATGCGTGCACAGCAAGGCGATGGTGGTGGTGAACG  
ATGTGAGCCAGGACAAACACTTCTGTAATTTTCGTCGATCTCCAGACGGGATTAGAGACCCGGAATCTC  
CTCTGCGTCCCCGTCCTCGCATGGTACCGAGGTGATCGCTGTGGTGAATCTTCTCAACAAGCCCCAGGGG  
TTTCGTGACAATGACCAGAAGTTGGTCTCCGACTACATGAACATCGCGTCTCTGTGTCTCAAGACTCAA  
CATCTGAACTCCTTGATAACGTGGAGGCTCGACGTGCACAGGCTCTTCTTTGGTCAGCCAATAAGGTA  
TTCGAGGAACTCACGGACATCGAGAGGCAGTTCCACAAAGCCATGTACACTGTACGCGGCTACGTACA  
GTGCGAGAGGTTCTCAGTTGGACTCCTGGATATGACCAAGGGCAAGGAGTTTTTTGATGAATGGCCAA  
TCAGACTGGGAGATGTTCTCCATAACAAGGGACCCAAGACTCCAGATGGACGGGAAGTCAATTTTTAC  
AAAATCATCGACTACATTTTAATTGGGAAGGAGGAGATCAAAGTTATCCCAACTCCTCCCACAGACCA



CTGGACGCTAGTGAGTGGTTTGCCCGTGTGGTGGCTGAGAATGGATTTATCTGTAATATGATGAACGC  
TCGCGCCGATGAATATTTCAATTTCCAGAAAGGAGCGGTGGACGATACCGGGTGGGAGATTCTCAATG  
TTCTCTCTCTACCAATCGTGAACAAGAAGGAGGAAATTGTGGGCGTGGCCACATTCTTCAACCGTTGTG  
ACGGAAAACCTTTTGACGAGAGTGATGAGATTATTCTGGAGAGCCTGACCCAGTTCTTGGGTTGGTCA  
GTCCTAACGACTGACACATACGACAAGATGACCAGTCTGGAGAATCGCAAGGAGATTGCGACGGAGA  
TGCTGATGATTCACAACCTGTGCAGTGCCGATGAGCTTCAGGAGGTCTGAGAAGCCAGGAGCTCGCA  
GACAAAGCGGTCAACGACTGCACTGAGCTCGAACTGAAGGAGATGCTGTTGTTCGGATCTTCCGGACGC  
TCGCTCCACGAACCTCTACGAGTTCCACTTCAGTGACCTCGAGGTCTCCAGCTCGATCTCGTTTCGCTC  
GGGAGTTCGACTCTTCTAGAGCTGGACATTATCGAGAAATTCAAGATTCCCATCGATGTCTTGGTACG  
GTGGATGTACACCGTGAGTAAAGGTTACCGATCCATCACCTACCACAACCTGGAGGCACGGATTCAACG  
TGGGCCAGACCATGTTACCCCTACTCATGACCGGGCGTCTCAAGAAATATTATTTCGGACCTGGAGGCG  
TTTGGCGATGCTGACAGCGGCGTTTTGTACGATATCGATCACCGTGGAAACGAATAACCTGTACCAGAT  
GAAGTCTGCGTCTCCCCTGGCTCGTCTCCACGGTTCCTCTATTCTGGAGAGACATCACCTCGAGTTCAG  
CCGCAGTCTCCTCACCTACGAGGAGATCAATATTTTCCAGAATCTGAGCAAGAGACAAGTGGAGACGG  
TGAATCGGCTCATGGAGATCTCGATCATCGCTACAGATCTGGCTCTCTACTTCAAGAAACGTACGATGT  
TCCAGAACATTGTGACAGCTTGTGAATCAATGGAAACGGAGTCTGAGAGAATTAATATATAACGTCT  
GACCCTACCAAGAAAGAGATAATCATGGCCATGATGATGACTGCGTGTGATCTGTCAGCCATCACGAA  
ACCATGGGAGGTTTCAGAGTCAGGTCGCTCTTCTGGTCGCCAATGAGTTTTGGGAGCAGGGAGATTTGG  
AGCGAGAAGTTCTACAGCAGCAGCCGATCCCCATGATGGATCGGAACAAATCGGATGAACTTCCAAA  
ATTACAAGTGGGGTTCATTGACTTTGTGTGTACATTTGTGTACAAGGAGTTCACGCGGTTCCACGAGGA  
GATTCGGCCAATGCTGGACGGACTTCTGAACAACCGCGTTCCTGGAAGGCCCGCGCAGAGGCCTACG  
ATCTCAAGATGAAGGCCCTCGCCGAGGAGCAGGAGGAGCAGGAGGCCGAAGAGGAGTGGCGAGGCCGA  
AGGCCAATGGGATGCCAGCAACAACCTACAGCAGTAGAGAAATCGAAGACCTGCGTCTCTCTGTGA

>KT749708\_PDE6C\_Bamboo\_shark\_44818-1-2

ATGGCCAACATGGGGGGTGTAAACAAGGAAGCAGTCGAACAATACTTGGAGAACAACCCACAATTTCG  
CCAAGGAATACTTTGACAGGAAGCTCAGGCCAGAAACAATTAGTGCAATCTTCAATGGGGCAAAGGT  
GGAATTGGGGGTCAGGGCTTCCTTCAAAGACCTGTCCAAGCTGGAGGAGTCCGACATTATCTTTGAGC  
TGGTCAAGGAGCTGCAGAATGACTCCAATGTTCGAGAAGCAGATACACAAGATACTGCAAAGGATTGT  
CTCCCTGGTTCAGTGCAGGACAGAGGCAGCTTGTTCACATTCAGATCAAGGAATGGCATTGCAGAGCTGG  
CCACACGACTGTTCAATGTGACCAGAGACTCCAGCTTTGAGAATAATCTTGTGCTTCCCCAAGGCGAG  
ATTGTTTTCCCATTTGGATATCGGGGTAGTGGGATGGACAGTAAAAACCAAGAAGATACAAAATATTCC  
TGACGTTACAAAGGATGTCCACTTTTCTGAATTTGTTCGATAAACAGACTGGCTACACAACCTTCTAACAT  
GTTAGCTGCCCTTTGATGCAGGGGAAGGAGATATTAGCCGTCGTAATGGTGTGATCAACAAAATTGGTG  
AACTACAATTCACCAAAGAAGACCAGGAGGTTTTTACAAAATACCTTAGTTTTGCATCTTTAGCACTGA  
AATACTCACATTTGAGTTACCTGTACAACGTGGAAAGCCGACGATCCCAGATCCTTCTGTGGTCTGCCA  
ACAAGGTATTTGAAGAACTTACAGACATTGAACGTCAATTTACAAAGCTCTATACACAGTTCGCGTTC  
ATTTAAATGTCGAAAGATACTCAGTTGCTCTTCTGGACATGACTAAGCAAAGGAGTTCTTTGACGAA  
TGGCCAATCAAGATGGGTGAGGTCCCTCCTTACAAAGGCCCGAAGACCCAGACGGCAGAGAAATCC  
ACTTTTATAAGATCATTGACTACTTGTGGTGGGGAAAGAGGAAATCAAAGTCATCCCGTCACCTCCTG  
CAGATCATTGGTCCCTTGTAAAGTGGGCTGCCAACGTATGTTGCTGAAAATGGCTTTATCTGTAATATGA  
TGAACGCACCAGCTGATGAATTCTTCACTTTTCAAAGAACCTGTGGATGAAACTGGCTGGATTATA  
AAAAATGTCTTGTTCATTGCCGATTGTGAATAAGAAAGAAGAGATAGTGGGAATAGCTACATTTTACAA  
CAGGAAAGATGGGAAGCCGTTTGTGATGAGTACGATGAACAGATCACCGAAACCTGACACAGTTCCTG  
GGATGGTCGCTTCTGAATACAGACACTTACGACAAAATGAATAAACTAGAAAGCAGGAAAAATATTG  
CTTCGGAAATGCTAATGTATCATTCTAAGTGCACCGACAAAGAACCTCAGACCATTTTGAACAAAA  
GAGATGTTGGACAAAGATACTGCAGATTGTGAACAAAAAGATATGCTAAAGATCTTGCAAGAAGAAC  
TACCTGACCCAACTGATGTTGAACTCTATGAATTCCTTTCAGTGACTTGGATGTTTCAGAATTTGATC  
TAATCAAGTGTGGAATTCGGTGCTTCTTTGAAATAAATGCAGTCATAAAGTTCAAGATACCAGCAGAT  
GTATTGACCCGATGGATGTACACTGTCCGAAAAGGTTACCGTGATATTACCTACCACAACCTGGCGCCA  
TGGATTCAATGTGGGGCAAACCTATGTTTACACTTCTCATGACAGGTAATAAAGAAGTACTACACGG  
ATCTTGAAGCTTTTCGCTATGATTACAGCAGCATTTTGTTCATGATATTGATCACCGAGGCACCAATAATT  
TATACCAGTTAAAATCACAAGCAGCTTTAGCAAAATTACATGGGTCTTCGATTTTGGAAAGGCATCAC  
CTTGAATACAGTAAAACATTACTTCAGGATGAGAGCTTAAACATTTTTCAGAACCTGAATCAACGTCA  
ATATGAAACAGTCGTCATTTAATGGAAGTTGCGATAATTGCTACTGACTTGGCCTTGTATTTCAAGAA  
AAGGACAATGTTTCAGAAAATTGTAGACTATGTTGAAAAATCAGAGACTGAAGAAGAAGCAATAAAG  
TATATTTCTTCTGATCCAACCAAAAAAGAAATTGTTATGGCAATGATGATGACAGGATGTGACTTGTCA

GCCATTACTAAGCCATGGGAAGTACAAAGCAAGGTTGCACTTATGGTTGCTAATGAATTCTGGGAACA  
GGGCGATCTGGAACGAACAGTTTTACAGCAACAACCTATCCCAATGATGGACAGAAACAAGCAGAT  
GAACTCCCAAGTTACAAGTTGGTTTCATCGACTTTGTGTGTACCTTTGTGTACAAAGAATTTCAAGA  
TTCCACAAAGAAATAACACCAATGTATGAGGGACTCCAGAACAACAGAGTTGAATGGAAATTACGAG  
CTGACGAATACGATGCAAAGATGGCTTTGATTGAAAAACAAAGGAAGGAACAAGAAGAAATGGCAGT  
GAAAAAAGCAGTGAATGGAGAAGTTGAAGCTGGAGATGAAGGAAAGGAAGGCAAACGTGGTGAA  
ATCCAGGACATGTGAAATATTTTAA

>KT749709\_PDE6C\_Bluespot\_ray\_34454-1-2

ATGGGAGACGTTAGCAAAGAGGCAGTCGAGCGATATTTGGAGAACAACCCACAGTTTGCCAAGGAAT  
ATTTTGACAGGAAGCTCAGGCTGGAGTCGATCAGTGCCTTCAACGGCACGAAGGTAGAGTTAAAG  
GACGGAGCTTCCTTCAGGGACCTGTGCAAGTTGGAAGAGTCTGACATTGTGTTTGAGCTGGTCAGGGA  
GATGCAGGATGTCTCCAATGTAGAGAAGCAGATGCACAAGGTAAGTGCAGAGGATTGTGACCCTGGTCA  
ATGCAGACAAAGGAAGCATGTTTCGTGTACAGGTCGCGGAACGGTGTGCTGAACTGGCCACCAGACTT  
TCAATGTGACCCGAGACTCCAGTTATGAGAGCAATCTAGTGGCATCAGAGGCAGAGATAGTTTTTCC  
ATTGGATATGGGGGTAGTGGGATGGACTGCACATACCAAGAGGGTGCAGAATATTGCTGACGTTCAA  
AGGACATCCATTTTTCTGCATTTGTTGATAAACAGACTGGGTACACGACCTTGAACATCCTAGCTGCTC  
CTATGGTACAGGGGAAGGAAGTATTAGCAGTTCTGATGTTGGTCAACAAAATTGGGGAGCCACAGTTC  
ACAAAAGAAGACCAAGAGGTTTTACAAAAGTATCTGAATTTTGCATCACTAGCACTGAAATTCTCCA  
TATCAATTACCTCTACAATGTGGAACAGCGAAGGTACAGATTCTGCTATGGTCTGCTAACAAAGGTGTT  
CGAAGAATAACAGATATTGAGCGTCAATTTACAAAAGCTTTGTACACAGTTCGACTTTATTTAAATGT  
TGAAAGATATTCGGTTCGCTCTGCTGGATATGACCAAACAAAAGGAATTTTTTGATGAATGGCCAATCC  
TAATGGGTGAAGTCCCCCTTACAAAGGTCCAAAGACCCAGATGGCAGAGAAATTAAGTTTTACAAG  
ATCATCGATTATTTGCTGGAGGGAAAAGAGGAAATTAAGTTCATCCCGTCTCCTCCTGCAGATCACTG  
GTCACTTGTGAGCGGCCTGCCAACATATGTTGCTGAAAATGGTTTTATCTGCAACATGATGAATGCTCC  
AGCAGATGAATACTTCACATTTCAAAAAGAAGCAGTGGATGAAACAGGTTGGGTTATAAAGAATGTCC  
TGTCTTTGCCAATTGTGAATAAGAAAGAAGAGATAGTGGGAATAGCTACATTTTACAACCGAAAGGAT  
GGCAAACCATTTGATGAATATGATGAGCAGATCACTGAAACCTTGACACAGTTCTGGGATGGTCACT  
CCTGAACACTGATACTTATGACAAGATGAATAAACTGGAGAGCAGGAAAGATATTGCTGCAGAAATG  
TTAATGTACCATTCAAAGTGCCTGACAAAGAAGTGCAGACCATTTTGAAAACAAAAGAGAAGCTGG  
ACAAGGGCACTGCAGACTGTGAACAAAAGAAATGATTACAATCTTGAAAGAAGAAGTGCCTGATCC  
GTGCAAAAATTGAACTCTATGAATTTCACTTCAGTGACTTACCTGTTTCAGAGTTTGATCTAATCAAGTA  
TGGAATTCAGTGTTTCTTTGAAATAAAGGCCGTTGAAAATTTCAAAAATACCAGCAGATGTATTGACCC  
GATGGATGTATACAATCAGGAAAGGTTATCGTGATATTACCTACCATAACTGGCGCCATGGATTTAAC  
GTAGGACAGACCATGTTTACACTTCTAATGACAGGCAAATAAAGAAATATTATTAGATCTAGAAGC  
CTTCGCCATGGTTACTGCAGCTTTCTGTGATGATATTGATCACCGTGGCACCAATAACTTGTACCAGAT  
GAAATCACAAGCACCTCTAGCAAGGCTGCATGGATCCTCTATTTTGAAAGACATCACCTTGAGTACA  
GTAACACTACTTCAGGATGAGAGTATAAACATTTTTCAAACCTAAACCAACGTCAGCATGAAACA  
GTCATGCATTTAATGGAAGTTGCTATAATTGCGACTGACTTGGCCTTGTATTTCAAGAAAAGGACAATG  
TTTTCAAAGATTGTAGACAACGTCGAACAAATGGAAAATGAGGAAGAAGCCATAAAGTTTATTTTCGTC  
TGACCAACCAAGAAAGAAATTGTCATGGCAATGATGATGACAGGATGTGACTTGTCTGCTATAACAA  
AGCCCTGGGAAGTACAAAGCAAGGTTGCACTGATGGTTGCCAATGAGTTCTGGGAGCAAGGTGATCTA  
GAAAGGACAGTTTTACAGCAGCAACCAATTCCCATGATGGACAGAAATAAAGAGATGAACTCCCTA  
AACTACAAGTTGGTTTCATCGACTTCGTGTGTACCTTTGTGTATAAAGAATTCTCAAGATTCCACAAAG  
AAATAAAACCCATGTATGATGGTCTTCAAACAACAGAGTTGAATGGAAATCGATGGCTGATGAGTAT  
GAAGCAAAAATGAAGCTGCTTGAAGAACAAAAGGAAAAAGAAGAAATGGCAGCCAAAACAGCAGCA  
AATGGTGGAGTAGGAGGCGATGGGAAAGGAAACGAGGAAAGCAAACGTGGAGGAAAATCCAGAACA  
TGCGAAATATTTTAA

>KT749710\_PDE6C-Partial\_Florida\_gar\_25537-2-1

ATGGGTGAACTTAACAAGAATCGGTGGAGAAGTACTTGGAGAACAACCCCCAGTTTGCCAAGGAGT  
ACTTTGATAAAAAGCTACGGGCAGAGGTAAGTGGGGCAGCTTTTTTCGGATACCAAAGTAAATGTGAAA  
GATGTGGCTTCAATCAAGGAAATTACCCAAATACATGAGGCAACTTTTATATTTGAACTGCTGAAAGC  
AATCCAGGATGTATCTAATGTGGAAAAGACCATGCACAATGTTCTGCAAAGAATAGCCCTTCTAGTGA  
AAGCAGACAAGTGTAGCTTGTATGAGCAGGTCCAGGAACGGTATTCTGAGCTATCCACAACACTC  
TCAATGTTACTGCAACATCTAGCTTTGAGGAAAATATTGTTTCTCCTGACTCAGAGATAGTTTTCCCCT  
TGGATGTGGGCATTGTTGGGTGGGTGGCTCACACAAAGAAGACATTCAATATAACCAGATGTTAAAAAG

AACACCCATTTTCAGTGATTTTTGTGGACAAGCAGACAGGATACACCCTAAAACATGCTGGCTTGTCC  
AGTAATGAATGGGAAGGAAGTGCTGGCAGTTGTCATGGCAATAAACAAAACACTGATGAACCAGAGTTC  
TCAAAGCAGATGAAGAGCTCTTTCTCAAGTACCTTAACTTTGCAACTGTCATTTTACAACAAAACCAG  
ATTTCTACATGTACAATGTGGAATCCAGAAGGAGTCAGGTGTTGCTGTGGTCAGCTAGCAAAGTATT  
TGAAGAGCTCACGGATATAGAACGCCAGTTTCACAAAGCTTTATACACTGTAAGAAATTATCTAACT  
GCGAAAGGTACTCTGTTGGACTCTTGGATATGACCAAAGAAAAGGAATTCTACGATGAGTGGCCAATC  
AACTAGGAGAAGCAGAGCCTTACAAAGGTCCAAAGACACCAGATGGAAGAGAAGTCAACTTCTATA  
AGATCATTGATTACATTTTGCACGGAACAGAAGAAATCAAAGTCATACCGACACCTCCTGCAGATCAC  
TGGTCCCTTCTTAGTGGTCTACCAACCTACGTAGCAGAAAATGGATTTATCTGTAATATGATGAATGCA  
GCAGCAGATGATTTCTTCACATTCCAGAAAGAGGCTTTTGTATGAGACAGGATGGAAAATTAATAATGT  
CCTGTCACTTCCAATTGTCAACAAAAAGGAAGAAATCGTGGGAGTTGCCACATTCTACAACAGAAAAG  
ATGGAAAACCCTTTGATGAATATGATGAACAGATAACTGAAGCCCTCACTCAGTTTTTGGGATGGTCT  
GTTTTAAACACAGACACCTATGATAAAATGAATAAACTGGAAAACAGAAAGGACATTGCACAAGAAA  
TGCTCATGTATCAAACCAAGTGTACAAAATCGGAGCTTCAGTCCATCCTGAACACACAGGAGAAATTC  
AATCAAGAGCCAGAAGACTGCGACTCAAAGGAACTTGTTAAGCTCTTGAATCAAACCTTCTGATCC  
CAAAGAAGTGGAGCTGCTGGAATTCCACTTCAGCGACTTCCCTGTGTCAGAGTTCGATCTGATCAGAT  
GCGGAATTCAGTGTTTCTTTGTACTAAATGTAGTGGAAAAGTTCAAAGTACCTGCCGAAGTACTTACCC  
GCTGGATGTACACTGTGAGGAAAGGTTATCGGGACATTACTTATCACAACCTGGAGACATGGCTTCAAT  
GTAGGCCAGACCATGTTCACTCTGTTACTGACGGGTAGACTGAAGAAATACTATTCAGATCTTGAGGC  
CTTTGCAATGGTAGCAGCTGCCTTTTGTATGATATCGACCACCGAGGGACCAACAATTTATACCAAAT  
GAAGTCTGCTTACCCTGGCAAGGCTGCATGGGTCTTCCATCTTGGAAAGGCACCACCTTGAGTACA  
GCAAGACACTACTGGAAGATGAGAGCCTCAACATTTTCCAGAACCTTCAGAAGCGTCAGTTCGATACT  
GTGATACATTTATTTGAAGTGGCCATCATTGCGACGGATCTGGCTCTGTACTTCAAAAAGAGGACCAT  
GTTCCAGAAAATAGTCGATGCCACGGAACAAATGGCAACTGAAGAAGAGCAAATCAATTATGTGTCA  
AACAAATCCCATCAGGAAGGAAATTGTGATGGCTATGATGATGACAGGCTGTGACTTATCTGCCATTAC  
CAAGCCATGGGAAGTACAGAGCAAGGTG

>KT749711\_PDE6C\_Bowfin\_25775-1-1

ATGGGTGAACTAAACAAAGAAGCGGTTGAGAAGTACTTGGAGAATAACCCCAAGTTGCCAAGGAGT  
ACTTTGATAAGAAGCTTCGAGCAGAGGTAAGTACTGGGGGCGAGCTTTTACGGATTCCAAATTGGATATCAAG  
GAAGCGGCTTCGATGAAGGAAATTACCCAAATATATGAATCGTCATTTATATTTGAAATGATCAAAGA  
ATTACAGAATCTAACGAGTGTGGAAAAGACTGTACACAAGGTCCTGCAGAGAATAGCAGCGCTGGTG  
AGAGCTGACAAGTGCAGCTTGTTCATGTGCAGGTCTAGAAACGGCATTCCCTGAGCTGTCCACTACCT  
CTTCAATGTCACGGAAAACCTCCAAGTTTGGAGAAAATATTGTGGCTCCTGACTCTGAGATTGTTTTCCC  
TTTGGATGTGGGCATAGTTGGGTGGGCGGCTCACACAAAGAAGACATTCAATATAACGGATGTTAGAA  
AGAATAACCATTTCACTGACTTTGTGGACAAGCAGACAGGATACACCACGAAAAGCATGCTGGCCAGT  
CCGATAATGAATGGAAAGGAACCAATGGCTGTCATAATGGCAATAAACAAAAAGACGCCCTGAAT  
TCTCAAAGCAGATGAAGAGCTTTCATCAAGTACCTTAACTTTGTGAACATAATTTACTACAAAATT  
ACACTGCATATCTTTACAATGTGGAATCCAGGAGAAGTCAAGTACTGCTGTGGTCTGCTAGCAAAGTG  
TTTGAAGAACTTACAGATATTGAGCGTCAGTTTCACAAAGCTTTATATACTGTGAGAATATATCTTAAC  
TGTGAAAGATACTCGGTTGGTCTGCTGGACATGACCAAAGAAAAGGAATTCTACGATGAATGGCCAGT  
CAAACCTGGAGATGCCGAACCATAACAAGGGTCCAAAGACACCAGATGGAAGAGAAGTTGTCTTCTAT  
AAGCTCATTGATTATATTTTGCATGGCACTGAAGAAATCAAAGTCATACCGGCACCCACCCAGATCA  
CTGGTGCCTTGTTAGTGGATTACCAACTTATGTGGCTGAAAATGGATTTATTTGTAACATGATGAATGC  
ACCAGCAGACGACTACTTACATTCCAGAAAGAGGCTTTTGTATGAGACGGGCTGGAAGGTTAAAAATG  
TCTTGTCACTGCCTATTGTCAACAAAAAGGAAGAGATTGTGGGAGTTGCCACATTTTATAACAGAAA  
GATGGAAAGCCATTTGACGAGTATGATGAGCAGATTACTGAAGCCCTCACACAGTTTTTGGGTTGGTC  
TGTACTGAACACGGACACCTACGACAAAATGAACAAGTTGGAAAACAGAAAGGACATTGCACAGGAA  
ATGCTCATGTACCAAAGCAAATGTACTAATAATGAGCTGCAGTCAATTCTGAACACCAAAGAGAAATT  
CAAAAAAGAGCCAGAAGATTGTGATGCAAAGGAACTGGTCAAGCTGTTGAAATCTAACCTTCTGATC  
CCAAAGATGTTGAGCTGCTTGAATTCCACTTCAGTACTTCCCTGTTTCAGAGTTTGATCTCATTAAAT  
GTGGAATTCAATGTTTCTTTGTACTAAATGTGGTGGACAAGTTCAAAGTACCTGCAGAGGTTCTAACCC  
GATGGATGTACACAGTGAAGAAAGGTTATCGAGACATTACCTATCACAATTGGCGGCATGGTTTCAAC  
GTGGGCCAGACCATGTTCACTCTGCTGATGACGGGTAGGATAAAGAAATACTACTCAGATCTTGAAGC  
CTTTGCAATGGTAGCAGCTGCCTTTTGTATGATATTGACCACAGAGGAACCAACAACCTTGTATCAGAT  
GAAGTCTGCATCGCCATTGGCAAACTGCATGGGTCTTCTATCTTAGAAAGGCATCACCTGGAATACA  
GCAAGACCCTACTTGCAGATGAGAGCCTCAATATCTTCCAGAACCTTCAAAGCGCCAGTTTGAACCT

GTTATCCATTTATTTGAAGTCGCCATCATTGCAACAGACTTGGCTTTGTACTTCAAAAAAAGAACAATG  
TTTCAAAAAAATTGTTGATGCCACTGAGAAAATGGAAAAGGAAGAGGATCAAATCAATCATATCTCCAA  
TAATCCAACCCGGAAGGAAATCGTCATGGCAATGATGATGACTGGATGTGATTTATCTGCCATTACCA  
AGCCCTGGGAAGTCCAGAGTAAGGTGGCCCTAATGGTAGCCAATGAATTTTGGGAACAGGGAGATTTG  
GAAAGGACCGTTCTCGAGCAGCAACCCATTCCTATGATGGACAGAAACAAGGCTGAAGAATTGCCTA  
AGCTGCAAGTTGGCTTTATCGATTTTGTATGTACTTTTGTATAACAAGGAATTTGCGAGGTTCCACAAAG  
AAATCACACCCATGTTTCGATGGCCTGCAAAAACAACCGAGTGCATTGGAAGGCCCTGGCAGATGTGCAC  
GAAGAGAAGGTGAAGGCCATCGAAGAGGAGAAGAAGAAGCAGGAAGAGGCAGCCAAAAAAGACGG  
CGATGGGGCTGAAAGTGGCAAGTCCAAAACCTGCACTATATTTTAG

>KT749712\_PDE6X\_E.\_cirrhatus\_89665-1-1

ATGGGTTCAATAAGCAAAGAAGATGTGGAAAGCTTCCTCGATAACAACCCAGCATTTCGTCAAGGATTA  
TTTTGAGAAGAAAATGCGTCCCAATGTCATTGCAGAAATATTCAGCAAAGAAATGGAAAAGGAGGTG  
ACTGGTTCATTCAATTATCCAAGGTAGAGGAAAGCGAGATTCTCTTTCGAACTTGTGCAAAAATATG  
TCCGAGACATTAACATGGAGAAATGTGTGCACAAATGCTTGCACGCTTGGCCAGCTCATCGACGC  
CGATCGCTGCAGTCTGTTTCATGTACAGACAAAGAAACGGTACTCCAGAGGTGGCGACTCGCCTCTTCA  
ATGTGACTCGCACCTCATCCCTCGAAGAGTGCCTCGTTCCACCAGACTCCGAGATCGTTTTTTTCACTCG  
ATCTTGGCATCGTGGGCCATGTGGCGCTTACGAAGAAGATGGTGAACGTCTGTGACGTGCAGGAGAGC  
CCCTTGTTTTGCGATTTTACTGACAAGCTCACTGATTACACGACCAAAAACATTCTGGCGACTCCCATC  
ATGAATGGCAACGACGTGGTGGCCATCATTATGGCCATCAACAAAGTGAGCGACACGTGTTTCAGCAA  
GCTTGACGAGGAGGTGTTTCTTAAATACCTGATATTTGTGTGCGTTTGTTTGAAAACCCATCATCTCTC  
ATACATGCATTCTGTGAGACCCGTCGAGGCCAGGTGTTGCTGTGGGCTGCCAGTAAGGTGTTTGAGG  
AACTCACTGACATCGAGCGGCTATTCCACAAGGCCATGTACACTGTACGCGGCTATCTTAACTGTGAG  
CGTACTCTGTGGGATTGCTCGACATGACGAAACAAAAGGAGTTTTTTCGACGAGTGGCCCATTAAT  
GGGAGAGGTTCGCCATATAAAGGTCCAAAGACTCCGGATGGAAGGGAAATACGATTTTACAAAGTG  
ATTGACTACATTCTCATTGGAAAGGAGGAAATCAAAGTCATTCCAAATCCTCCAGATGATCACTGGGC  
ATTGAGCAGCGCCTGCCTGTCTACGTAGCAGAGAGCGGTTTTATTTGCAACATTATGAATGCTCCTAC  
AGACTGCACCTTCAAGTTCAATAACGAGCCTGTGGATGAAACTGGATTTGTGACGCACAATGTTCTTTC  
ACTGCCAATCGTAAATAAGAAAGAAGAGATCGTGGGTGTGGTCACTTTCTACAACCGCAAGGACAAC  
AAACCGTTTGATGAATTCGACGAGATGATTATGGAGGCTTTGACACAGTTCCTTGGCTGGTCTGTCCTG  
AACACAGACACCTATGACAAAATGAATAAGATTGAAAATCGAAAGGACATTTACCTTGAGATGTTGA  
ACTACCATAACAAGTGCACCTATGGCGAACTTCAGACGATTCTGAAAACAGAAGAGGTTTTGCAAAAG  
GATCTCTCCAGCTGCGAGGAAAATGAAATGAAGAAATTGTTGAAGGCAGAACTGCCAGACCCCAAAC  
AGATGGAGCTTTACCAGTTCACCTTCAGTGACCTGGAGATCGAAGAGCTAGATTTGGTCAAAGGAGGC  
ATTTGCTTATTTCAAGAACTGGGTGTCCTGGAAAAGTTCAAAGTTCCTCGGGATGTGATCGTACGCTGG  
ATGATAACGGTGAACAAAGGCTACCGCAATATCACATAACCAACTGGCGGCATGGCTTCAATGTTGG  
CCAAACAATGTTACATTAACAACCGGGAGGCTGAAGAAGTACTACTCAGATCTCGAGGCTTTTG  
CCATGCTTGCTGCTGCATTCTGCCATGATATGGACCACAGGGGTGCAAAACAACCTTTATCAAATGAAG  
TCTCAATCTCCATTGGCAAAGCTGCATGGCACCTCCATCCTTGAAGACACCACCTTGACTACAGCAA  
GACCTTGCTCACTGATGAGAGTATCAACATTTTTTCAAACCTCAACCGACGTCAATACGATAACGTAA  
TTCATCTCATGGAGATTGCCATCATTGCAACGGACTTGGCGCTGTATTTCAAGAAGCGAACTATGTTTC  
AGAAGATCGTCGAGCAGTGTGAGCAGTTGGAGACCGAGGCAGATGCGGTGAAATACATTACATCTGA  
TCCCACGAAGAAAGAGATTATCATGGCTATGATGATGACAGCATGTGACCTGTCTGCTATCACCAAGC  
CATGGGAAGTGCAAAGCCAGGTGGCCCTTTTGGTGGCTGCTGAGTTCCTGGGAACAAGGTGATCTTGAG  
CGCACTGTTTTGACGAGCAACCCATTCATGATGGACAGAAACAAGGCTGATGAGTTACCCAAGCT  
GCAGGTGCGCTTTATTGACTTCGTCTGCACATTCGTGTACAAGGAGTTCCTCAAGGTTCCACAATGAGAT  
TACGCCCATGTTTGATGGCCTGAAGAACAACCGAGTACACTGGAAAGCCCTTGCTGATGAGTACGAAG  
CTAAATGCAAGGCACTTGAGACCCAGAATGCATCTCCACCCTTACCCAATCAAACCTCAAGATATGTCA  
GCTGCAAACGGAGCTGGTGAACACCCGGTAAAGTCGTTGAGGCACCAAAATCTAAGACATGCCTGAT  
CATGTGA

>KT749713\_PDE6X\_G.\_australis\_45841-312-1

ATGGGCAGCCAGGACCAGGAGAGCGTGGAGCGGTTCTGGACTCCAACCCGGCCTTCGCGAAGGAAT  
ACTTCAACCGGAAGCTGCGGCCCGAGTTGATTTTCGACCATGTGCGACAACAGACGGGCGGCGGCGGT  
GGCGGCGGGCCGGCCACCTGCTCCTACGTGGACATCTCCAAGGTGGAGGAGAGCGAGGTGCTGTTTCA  
CCTTGTGCGCAACATGTCCGAGACGATCAACATGGAGAAGTGCCTGCACAAGTGCCTGCGCCACCTGG  
CGGGCCTGATAGACGCGGACCGCTGCAGCCTCTTCATGTACCGCCAGCGCAACGGCACGCCCCGAGGTG

GCCACGAGGCTCTTCGACGTGACGAGGACGTCGGCGCTGGAGGACTGCCTGGTGCAGCCCAGGCGG  
AGATCGTCTTCCCGCTCGACCTGGGCGTCTGTGGGCCACGTGGCGCAGTTCAAGAAGACGGTCAACCAC  
AACGTCAGCGAGGGAAAGCTGTTCTGTAACCTTCGTGGACAAGCTGACGGGCTACACGAGCAGGAACA  
TCCTGGCGACGCCATCATGAACGGCAAGGACGTGGTGGCCGTCATCATGGCCGTCAACAAGGTGACC  
GGCCCCGCCTTCACACAGCTCGACACAGAGGTCTTCATGAAATACCTCATCTTCGCTCCCTCTGCTTG  
AAAACCTACTACCTGTCTGACATGCACGCCTGCGAGACGCGGAGAGGGCAGGTCCTGCTGTGGGCGGC  
GAGCAAAGTGTTTCGAGGAGCTGACGGACATCGAGCGGCAGTTCCACAAGGCCATGTACACCGTGC  
GGATACTCAACTGCGAGCGCTACTCCGTCGGGCTCCTGGACATGACCAAGCAGAAGGAATTCTTCGA  
CGAGTGGGCCATCCAAATGGGCGAGGTGCCACCCTACAAAGGCCCCAGAACTCCCGACGGAAGGGAA  
ATTCACTTCTACAAGATCATCGACTACATCCTCATCGGCAAGGAGGAGATCAAAGTGATCCCAACCCC  
ACCGGATGACCACTGGGCCTTGGTCAGTGGCCTCCCTGTGTACGTGGCGGAGACGGGCTTCATTTGCA  
ACATTATGAACGCGCCTTCCGACGAAATGTTCAAGTTTTCTCTGAACCCGGTGGACGAGACGGGCTTC  
GTGATGCGCAACGTGCTGTCTGCTGCCATCGTCAACAAGAAGGAGGACATCGTGGGCGTCCGACCTT  
CTACAACCGCAAGGACGGGAAGCCCTTCGACGAGTTCGACGAGATGATCATGGAGGCGCTGACACAG  
TTCCTGGGCTGGTTCGGTGTCAACACGGACACCTACGACAAGATGAACAAGATCGAGTTCGCAAGGA  
CATCGCCCTGGAGATGCTCTTCTACCACAACAAGTGCACCACCACGGAGCTGCACACCGTCATCAAAA  
ACAAAGAGATCTTGGACAAGGATCTTGAGAACTGCTCAGAAGCTGAACTCAAAAAGTTGGTTAAACA  
AGAGCTGCCCCGACGCCAAGGAGATG  
GAACTTTACGAGTTCCACTTCAGCGACCTGGAGGAGACCGAGTTCAACCTGGTCAAGGGAGGAATGAG  
GATTTTCTTCGAGCTGGGGGTCTGTCGACAAATTCAAGGTCCCTCCGGAGACGCTGGTGCCTGGATGA  
TCACGGTGAGCAAGGGCTACCGCACCATCACCTACCACAACCTGGCGCCACGGCTTCAACGTGGGCCAG  
ACCATGTTCTCGCTGCTCATGACGGGGAAGCTGAAGAAGTACTTCACGGACCTGGACGCGTTCGCGAT  
GGTGGCCGCGGCGTTCTGCCACGACATCGACCACCGCGGAACCAACAACCTTACCAGATGAAGTCTG  
CGGCTCCGCTCGCCCGGCTCCACGGCACGTCCATCATGGAGCGACACCACCTGGACTACTCCAAAACG  
CTGCTCACCGACGAGTCGCTGAACATCTTCCAGAACCTGAACCGGCGTACGTACGAGACGGTGTGCA  
CCTGATGGAGGTGGCCATCATCGCCACCGACCTGGCGCTCTACTTCAAGAAGCGAGCGATGTTCTGTA  
AGATCGTGGACCACTGCGAGACGCTGGCAAGCGAGGCGGAGGCCATCAAGTACATCACGTGCGACCC  
C  
ACCAAGAAGGAGATCATCATGGCGATGATGATGACGGCCTGCGACCTGTTCGGCCATCACCAAGCCATG  
GGAGGTGCAGAGCAAGGTGGCGCTGCTGGTGGCCGCGAGTTCTGGGAGCAGGGGCGACCTGGAGCGC  
TCCGTGCTGCAGCAGAACCCATCCCCATGATGGACAGGAACAAGGCGGCGGACCTTCCAAGCTGCA  
GTGCGGCTTCATCGACTTCGTGTGCACCTTCGTGTACAAGGAGTTCTCGAGGTTCCACCCGGAGATCAC  
GCCATGTACGCCGGCCTGCAGAACAACCGCGTGCCTGGAAGGCGCAGGCCGACCAGTACGACGCC  
AAGTGCAAGCTGCTGGAGGAGGCCAAGCAGAAGCGGACGGACCGCTCAAAGCCGACACCGCGGTGA  
CCAACGGCGGCTGCGAGGAGCCTCCCAAGTCCAAGAGCTGCGTCATCGTGTGA

>KT749714\_GEOAU\_c45841\_g3\_i1

ATGGGCAGCCAGGACCAGGAGAGCGTGGAGCGGTTCTGGACTCCAACCCGGCCTTCGCGAAGGAAT  
ACTTCAACCGGAAGCTGCGGCCCGAGTTGATTTTCGACCATGTGCGACAACCAGACGGGCGGCGGCGGT  
GGCGGCGGGCCGACCCTGCTCCTACGTGGACATCTCCAAGGTGGAGGAGAGCGAGGTGCTGTTTCGA  
CCTTGTGCGCAACATGTCCGAGACGATCAACATGGAGAAGTGCGTGCACAAGTGCCTGCGCCACCTGG  
CGGGCCTGATAGACGCGGACCGCTGCAGCCTCTTCATGTACCGCCAGCGCAACGGCACGCCCAGGTTG  
GCCACGAGGCTCTTCGACGTGACGAGGACGTCGGCGCTGGAGGACTGCCTGGTGCAGCCCAGGCGG  
AGATCGTCTTCCCGCTCGACCTGGGCGTCTGTGGGCCACGTGGCGCAGTTCAAGAAGACGGTCAACCAC  
AACGTCAGCGAGGGAAAGCTGTTCTGTAACCTTCGTGGACAAGCTGACGGGCTACACGAGCAGGAACA  
TCCTGGCGACGCCATCATGAACGGCAAGGACGTGGTGGCCGTCATCATGGCCGTCAACAAGGTGACC  
GGCCCCGCCTTCACACAGCTCGACACAGAGGTCTTCATGAAATACCTCATCTTCGCTCCCTCTGCTTG  
AAAACCTACTACCTGTCTGACATGCACGCCTGCGAGACGCGGAGAGGGCAGGTCCTGCTGTGGGCGGC  
GAGCAAAGTGTTTCGAGGAGCTGACGGACATCGAGCGGCAGTTCCACAAGGCCATGTACACCGTGC  
GGATACTCAACTGCGAGCGCTACTCCGTCGGGCTCCTGGACATGACCAAGCAGAAGGAATTCTTCGA  
CGAGTGGGCCATCCAAATGGGCGAGGTGCCACCCTACAAAGGCCCCAGAACTCCCGACGGAAGGGAA  
ATTCACTTCTACAAGATCATCGACTACATCCTCATCGGCAAGGAGGAGATCAAAGTGATCCCAACCCC  
ACCGGATGACCACTGGGCCTTGGTCAGTGGCCTCCCTGTGTACGTGGCGGAGACGGGCTTCATTTGCA  
ACATTATGAACGCGCCTTCCGACGAAATGTTCAAGTTTTCTCTGAACCCGGTGGACGAGACGGGCTTC  
GTGATGCGCAACGTGCTGTCTGCTGCCATCGTCAACAAGAAGGAGGACATCGTGGGCGTCCGACCTT  
CTACAACCGCAAGGACGGGAAGCCCTTCGACGAGTTCGACGAGATGATCATGGAGGCGCTGACACAG  
TTCCTGGGCTGGTTCGGTGTCAACACGGACACCTACGACAAGATGAACAAGATCGAGTTCGCAAGGA

CATCGCCCTGGAGATGCTCTTCTACCACAACAAGTGCACCACCACGGAGCTGCACACCGTCATCAAAA  
ACAAAGAGATCTTGGACAAGGATCTTGAGAACTGCTCAGAAGCTGAACTCAAAAAGTTGGTTAAACA  
AGAGCTGCCCCGACGCCAAGGAGATGGAACCTTACGAGTTCAC

>KT749715\_GEOAU\_c45841\_g1\_i1

GAACTTTACGAGTTCACCTTCAGCGACCTGGAGGAGACCGAGTTCAACCTGGTCAAGGGAGGAATGAG  
GATTTTCTTCGAGCTGGGGGTCGTCGACAAATTCAAGGTCCCTCCGGAGACGCTGGTGCCTGGATGA  
TCACGGTGAGCAAGGGCTACCGCACCATCACCTACCACAACCTGGCGCCACGGCTTCAACGTGGGCCAG  
ACCATGTTCTCGCTGCTCATGACGGGGAAGCTGAAGAAGTACTTCACGGACCTGGACGCGTTCGCGAT  
GGTGGCCGCGGGCTTCTGCCACGACATCGACCACCGCGGAACCAACAACCTCTACCAGATGAAGTCTG  
CGGCTCCGCTCGCCCGGCTCCACGGCACGTCCATCATGGAGCGACACCACCTGGACTACTCCAAAACG  
CTGCTCACCGACGAGTCGCTGAACATCTTCCAGAACCTGAACCGGCGTCAGTACGAGACGGTGTGCA  
CCTGATGGAGGTGGCCATCATCGCCACCGACCTGGCGCTCTACTTCAAGAAGCGAGCGATGTTTCGTGA  
AGATCGTGGACACTGCGAGACGCTGGCAAGCGAGGCGGAGGCCATCAAGTACATCACGTGCGACCC  
CACCAAGAAGGAGATC

>KT749716\_GEOAU\_c45841\_g2\_i1

ACCAAGAAGGAGATCATCATGGCGATGATGATGACGGCCTGCGACCTGTTCGGCCATCACCAAGCCATG  
GGAGGTGCAGAGCAAGGTGGCGCTGCTGGTGGCCGCGAGTTCTGGGAGCAGGGCGACCTGGAGCGC  
TCCGTGCTGCAGCAGAACCCCATCCCCATGATGGACAGGAACAAGGCGGCGGACCTTCCAAGCTGCA  
GTGCGGCTTCATCGACTTCGTGTGCACCTTCGTGTACAAGGAGTTCTCGAGGTTCCACCCGGAGATCAC  
GCCCATGTACGCCGGCCTGCAGAACAACCGCGTGCCTGGAAGGCGCAGGCCGACAGTACGACGCC  
AAGTGCAAGCTGCTGGAGGAGGCCAAGCAGAAGCGGACGGACGCCGTCAAAGCCGACACCGCGGTGA  
CCAACGGCGGCTGCGAGGAGCCTCCCAAGTCCAAGAGCTGCGTCATCGTGTGA

>KT749717\_CNGA1\_Bluespot\_ray\_37236-8-1

ATGACAGCTGAGATTAATACACATCGGACGTACCTATATGCTTCCAGGGTGTTCAGTTCACCCTGCTGAT  
GACGAGGTTGAAAAGATGGAGAATGGACAAAACAGGAACCAAGCCATTGCTTCTGATTTGGAGATGT  
CCAACATAAACAACCTGTAACAACAATGATGAAGAAAAAGGAAAGAAAGAATCCAAAAAGAATAAGA  
AAGAAAATAAAGGTAAATCTGATGGTAAAAAAGAGAAGAAAAGGGACAAAAGAAAAGAAAAGGACA  
AAGAGAAGAACAACAAGAGGGAAGAAAAGGGGAAGGAAGAGAAGAAAGATGACAAGAAAGAT  
GACAAGAAAGATGACAAGAAAGATGACAAGAAAGGCAAGATTGAATTGGCAAAACTGATACCCATTC  
TGGACCCGGCAGGAAACATGTATTACTACTGGCTCATGATAATTACAATGCCAGTAATGTACAACCTGG  
ACCATGCTCATAGCAAGAGCATGTTTTGAAGAACTTCAAGCAGATTACTTGTTCACATGGTTCATCCTT  
GACTACGTGTCAGATATCCTTTACATAATTGACATGTATTCAGGACAAAACAGGTTACTTGGAAACA  
AGGACTATTAGTCCAAGATGAAAAGAAACTCAGAGAAAATATTTTGCTACACTGCAGTTCAAACTAG  
ATGTTTTCTACTAATTCCAACCTGACTTACTGTTTTTCATCTTGGGGCTAAAATATCCCGAAATCAGATT  
AAATCGTTTGGAGCAGGATTAATCGAATGTTTGGAGTTTGTGTCAAGAACTGAAACGAGGACAAACTACC  
CAAACATTTTTAGGATATCCAATCTTGTTCATGTACATTGTAATTATTATCCATTGGAATGCTTGCATATA  
CTATTCAATTTCAAAGCTATAGGATTTGGAGCGGACACATGGGTATAACCAAAATATCTCTATTCTGTA  
ATTTTCTCGGCTTGCTAGGAAGTATGTATAACAGTCTCTATTGGTCAACACTGACACTAACAACCATTGG  
AGAAACCCCTCCTCCTGTTTCAGGATTCAGAATACTTCTTCGTGGTGGCCGATTTCTTGGTTGGAGTGTT  
GATTTTTGCTACCATCGTTCGGTAACGTTGGTTCATGATTTCCAACATGAATGCAGCTCGTGCAGAGTT  
TCAGTCAAGGATTGATGCCATCAAACAGTACATGCCTTCCGAAAAGTGAGCAAGGATTTGGAGAAG  
AGAGTCATCAAATGGTTTGGACTACTTGTGGACAAAACAAAAGCTGTAGATGAAAGAGAGGTTCTTAA  
AGTACCTTCTGATAAGCTAAGAGCAGAGATTGCCATCAATGTCCATTTGGATACACTGAAGAAAGTT  
CGCATCTTTCAGATTGTGAAGCTGGTCTGCTGATTGAATTGGTATTGAAGCTGAGGCCACAAGTGTAT  
AGCCCTGAAGATTATATATGTCGCAAAGGAGACATCGGTAGGGAGATGTACATCATCAAAGAAGGGA  
AGCTGGCAGTTGTTGCTGATGATGGAATTACTCAATTTGTGGTTCTGAGTGACGGCAGCTACTTTGGTG  
AAATTAGTATCCTAAATATCAAAGGCAGCAAAGCTGGAAATAGAAGAACAGCAAACATTAAGAGTAT  
AGGCTACTCAGATTTGTTCTGTCTCTCAAAGATGATCTCATGGAAGCCCTGACAGAATACCCAGATG  
CAAAGCAATGCTGGAGGAAAAGGGGAGACAAATTCTAATGAAGGATGGTCTTTTGGATCTGGATGTT  
GCTCAGCTTGGAGCTGACCCAAAGGATATGGAGGAGAAAATAACCAGACTGGACACTGCAATTGATA  
ACCTACAGACTAAATTTGCTAGACTTCTGGCAGAATAAATGCTACACAACAGAAGCTGAAAGAAAG  
AGTGACAAAGATTGAGAACAATAAACAATCAGGAATGCAGTTTGATTATTCAGGACTGATAGATG  
TTGAAGCAAAGGATAAAGCTGAAGAGAGTTAA

>KT749718\_CNGA1\_Bamboo\_shark\_73640-1-1

ATGGCGACTGTGATTAATACACACCAGAGCTATCTTCGCATTCCCCGAGTGTCTGTTCATCCTGCAGAT  
GATGAGGTGGAACAGATGGAGAATGGACAAAGCAGGACCCAGACCCTTGTTGATGACAGGGAGATGT  
CCAACATTAACAACAGCAACAACAATGATGAAGAGAAAGAGACAAAGAAGGAATCCAAAAAGAGCA  
AAAAAGAGAAAAAGGGCAAATCTGGTGGCAAAAAAGAAAAAGAAAAAGGATAAGGAAAAAGAAAAA  
GATAAAGATAATAAAGGAAAAGGATGAAGAAAAAGATAAAGATGAGAAGAAGGATGAGAAGAAA  
GATGATGAGACCGATAAAAAGCAAGATATCAAGAAAATGCTGATGAATATGATTCCTACGCTTCCCAT  
TCTTGATCCAGCAGGAAACATGTACTACAACCTGGCTCATGATTATTACAATGCCTGTGATGTATAACTG  
GACAATGATCATCGCTAGAGCATGTTTTGAAGAACTTCAGTCTGACTACTTGAGCACATGGTTCATCCT  
TGATTATGTATCAGATGTTATTTACATACTCGACATGTACTTAAGAACAACAAACAGGGGTATCTGGAAC  
AAGGTCTATTGGTCAGTGTGAAAGAACTCAGAGAAAAATACTTTGCCACAATCCAATTCAAATTA  
GATGTCATCTCACTTGTACCAACTGACTTTCTGTATTTTTTTATTTGGACTGGAATATCCAGAAATTAGAT  
TAAATCGTTTGACTAGGATTAGTCGATTGTTTGAATTCTTTTTCAAGAACTGAAACTCGGACAAACTATC  
CAAACATTTTCAGGATTTCCAACCTTGTCTATGTACATTGTGATTATTATTCATTGGAATGCTTGTGTGTA  
TTTTTCAATTTCCAAAGCTATAGGGTTTGGGGCAGATACATGGGTATATCCAAATGTATCCATTCCAGA  
GTTTTCCCGGCTTGCTCGGAAGTATGTGTACAGTCTCTATTGGTCAACACTGACACTAACTACCATTGG  
TGAAACACCTCCTCCTGTAGAGGATTCAGAATACTTTTTTGTAGTGGCTGATTTCTGGTTGGAGTGTCT  
GATTTTTGCCACCATTGTTGGTAATGTTGGTTCTATGATTTCCAACATGAATGCAGCTCGTGCAGAGTT  
TCAGTCAAGGATTGACGCCATCAAGCAGTACATGCACTTTCGAAAAGTGAGCAAAGATTTGGAAAAG  
AGAGTTATCAAATGGTTTGACTACTTGTGGACAAACAAAAAGCTGTAGATGAAAGAGAGGTCTTGAA  
GTATCTTCTGACAAGTTAAGAGCAGAAATTGCCATCAATGTCCACCTTGATACACTGAAGAAAGTTC  
GAATCTTTGCAGATTGTGAAGCTGGTCTGCTGATTGAGTTGGTGTGTAAGCTAAGACCCAGGTGTAC  
AGCCAGGGGATTATATCTGTCGCAAAGGAGACATTGGTAGAGAGATGTACATCATCAAAGAAGGAA  
AACTTGCTGTTGTTGCTGATGATGGAATTACTCAGTTTGTGGTTCTAAGTGATGGCAGCTATTTTGGTG  
AAATTAGTATTCTGAATATCAAAGGTAGTAAAGCTGGGAATAGAAGAACAGCAAACATTAAGAGTAT  
AGGCTACTCAGATTTGTTCTGCCTCTCCAAAGATGATCTAATGGAAGCACTCACAGAATATCCTGATGC  
AAAAGCAATGCTGGAAGAAAAGGGAAAGCAAATTCTAATGAAGGATGGACTTTTGGATTTAGATATT  
GCCAGCTTGGAGCTGACCCAAAGGACATGGAAGAGAAAGTAACAAGACTTGATATGGCAATTGATC  
TTTTACAGACTAAATTTGCTCGACTTCTGGCAGAATACAACCTCTACACAACAAAACTAAAAGAAAGA  
GTAACAAGATTGAGAATAAAATTAACAATCAGGGATGCAATTTGAATATTCAGAACTGGTAGATGC  
TGAAGCACCAACTGAACTGAAGAAAGTAAAAAGTAG

>KT749719\_CNGA1\_Florida\_gar\_59469-1-1

ATGGCGTCTGTAATTGACACTCATCGCACCCATATAGTGCCCCACGGATAGTTCTGCAGGATATGGAT  
GAAGATGTGGAGAGGATGGAGAGTGGAGAGTCAAAGGACGAATCTCCATCTGGTCCACAGGCACTCT  
TTAATGTCAACAACAGCAACAACAATGAAGAGGAGGACAAGAAGAAAAAGAAAAAGAGAAAAAGG  
AGAAAAAGCCAAAAAGAAAAGAAAGGAAAAGAAAAGAAAAGAAAGGACAAAGAAAAGGCGAAA  
GAAGAGAAAGAAAAGCAGAAAAGGAAAAGAGAAGGAGAAAGACAAGGAAAAGGAGAAAAGGA  
ACAACCAAAGAAGGAACTTTATATCATTGACCCAGCGGAAACATGTACTACAACCTGGCTGTTTGTCA  
TCACGATGCCTGTTATGTATAACTGGACCATGATCATTGCAAGAGCCTGTTTTGAAGAGCTCCAACATG  
ACTACCTGATCACGTGGTTCATTGTAGACTATGTGTCAGACTTGATATACCTAGCCGACATGTTATTCA  
GGACACGGACAGGCTACCTGGAGCAAGGATTGCTGGTGAGGGATGAAAAGAACTGAGGGAACGATA  
CATGGACACTACTCAGTTTAAAATAGACCTGCTGTCTATGATACCAACCGATGTCATGTACTTCAAAT  
GGGACTCAACTACCCTGAGATCCGACTCAATAAGTTGTTCCGAGTGGGCCGAATGTTTGAATTTCTTCA  
GAGAACAGAAACAAGGACCAACTATCCCAACATTTTTCGAATCTCCAACCTTGTCATGTACATCGTAA  
TCATCATTCACTGGAATGCTTGCCTTTACTTCTCCTTCTCTAAAGCGATTGGTTTTGGGGCAGACACATG  
GGTCTACCCTAATGTTTCCGATCCAGAGTTTGGACGACTTGTGAGGAAATATGCGTACAGCCTTTACTG  
GTCTACACTAACACTGACCACCATTGGTGAGACCCCTCCTCCAGTCCAAGACTCTGAATACTTCTTTGT  
TGTCATCGATTTCTGGTTGGCGTGTGATTTTCGCTACCATTGTCGGTAACGTCGGCTCAATGATCTCC  
AATATGAATGCTGCCAGGGCAGATTTCCAGGCAAGGATTGATGCTATTAAACAGTACATGCACTTTCG  
CAAAGTCAGCAAGGATCTGGAAAAGAGAGTTATAAAGTGGTTTACTACTTGTGGACCAACAAGAAA  
GCTGTGGATGAAAGAGAAGTCCTGAAGTATCTCCAGACAACTGCGAGCTGAGATCGCTATCAACGT  
CCACCTGGACACTCTGAAAAGGTACGGATCTTTGCTGACTGTGAGGCAGGACTTTTGATTGAACTGG  
TCTTGAAGCTGCGACCTCAAGTCTACAGCCCAGGCGACTATATATGCCGAAAGGGGGATATTGGCCGG  
GAAATGTACATCATCAAGGAAGGCAAGCTGGCTGTCGTTGCTGATGATGGGATCACGCAGTTTGTGGT  
TTTGAGCGATGGCAGCTACTTTGGGGAAATAAGTATCCTGAACATTAAGGCAAGTAAAGCTGGGAACC  
GTAGAAGTCCAATATTCGCAGTATTGGATATTCGGATTTGTTCTGCCTTTCCAAGGATGACCTGATGG

AAGCCCTCACTGAGTACCCAGATGCAAAGGCCATGCTTGAAGAGAAAGGAAGACAAATCCTCATGAA  
GGACGGGCTCCTCGATCTGGACATAGCCAAGCTAGGACCTGACCCGAAGGACATGGAGGAGAAAGTT  
AACAAAATGTATGGAAATTTGGAGACCCTGCAGACTAAGTTTGGCAGACTATTAGCCGAGTATGAGGC  
AGCTCAGCAGAAGCTGAAGCAGCGGGTGAAGTTCGAAAACAAGCTGATGTCTTCTGGGCAGGTT  
GTGATGTCTGAACTGGTGGATCCAGAGGCTGGAGCTGAACCTGCTGAAGCAAAGGAGAAAGATTAG

>KT749720\_CNGA1\_Bowfin\_23715-1-2

ATGACCGCAGTGATTAACACCCATCACACCTATTTGGTGCCACCTAGGATAGTCCTACAGGACATGGA  
TGAAGACCTGGAAAGGATGGAAATTGGGGAATCCACGGATCAATGTCCACCTGGTGCCGGAGCAGCC  
TTCAATGTCAACAAAAACAATAACAACGAGGAAGAGGAGAAGAAGAAAAAGAAAAAGGAGAAAAAA  
GAAAAAAAGGACAAAAAAGAAAAGAAGGAAAAGAAAAGAAAAAAGAAAAGATAAAGAAAATGCCAA  
AAAGAACAAAGAGAAAGGAACTGAGAAGGAGAAGGAGAAGGAGAAAGAGAAGGAGAAAGAGAAGA  
AGGAGGAGCCCCAAAGGATATTTTATCATTGACCCTGCTGGAAACATGTACTACAACCTGGCTGTTT  
GTCATTACTATGCCTGTTATGTACAACCTGGACCATGATCATAGCCCGAGCCTGTTTTGAAGAACTGCAA  
CATGACTACCTGGTCTCCTGGTTCATTTTAGACTATGTATCGGACATCATATACCTCGGTGACATGCTG  
TTCAGGACCCGGACAGGCTACCTGGAACAAGGACTTCTGGTGAAGGACGAGAAAAGACTGCGTGAGC  
GATACCTTCAAAGTCCGCAATTTAAATTAGATCTAGTGTCCATGATTCCAACCTGATGTCCTGTACTTCA  
GCTTTGGATTGAACTTCCCTGAGATCCGTCTCAATAAGCTGTTTCGAGTGGGCCGATGTTTCGAGTTCT  
TTCAGAGAACAGAAACCAGGACCAACTATCCCAACATTTTCCGCATCTCCAATCTGGTCATGTACATC  
GTGATTATCATTCACTGGAACGCGTGCCTCTACTTCTCCTTCTCGAAGGCTATCGGATTCGGGGCAGAC  
ACGTGGGTCTACCCGGATGTTACAGATCCAGAGTTCGGTCGACTTCTCCGGAAGTATGCATACAGCCT  
CTACTGGTCCACACTTACACTGACCACCATCGGAGAGACACCCGCCCTGTGCAGGACTCTGAATATTT  
ATTTGTTGTCGTCGACTTCTTGGTGGGCGTATTGATTTTTGCCACGATCGTTGGTAACGTGGGCTCCATG  
ATCTCAAATATGAATGCTGCCAGGGCCGATTTCCAGGCCAGAATCGATGCCATCAAGCAGTACATGCA  
CTTCCGCAAGGTCAGCAAGGATCTGGAAAAGAGAGTCAATTAAGTGGTTTGACTACTTGTGGACCAACA  
AGAAAGCCGTAGATGAGAGAGAAGTTCTGAAGTATCTCCCCGACAAGTTGCGTGCCGAGATTGCCATC  
AACGTCCACCTCGACACGCTGAAAAAGGTGCGCATCTTTGCGGACTGCGAGGCAGGGCTCTTGATCGA  
GCTGGTGCTCAAACCTGCGACCTCAGGTCTTCAGCCCCGGGATTACATCTGCCGAAAAGGTGACATTG  
GCAGGGAAATGTACATCATCAAGGAAGGGAAGCTGGCCGTAGTCGCCGATGATGGGATCACGGAGTT  
TGTGGTTCTGAGCGATGGCAGCTACTTTGGGGAAATCAGCATCCTGAACATCAAGGGCAGTAAAGCAG  
GGAACCGCAGAACAGCCAACATTCGCAGTCAAGGGTATTGATTTTGTCTGCCTCTCCAAGGACGAC  
CTAATGGAGGCCCTCACTGAGTACCCGGACGCCAAGGCAATGCTAGAAGAGAAAGGACGGCAGATCC  
TCATGAAGGACGGGCTGTTGGATCTAGAGGTAGCCAAGCTTGGACCCGACCCGAAGGACATGGAGGA  
AAAAGTCAACAAAATGTACGTAAGTATGGAGACTTTGCAGACGAAGTTTGCCAGGCTCCTGGCGGAGT  
ATGAGTCCACACAGCAGAAGCTGAAGCAGCGTGTACCCAGATTGAGAAGAAGATCACGGACCCTGG  
ACAGGTGGAGCCTTCTGAGCCGGTGGATCCAGAGGCAGGAGTAGCTTCTGCTGAGGCAGAAGCAAAG  
ACAGAATAG

>KT749721\_CNGA3\_Bluespot\_ray\_36860-6-1

ATGGCTACAGTCAGCACACAGCGGTCGTATCCAGCCCTTCACAGACTCTCGGTCAGAAACAATGATGA  
AGATCTGGAAAGGATAGAAAATGGCAGCAGCAGGACCCACTCGTTGTGTGAAGACTCGTCGTCTGAG  
CTTCAGGCAGTGACGTCTGCAGAACCTAAAGACCAGCATGAATCCCGGCGGAGTTCTTTACAGGCAA  
TGGAGCTTTTGGCAGGCTAACTAATTTTCATCATTGTGCTGAGGAAGTGGGCCACCCAGCAAATCCACG  
ATGAAGACCAGAGACCAGATTCGTTCTTGGAGCGCTTCAGGGGACCAGACATAAAGGATGTATCAAG  
CCGGGAGAGCAACACGCAGTCAGCCGCAGGTGATCCTGAGCACCAAGGCCGGAGTAAGAAGATTCTG  
GCAAAGTTCAATGTCAACAAATGCAACAACGAAGAAAACCTTTTGCCCCTTGGCACAGTTCAATGTAAA  
CAACAACAACAACACCAACAACAACAAGGATGGAGGCAAGGTGGAAGAAAAGAAAGACGTGAAAAA  
GGAGGAAAAGAAAGATGAGAAAAGAAGGAAGAAAAGAAAAGATATATACATTATTGATCCTGCAGA  
CAATCTTTACTATCGATGGCTGTCCATTATCGCAATGCCTGTGATGTACAACCTGGTGTATGCTTGTGTG  
CAGAGCTTGTGTTTGAAGAAGTTCAAACAAGCACCTTGCTTTATGGTTGGTGTGGATTATGTATCAGA  
TGCGATCTACATCGTGGATTCAATTGTAAGGTTTTCGAACAGGTTTTCTTGAACAAGGATTGCTGGTCAA  
AGACGGAAAGAAATTAAGAGATAATTACATGAAGATGCCTCAGTTTAAGTTGGATACCCCTCTCCCTTT  
TACCAACAGATTTAGCATACTTACAATGGGAATGAATTACCCTGAGGTGCGATTTAATCGTCTGTTCC  
GCTTCAGTCGAATGTTTGAATTTCTTTGATCGTACAGAAACCAGAACAACTACCCTAACGTATTTCGAA  
TTGGAAATCTTGTGTTTGTATATCCTCATCATTATCCACTGGAATGGCTGCATTTATTATGCAATCTCAA  
ATCAATTGGGTTTGGCGTGCATACTTGGGTCTATCCAACATATCCCACCCTGAATATGGACGACTTAG  
CAGAAAATACATCTATTGCCTTTACTGGTCCACCTTGACCTTGACCACCATTGGAGAAACCCCTCCTCC



AGTAAAGGATGAGGAATTTCTGTTTGTGGTCATTGACTTCCTGGTGGGAGTGCTTATCTTTGCAACCAT  
TGTTGGTAATGTGGGCTCCATGATCTCGAACATGAATGCCTCTCGGGCCGAATTCCAATCCAAAATTGA  
CGCCATCAAACAGTACATGCAGTTCCGTAAAGTGAGCAAAGACCTGGAGGTCAGGATCATTAAAGTGGT  
TTGACTACTTGTGGATCAACAAGAAGAGTATAAATGAGAAGGAAGTCCTCAAGAGCCTACCTGACAA  
ACTAAAGGCTGAAATTGCCATCAATGTCCACTTGGAAACACTAAAGAAAGTCCGAATTTTTGACAGATT  
GCGAAGCTGGCCTCTTAATCGAGCTGGTGCTAAAGCTGCAACCTCAGGTATACAGCCCCGGAGACTAC  
ATCTGCCGCAAGGGAGACATTGGCAGAGAAATGTATATCATCAAAGAGGGCAAACCTGGCGGTGGTGG  
CTGACGATGGGGTAACACAATTTGTGGTCTTGAGTGACGGCAGCTACTTTGGGGAAATCAGCATCTTA  
AACATAAAGGGCAGTAAAGCTGGGAACAGGGCAACAGCCAACATTAGAAGTATCGGCTACTCCGATC  
TCTTCTGCCTCTCCAAGGTTGATCTGATGGAAGCCCTGACTGAATATCCGGATGCCAAGAAGATTCTGG  
AAGAAAAAGGACGTCAGATTCTGATGAAGGATAATTTAATCGATGAAGAAGCAGCAAAAGAGGGGGC  
AGACCCGAAGGACCTGGAAGAGAAAGTGGAAGAATGGAGGCCTCCCTGGACACTTTGCAAACCAAG  
TTTGCCAGGCTCATGGCAGAGTACAAATCCACACAGCTCAAACCTGAAGCAAAGGATCACAAAGGTGG  
AAAATAAAGTAAAGAACTTTGGCAGTGGATACCTGTCTGATGGCTTTGACAGTGCGACTGATACCGAA  
GGAGGAAAATGA

>KT749722\_CNGA3\_Bamboo\_shark\_32916-1-2

ATGGCTACAATCAGCACCCACCAGTCATACCCACGGGTTACAGACTCTCGGTCAGGAATAACGACGA  
TGAGCTCGAGAGAATAGAAAATGGCAACAGCAGGACTCATTCACTGTGTGAGGACACATCTTCTGAAC  
TGCAGGGAGTGACCTCTATGGAGACCAAAGGACAGCCTGAATCCCGCCGGAGCTCTTTCACAGGCAGA  
GGAGCTTTAGCCAGGTTCACTCATTTTGTCAATCATGGTGAGGAACTGGACTACTCGACAAATGCACAG  
TGAAGATCAGAGGCCAGATTCTTTTTTGGAACGCTTTCGAGGACCAGAGATAAAGGATGTGTCAAGTC  
GGGAGAGCAACACCCAATCAGCTATCGGCAATCTGGAGCATCAAGGAAAGAGCAAAAGCTACAGGCT  
CCTGGCAAAATTCAACATCAACAATTGCAACAACAAAGAGGATGACAAGGTGGAAGAAAAGAAAGAT  
GAGGAAAAGGAAAGAAAAAATGATGAGAAAAAGAAGGAAGTGAAGAAGGATTGGTATGTCATTGAC  
CCTTCAGAGAATCTTTACTACAGATGGCTTTCTGTTATTGCAGTGCCTGTACTGTACAACCTGGTGTATG  
CTGGTATGCAGGGCTTGTTCGATGAACTTCAAGTAAGAAATCTTACCCTGTGGCTGGTTCTGGATTAT  
CTCTCTGATGTCATCTACGTTACAGACTCAGCTGTAAGATTCCGAACAGGTTTTCTTGAACAAGGATTG  
CTGGTTAAGGATACAAAGAAATTGAGACAGAATTACATGAGGATGCCTCAGTTTAAACTGGACGTGCT  
CTCTCTTTTACCAACAGATTTAGCCTACATTTGGTTGGGCTTTAACTACCCAGAGGTGAGATTTAATCG  
TCTCTTCCGTTTTAGCCGCATGTTTCGAGTACTTTGATCGCACGGAAACCAGGACAAATTACCCTAACAT  
GTTTCGAATTGGAAACCTTGTTTTGTACATCCTCATCATTATTCCTGGAATGGTTGCATTTATTATGCG  
ATTTCAAATCGATTGGGTTTGGTATTGACACCTGGGTCTATCCAAACATATCCCATCCTGAATACGGA  
CGACTTAGCAGGAAATATATCTATTGCCTTTACTGGTCCACTTTGACCTTGACTACCATTGGAGAGACA  
CCTCCTCCAGTGAAGGATGAAGAGTATCTATTTGTGGTCATTGACTTCCTGGTGGGGGTTCTCATCTTT  
GCCACCATTTGTTGGTAACGTGGGCTCCATGATCTCAAACATGAATGCATCTCGAGCCGAGTTCCAATCC  
AAAATTGACTCCATCAAACAGTACATGCAGTTCCGTAAAGTGAGCAAAGACTTGGAGGCCAGGATCAT  
CAAGTGGTTTGATTACTTATGGATCAACAAGAAGACGGTGGATGAGAAGGAAGTCCCTCAAAAACCTTC  
CTGATAAATTAAGGCTGAGATTGCCATCAATGTCCACTTGGACACGTTGAAGAAAGTCCGGATATTT  
TCCGATTGTGAAGCCGGCCTTTTGATTGAGTTGGTGCTCAAGCTGCAGCCTCAAGTGTACAGCCCCGGG  
GACTACATCTGCCGGAAGGGGGACATTGGCAGGGAGATGTACATCATCAAAGAAGGCAAGCTGGCAG  
TTGTAGCTGATGACGGGGTAACACAATTTGTGGTCTGAGCGATGGCAGTACTTTGGAGAGATCAGC  
ATCTTGAATATAAAGGGCAGTAAAGCAGGTAACAGGGCGCACTGCCAACATAAGAAGCATAGGCTACT  
CTGACCTGTTTTGCTTGTCCAAGCTGATCTGATGGAAGCCCTGACCGAGTATCCAGATGCCAAGAAG  
ATTCTGGAAGAGAAGGGCCGTCAGATTCTGATGAAGGATAACTTAATAGATGAAGAGGCAGCAAAAG  
AGGGTGCAGATGCAAAAGACCTGGAAGAGAAGGTGGAGAGGATGGAATCATCGTTGGATAGCCTGCA  
GACCAAGTTTGCTAGGCTCATGGCTGAGTACAATTCCAGTCAAATGAAGCTGAAACAAAGGCTGACAA  
GAGTAGAGAAAACAGTAAAAATCTATGGCAGTGGCTACCTATCTGATGGCCTGGACAGTTCAACTGAC  
ATAGAACTAGGAAAACAGTGA

>KT749723\_CNGA3\_Florida\_gar\_22780-1-1

ATGGCAACAATCAGTACTCAGCAATCTTACCCCGCTGTGCATCGGCTATCTGTCAGGACAAACGATGA  
CGACCTTGATAGGATCGAGAATGGAAACAGCAGGGCGCACTCACTGTGTGAGGACACCTCCTCTGAGC  
TGCAGACAGCGGTCTCCATGGAGACCAGAGGGCTGCCTGAGTCCCGCAGGAGCTCCTTCACAGGGACC  
GGCGCCATGGCCAGGCTCTCTCGGTTTCACTTTGCGTTAAGGAGCTGGGCTACCAGACGATTACATCAT  
GAAGACCAAAGACCAGACTCGTTTCTGGAACGATTTAGAGGTCCAGATCTAAAAGAGGCTTCTAGTCG  
AGAGAGCAATGCCAGTCAGCTACTGGAAACCCAGACCATCCACACAGGGGGAAGAACCAGCTGGCCG

CTGGCAAACCTTCAATATCAACAACACTGCAACAACACAGATGACAAAAAGGAGGACAAGAAGGAGGAG  
AAGAAAGAGGAAAAGAAGGAGGAGAAAAAAGAGGAAAAAAGGAGGAAAAGAAAGATGAGAAAA  
AGATGACAAAAAGAAAGAAGAGGAGAAGAAAAAAGAAGTATTTATTGTTGACCCAGCTACAGATCTC  
TACTACAGATGGCTTACTATAATTGCAACCCAGTCATGTACAACCTGGTGCATGCTTATTTGCAGGGCC  
TGTTTTGATGAACTGCAGACAAAGTATATTACTTTATGGATGGTTTTGGATTACTCTTCAGATGTCATCT  
ACTTCCTTGACACATTTGTGAGATTCAGGACAGGTTTCTAGAGCAAGGATTGCTCGTGAAGGACCCA  
AAGAAGTTACGAGAAAACACTACATGAAGACACCACAGTTCAAATTTGATCTACTCTCAATGGTGCCAAC  
GGACATAGCTGTGATTAAGTGGGGAACAACACTACCAGAGCTGAGGTTCAATCGCCTGTTCAAATTTG  
CACGCCTTTTTGAATTCTTTGATCGCACTGAACTAGAACCAATTACCCCAATATTTTTTCGAATAAGTA  
ACCTTGTCTTTACATTCTCATCATCATCCACTGGAATGCATGCATATTTTTTTGCTATTTCCAAAACCAT  
AGGCTTCGGAAGCGATACCTGGGTATATCCTAATATAAGTCACCCTGAGTATGGGCGACTGGCAAGGA  
AGTACATCTACAGCCTGTACTGGTCTACGTTAACACTCACCCTATTGGAGAGACCCACCACCAGTG  
AAGGATGTGGAGTACCTGTTTGTGTGTGCGACTTCCTAATAGGGGTGCTGATCTTTGCCACTATTGTC  
GGTAATGTGGGTGCCATGATTTCCAACATGAATGCCAACAGAGCAGAATTCCAGGCTAAAATTGACTC  
CATCAAACAGTACATGCAATTCGAAAAGTGTCAAAGACCTGGAAGCCAGAGTGATCAAGTGGTTC  
GACTACCTGTGGACGAACAAGAAAACGTGCGACGAAAAAGAAGTCCTGAAGAACCTGCCAGACAAAC  
TGAAAGCTGAGATCGCCATCAACGTCCACCTGGACACACTGAAGAAAGTGCGCATCTTCCAGGACTGC  
GAAGCCGGTCTCCTGATCGAGCTGGTGTCTAAGCTGCAGCCGCGAGGTGTTAGCCCCGGAGACTACAT  
CTGCCGCAAGGGGGACATTGGAAGGGAAATGTACATTATCAAAGAGGGAAAGTTGGCTGTGGTGGCG  
GACGACGGAGTCACGCAGTTTGTCTGTCTTGAGTGATGGCAGCTACTTTGGGGAAATCAGCATCTTAAA  
CATTAAAGGGAAGCAAGTCGGGCAACAGAAGAACTGCTAACATTCGGAGCATTGGCTATTCTGACCTCT  
TCTGTCTCTCCAAGGACGACTTAATGGAGGCCCTAACAGAATACCCAGAGGCCAAAAAAGCTCTGGAG  
GAGAAGGGGAAAGCCATTCTAATGAAAGATGGTTTGTATAGACGAGGAAGTCGCCAACCAAAGCGGGG  
ACCCGAAAGACCTGGAAGAAAAGGTGCGAAGAACTGGAATCCTCTCTCGACCTCATGCAGACCAAATTT  
GCAAGACTCATGGCAGAGTTCACCTCCAGCCAGGTCAAGCTAAAGCAGAGACTTACAAAAATGGAGA  
CCAAAATGAAGTCGCTGGGGAGTGGAGAACTCTGTGATGGTAATGAAGCAGACAGTGAAGCGCCGAA  
AGAAGAGGAGAAAAAGGACAAATAA

>KT749724\_CNGA3\_Bowfin\_24904-1-1

ATGGCCACAATCAGCACCCAACAGTCCTACTCGGCCGTGCACCCGGCTCTCGGTCAGGACCACTGATGA  
CGACCTAGACCGGATCGAGAATGGCAATAGCAGGAATAGCAGGGCACACTCTCTGTGTGAGGACACG  
TCCTCCGAGCTGCAGCGAGCCATCTCCATGGAGGCCCGAGGGCTGACTGAATCTCGCAGGAGCTCCTT  
CACGGGCACAGGTGCCATGGCCAGGCTATCGCGGTTAGTGTGTTGCACTAAGGAACTGGGCCGCCAGAC  
GATTACACCCCGAAGATCAGAGACCGGACTCGTTCCTGGAGCGGTTCCGAGGTCCAGAGCTCAAAGAG  
GCGTCGAGTCGAGAGAGTAACACCCAGTCTACCGCTGGGAACCCAGACCCGGCCACACAGGGCAAAGA  
ACCACTGGCCACTGGCAAACCTTCAATGTCAACAACACTGCAACAACACAGATGACAAAAAAGAGGATAA  
GAAAGAGGAAAAGAAAGAGGAGAAAAAGGAGGAGAAGAAAGAGGAGAAGAAGGAAGAGAAGAAG  
GATGAGAAGAAGGATGATAAAAAGGATGCAAAAAAGGACGATAAAAAGAAAGAGGAGGAGAAGAA  
AAATGAAGTGTATATTATTGATCCAGCAACAGATTTGTACTACAGATGGCTTTTCGATAATTGCAGTCCC  
AGTCATGTACAACCTGGTGCATGCTTATTTGCAGGGCTTGTTTTGATGAACTTCAGACAGACTACATTAC  
TTTGTGGAATGTTTTAGATATCTCATCAGATATAATCTACTACTTGGACACGTTTGTGAGATTGAGAAC  
AGTTTTCTGGAACAAGGATTACTTGTGAAAGACTCTAAGAAATTACGAGAAAACACTACGTGAAGACAC  
AGCAGTTCAAATATGATGTAATCTCAATGGTGCCAACGGACATAGCAGTGATAAAAGTGGGGAACAA  
TTACCCGGAGTTGAGGTTCAACCGCCTGTTTAAATTTGCACGCCTTTTCGAGTTTTTTGACCCGCACGGA  
AACCAGAACGAATTACCCCAACATTTTCAGAATCAGCAATCTCGTCCTCTACATTCTCATTATCATCCA  
CTGGAATGCATGCATATTCTTTGCCATTTCTAAGTCAATAGGCTTCGGGACTGACTCCTGGGTGTACCC  
CAACATAAGCCACCCAGAGTACGGGCGGTTGGCAAGGAAGTACATCTACAGTCTTTACTGGTTCGACCC  
TCACGCTCACCACAATCGGAGAGACTCCTCCTCCGGTGAGAGACGTCGAGTACCTGTTTGTCTGTTTGTG  
ACTTCTGATCGGAGTGCTGATCTTTGCTACCATTGTCTGGCAATGTGGGCGCCATGATCTCCAACATGA  
ACGCCTCCAGAGCAGAATTCCAGGCCAAGATTGATTCCATCAAGCAGTACATGCAGTTCCGTAAAGTC  
ACCAAGATCTGGAAGCCAGAGTGATCAAGTGGTTTTGACTATCTGTGGACGAACAAGAAAACGTGCG  
ATGAGAAGGAAGTCTTGAAGAACTTGCCCGACAACTCAAAGCAGAGATAGCCATCAACGTCCATCTT  
GACACGCTGAAGAAAGTGCATCTTCCAGGATTGTGAGGCCGGGCTCTTGATTGAGTTGGTGTCTTAA  
GCTGCAGCCCCAGGTATTCAGCCCGGGCGACTACATCTGCCGCAAGGGGGACATTGGGAGAGAGATG  
TACATCATCAAAGAGGGAAAGCTGGCCGTGGTGGCAGACGACGGAATCACGCAATTTGTCTGTCCTGAG  
CGACGGCAGTTACTTTGGAGAGATTAGTATCTTAAACATCAAGGGAAGTAAGTCAGGCAACAGAAGA  
ACTGCTAACATTAGGAGCATAGGCTACTCAGACCTCTTCTGTCTCTCCAAGGATGACTTGATGGAGGCC

CTAACTGAGTACCCGGATGCCAAGAAGGCTCTGGAGGAGAAGGGGAAAGCCATCTTGATGAAAGATG  
GCCTGATAGATGAGGAAGCTGCCAAACAGGGCACCGATCCCAAGGACCTTGAGGAAAAGGTGGTGAA  
GCTGGAGTCGTCTCTGGACCTGATGCAAACCAAATTCGCAAGACTGATGGCGGAGTTCACATCCAGCC  
AGACCAAGCTGAAACAGAGACTCACGAAAATGGAGACCAAAGTGAAGAAGATGGGGAGCGAGGAAA  
TCTCAGACGGGATGGAGGCAGATAACGAAGCCGCAAAAGCAGAGTAG

>KT749725\_CNGAX-Partial\_E\_cirrhatu\_139717-3-6+102332-1-3

TTCGTGTTGAATCCATCGGGCAACTTGTATTACAACCTGGCTCTTCGTAATCAGTGTGCCG  
GTGTTCTACAACCTGTGCCTACTCATCTGCAGAGCCTGCTTTGATGAACTGCAGATAAAA  
TACATCACACCTGGCTGATCTGTGATTACCTGTCTGATGCCATTTACCTGCTTGACATC  
TGGGTCCGGTTTCACACAGGTTTTCTGGAACAAGGACTCATTGTGTGCGATCTTCAACGT  
TTAAAAGAAAATTACGTGAAAACCTTGTATTTCAAGCTCGATGTTGTATCGGTGCTACCC  
ACAGATTTGGGATACTTGAAGCTGGGGTTGCATTGGCCGGAACCTTCGTTTCAATCGCCTG  
TTGCGTCTTCACCGAATCTCAGAGTTTTTTGGACGAGTTGAGACAAGGACGAACTTTCCA  
AACTTATTCGCATATCGAACCTCATCCTTTACATTGTGGTGATCATTCACTGGAACGCG  
TGCCTTACTTTGCTATATCAAAGATTATTGGGCTTGGCAGTGACACATGGGTGTACC  
CTGATGTATCGGACCCAGAGTTCGGGACACTCAGCAGGAAATATGTATACAGCCTTTACT  
GGTCTACACTGACTCTAACCACGATTGGCGAGACCCCCACACCATGCCGTGACTCAGAAT  
ACATATTCGTGGTTGTGGACTTCTTGGTTGGTGTCTTATATTTGCCACCATTGTGGGCA  
ACGTGGGGTCTATGATCACCAACATGAATGCAGCGAGAGCAACATTCCAGGCACGCATAG  
ACGCGATAAAGCAGTTCATGCATTTTCGTAAAGTCAGCCCCGAGCTCGAGTCACGCGTCA  
TCACATGGTTTTGACTACCTGTGGACCAACAACAAGCGGTGGATGAACGTGCTGTGCTTG  
GGTTCTTCCAGAGAAGCTCAGAGCTGAGATAGCAGCCAACGTCCATCTCAACACCTTGA  
AAAAGGTGCGCATTTTTGCGGATTGCGAGGCTGGATTATTGATCGAACTTGTGCTGAAAC  
TCCAGGCACAGGTTTTTCAGCCCCAACGATTACATCTGTGCGAAGGGAGACATTGGTCTGTG  
AGATGTACATTATTAAGAGGGTTCAGCTGGCTGTGGTGGCGGACGACGGGGTGACGCAGT  
TTGTGGTTCTTGGTGACGGGAACTACTTTGGCGAAATCAGCATTCTGAACATCAAGGGCA  
GCAAGAGTGGAACAGAAGAACAGCCAATATCCGGTCTATCGGATACTCTGACCTTACT  
GCCTCTCCAAGGACGATCTCATGGAAGCTTTAATAGAATATCCAGATGCAAAGAAGATGC  
TGGAGGAAAAGGGGAGGCAGATCCTCGTGAAAGATGGTCTCATAGATGAGGAGGCTGCAA  
ACGTTGAGGAGCCGAGGAACACAACCGAGCAACTTGACAACCTCGAGTCGGGTCTGG  
AGGCCACGAAGACACGTCTTGCCAGCTTTTTGGCCGAAACGTTTGCAACACATGCCGTGC  
TTAACAGCGGATCACACGACTTGAGATTCTGATGAAATTGGTGGAGGAGTGA

>KT749726\_EPTCI\_c139717\_g3\_i6

ATGCAGACCATCCAGCAGTTTCAGACCATAAGGAACAGGATTTTGAGAACACTGATCGGACTTTCTAG  
TAGTTCCATTTTTGAAGAAAACGAGGAGAGAAAAAGAACCTTTCCGGTATTCTCCAGACATTCGTGT  
TGAATCCATCGGGCAACTTGTATTACAACCTGGCTCTTCGTAATCAGTGTGCCGGTGTCTACAACCTGT  
GCCTACTCATCTGCAGAGCCTGCTTTGATGAACTGCAGATAAAAATACATCACACCTGGCTGATCTGTG  
ATTACCTGTCTGATGCCATTTACCTGCTTGACATCTGGGTCCGGTTTCACACAGGTTTTCTGGAACAAG  
GACTCATTGTGTGCGATCTTCAACGTTTAAAAGAAAATTACGTGAAAACCTTGTATTTCAAGCTCGATG  
TTGTATCGGTGCTACCCACAGATTTGGGATACTTGAAGCTGGGGTTGCATTGGCCGGAACCTTCGTTTCA  
ATCGCCTGTTGCGTCTTCACCGAATCTCAGAGTTTTTTGGACGAGTTGAGACAAGGACGAACTTTCCAA  
ACTTATTCGCATATCGAACCTCATCCTTTACATTGTGGTGATCATTCACTGGAACGCGTGCCTTACTT  
TGCTATATCAAAGGTAACCATTTGCAATTTGGAGAAATGTCAGTTGAAAAAAAATAG

>KT749727\_EPTCI\_c102332\_g1\_i3

TATAAAGTGCATTTAAAAGGGCCAACCTTCAAAAATGTAATCCCAAACCTCCCCAGGCTATTGGGCTT  
GGCAGTGACACATGGGTGTACCCTGATGTATCGGACCCAGAGTTCGGGACACTCAGCAGGAAATATGT  
ATACAGCCTTTACTGGTCTACACTGACTCTAACCACGATTGGCGAGACCCCCACACCATGCCGTGACTC  
AGAATACATATTCGTGGTTGTGGACTTCTTGGTTGGTGTCTTATATTTGCCACCATTGTGGGCAACGT  
GGGGTCTATGATCACCAACATGAATGCAGCGAGAGCAACATTCCAGGCACGCATAGACGCGATAAAG  
CAGTTCATGCATTTTCGTAAAGTCAGCCCCGAGCTCGAGTCACGCGTCATCACATGGTTTGACTACCTG  
TGGACCAACAACAAGCGGTGGATGAACGTGCTGTGCTTGGGGTTCTTCCAGAGAAGCTCAGAGCTGA  
GATAGCAGCCAACGTCCATCTCAACACCTTGA AAAAGGTGCGCATTTTTGCGGATTGCGAGGCTGGAT  
TATTGATCGAACTTGTGCTGAAACTCCAGGCACAGGTTTTTCAGCCCCAACGATTACATCTGTGCGAAGG  
GAGACATTGGTCTGTGAGATGTACATTATTAAGAGGGTTCAGCTGGCTGTGGTGGCGGACGACGGGGTG

ACGCAGTTTGTGGTTCTTGGTGACGGGAACACTTTGGCGAAATCAGCATTCTGAACATCAAGGGCAG  
CAAGAGTGGAACAGAAAGAACAGCCAATATCCGGTCTATCGGATACTCTGACCTCTACTGCCTCTCCA  
AGGACGATCTCATGGAAGCTTTAATAGAATATCCAGATGCAAAGAAGATGCTGGAGGAAAAGGGGAG  
GCAGATCCTCGTGAAAGATGGTCTCATAGATGAGGAGGCTGCAAACGTTGAGGAGCCGAGGAACACA  
ACCGAGCAACTTGACAACCTCGAGTCGGGTCTGGAGGCCACGAAGACACGTCTTGCCAGCTTTTTGGC  
CGAAACGTTTGCAACACATGCCGTGCTTAAACAGCGGATCACACGACTTGAGATTCTGATGAAATTGG  
TGGAGGAGTGA

>KT749728\_CNGAX\_G.\_australis\_57616-1-3

ATGGGACGCAAAGCAACAACACAAACATAGGTGACTGCAGCAACAGCAATAACAACAACAACAAA  
GGCGACAACAACGACGATGACAAGGCCGACAAGGATGGGGTCCCGACGAAAGAAGAGCCCAAACCC  
GCACCTCCACCGCCTCCTCCGCCCCCACAGAGACCCCACTCCCCGAAGGAGGTGTTTGTGCTGGA  
CCCCTCGAGTACTCTACTACCACTGGCTGTGCGTGGTGTCCATTCCCATCATGTACAACCTCCTCAT  
GCTCGTGTGCCGGGCGTGTTTTGACGAGCTGCAGACTGAACATACTACACCTGGATGACGCTGGATC  
TTCTGTGCGACCTGCTGTACCTTGTGGACACCTGGGTTCGCTTACATACAGGGTTCCTGGACCAAGGTC  
TCATCGTGCAGACCCAAAGCGTCTTCGACATAACTACACGAAGACGCGGACCTTCAGACTCGACATC  
ATCTCCATCCTTCCCACCGACATCGTTTACATATGGCTCGGCCCGAACTTTCGGGAGGTGCGCTATAAC  
CGCGTGGTTCGCATCTACCGCATGTCCGAGTTCTTCCAGCGCACGGAGACGCGCACCAACTTCCCAA  
CCTCTTCCGCATCTCCAACCTCGTCCTCTACATCGTTCGTCATCATCCACTGGAACGCGTGCCTACTTC  
GCCATCTCAAAGGCCATCGGGTTCGGCTCTGATCAGTGGGTTTACCAGATGTCAACATCCCCGAGTA  
CTCTCATCTCATGCGCAAGTACGTCTTCAGCCTGACTGGTCGACTCTGACGCTGACGACGATCGGGCA  
GACGCCGCCGCGGGCGCGGACGAGGAGTTCGTGTTTCGTGGTGTGCGACTTCCCTCGTCGGGGTCCCTCA  
TCTTCGCCACCATCGTCGGCAACGTGGGCGCCATGATCTCCAACATGAACGCGGCGCGCGCGGAGTTC  
CAGACCCGCGTGGACGGGGTGAAGCGCTACATGCGTCTGCGAGGGGTGACTCGGGAAGTGCAGGAGC  
GAGTCGTCGCGTACTTCGACCACGTGTGGGCGTACGGCAAGGCGGGCGACGAGGCGGGCCGTGCTGGC  
CTCGCTGCCCGTGCGGCTGCGCGCGGAGGTGGCCTCCAACGTGCACATGGAGACCATCAAGAAGGTTTC  
GAATCTTCGCGGACTGCGAGGCCGGGCTGCTGATCGAGCTCGTTCTGAAGCTGAAGCCGCAGGTGTTTC  
GGCCCCGGGGAGTACATCTGCCGCAAGGGAGACGTGGGGCGAGAGATGTACATCGTCAAAGAGGGCC  
GTCTGGCTGTGGTATCGGATGACGGACTCAAGCAGTTCGTGGTTCGTCTTCTGGAAGCTACTTTGGAG  
AAATCAGCATCCTCAACATCAAGGGGAGTAAGTCCGGTAACCGGGCGCACAGCCAACATCGTGAGTGTC  
GGTACTCGGACCTGTACTGCCTGTCCAAGGACGACCTCATGGAGGTCCTACTGAGTACCCGGACGC  
CAAGCAGGCCCTGGAGGAGAAGGGCCGGGCCATCCTCATGAAGGACGGCCTTATCGACGAGGATTGT  
GGCAACTTGGGGCCCGACGCCAAGACACTCGACCAGAAGGTGTCCCGCCTGGAGACGATGCTGGACG  
GGGTGCACACCCGCCTCGCGCGCCTCCTGGCGCAGCAGGGATCGAGCGTGGCGTCGACGCGCGCCCGC  
CTCACCTCCCTGGAGACGTCCGTGTGCGGGATTTACTCGGCGCTGGGCAACGCGGCTCCCAGGATCCT  
CACCGTCACCGTGCCGCCCCGACGAGTGA

>KT749729\_CNGAX-Partial\_M.\_mordax\_41352-3-3

GCCGCCGCGCGGGCCGCGCTCTCGGCCCGCGCCCCGAGCTGCGCTTCAACCGCCTCCTCCGCTGCCG  
CGCCTCCTCGAGTTCTTCGAGCGCACGGAGACGCGCACGGCGCGGCCCAACGCCTTCCGCGTCGCCAA  
CCTCGTCCTCTACATCCTCGTCATCGTGCACCTGGAACGCGTGCGCCTACTTCGCGGGCGTCGCGCGCCAT  
CGGCTTCGGCGCCGACGCCTGGGTCTACCCGGACGTGCGGCACCCGGAGCACGGGCGCCTCGCTCGCA  
AGTACGTCTACAGCCTCTACTGGTCGACGCTCACGCTCACGACCATCGGCGAGACGCCGGCGCCGGTG  
CGCGACGAGGAGTACGCGTTCGTGTCGCGGACTTCCCTCGTCGGCGTCCCTCGTCTTCGCCACCATCGTG  
GGCAACGTGCGGCGCCATGATCGCCAACGCCAACGCCACCGCGCCGCCTTCCAGGCGCGGGTTCGACGC  
CGTCAAGACGTACATGCGGTCGCGCGGGCGTCCGCGCCGACGTGAGGCTCGCGTCATCCGCTGGTTTCG  
ACCACCTCTGGAGCAGCCGCAAGGCGGGCGGACGAGCGGCAGGCGCTCGGCGGGCTGCCCGACAAGCT  
GCGCGCCGAGATCGCCATCAACGTGCACCTCGACACGCTCAAGAAGGTCTCGATCTTCGCCGACTGCG  
AGGCGGGACTCCTGGTTGAGCTCGTGCTCAAGCTCCGGCCCCGTGGTCTACAGTCCCGGGCGACTACATC  
TGCCGCAAGGGCGACATCGGCGCGGAGATGTACATCATCAAGGAAGGCAAGCTGGCCGTGCTGGCCG  
ACGACGGCGTACCCAGTTCGTGGTGTGCTGAGCGACGGCGCCTACTTCGGCGAGATCAGCATCCTGAGC  
ATCCGCGGACGCTCTCGGGCAACCGGCGGACGGCGAACATTCGACGCGTCGGCTACTCCGACCTCTT  
CTGCCTCTCAAAGGACGACCTCATGGAGGCGCTCACCGAGTACCCCGACGCCAAGGCGATGCTCGAGG  
AGAAAGGGCGAGACATCCTGATGAGGGACAACCTCATCGACCCGCGCGTCCGCGCCCGGAGACGG  
GGCCGGCGGAGACGGGGCCGGCGGGGATCTGGGCGAGCGGGTGGCGGGCGGTGGACGGAGCCGTGCG  
GGTGTCTCGGAGAGAGGCTCGCGAGA

>KT749730\_CNGB1\_Bluespot\_ray\_37057-10-2

ATGACCTTAATCTTCCTTGCAGACTGCTTGCTTAATCTCCCTATAGACCTGCAGTGCCTGAGGGTAGTA  
GTTCATAACACACCACACCGGACTTTCGGGAATGGCACCTGCTCTCTGACCCTTCCAGAGCGCAGGAT  
GTTTACCTGGATTGCTAAAGTTGCTCCACAACCCACAGCCAGTTCGACATCTGGAGACTAGCCCTGA  
GGCTAAAGGAGACTCCACACCTGCAGAGGAACAGGAAACAGTGAAGGCTGAAAAATCTAAAAATGAA  
GCAAGTGGCTGTTGTGATGCAGGAACACAGGGTGTAGGCTGACCAGACGGCAGACGCCAGTTCTGGGG  
GTGGAGTCCTGGTCTGGATTGTGCAGCAAATGAACAGATTTAACCTACCTAAAGCTGTGCTTGATTCTG  
AGAAGAATGCAGGGAATCAGGAAAAGGAACCAAGCAAAGAATCTACGACACCTTCTCCAGCTCCAGA  
ACCCGCACCTCCTCCAGCTCCAGAACCAGCACCTTCTCTAGCTCCAGAACCAGCACCTCCTCCAGCTCC  
AGAACCAGCACCTTCTCTAGCTCCAGAACCAGCACCTCCTCCAGCTCCAGAACCAGCACCTTCTCTAGC  
TCCAGAACCAGCACCTCCTCCAGCTCCAGAACCAGCACCTTCTCCAGCTCCAGAACCAGCACTAGTTC  
CAGAGAAAGCTCCAGCTCCCAACATCCAATTATCAGGTCAACCATCTGTTGGAGGAGCCCCATCTGAC  
CAGCATCAGCAAGACAAGGACAGAAGAGGTGGAGTCCTCAGCTGGTTTGTGCAAGGGCTCAAAGGGG  
TATTGCCACAACCTGAAGAAAAACGGAAACCGACTGAAGCTGCTGAAGTGAGCCCTGCCCTCAGCTG  
ATAAAAGAGGAACCTGTAAATCCACAAAAAGAAGAACCAGCCGTTGACACAAGGCCTGAGCCAGAGA  
TCAAACCTCAGCAAGAAGCTGAAGTGAAGGAGGAAGTTGTGGCCACTGAAGCTCCTGAAGAACCCAT  
TAATCACCAGGCAGAATGCTCGACAAGCTCTGCTCCCACTGGCACCATCATTGAAACACTTCACTCATC  
TGCAAGTGGAAACAGCTTATTTGAATGGCTGAAACAGAGTCTGGAGAAAGTGATTCCACAACCAACA  
GGGATCGCCATGCCTGCCTCAACCAAAGTGGAACTGAATCAATAACAGAAAAACAAGGTTCCAGTGG  
AAGAGAAGGATCCAGAGGTGAAGGTGGCAGAAATTACAGAGGAAGTATCAAAGCAGTCACTATCAT  
AGAAGTTGCTCCAGCAGAGCCCATCCAGATCCCGTAGTGAAGGAAGCAATGCCTGAGGGAACTGCT  
AAGACCAGTGAGGATGACAAAAGTGTCTTCAGTTGGCTGGTACAAGGTCTTGGGAAAGTTGTGCCACA  
ACCAGTCACCAGATCCCAGTTACCAAAGGAGGATGTTGAGACAACCTGCTGCATGTTCTGCAGAAGAAG  
CCCCAAGTGAGATGGTGTGGGAAGACGTTGATTCTGATTGGGATGAAGAGGCTCAGTGCCATGATGCT  
GAAGCACAAACAAGTGAGTGTGAGACACTGGAGCAGCTCACGAAACAAGTCATAAGAATTGAAGTGA  
CACCGGTGGGTTCAAGCCAGCTGTGGAATATCACAGAGGAACCAGAACCCTGAGACAGATCCAATGCT  
GCCGTGTGAGGAAATCGAAAGCAATGAAGATGTGCAATTGACAGGGCCAGTGCTGATACACGAGGAA  
GTCAGCTGCTGTGAGGATATTCCAGCGACAGACAGCGGACAGGAAAAGGAGTGTGAAGAAATCGACC  
AAAATGAGGATCCTCCAGTTATTGACACAACGGAAGAAGAAGCAAGCAGTGAGGACCAGCCACCAGT  
TCTTGACCAGAATAGTGTCTGCCCTGAGGGGACAGAGCAGATTGTGCAGCCATATTATGACGAAGTGG  
TCGAATATCAATTAATTGAAGCTGCTGAAGCTAGCCACCAACATGAGGAGGAGGAGGTTCTGAAGACT  
AAGTTAGAACAAGAAGATCCTCCTAATGCCTCGTGGCCTTCAGTGAAAATTGAAGATGTGGATTCTGA  
AGGAGATTCTTTAAAATCAGGACAGAATAAGTTGCCCTCAAATTGAGTCATCCTCCTCAACAAGCAAGG  
GCGGGACACTTGCAGTGCCAGCATCCACAGGACAGCACGAAGAAATAAGCCATCGTCCCATGAAGC  
CAGTGCAGGGGAGCCAACCCAGGAGTTACACGGTGAAGCTTGGCAAAGCCAAACAAGTCTTCAGGTT  
GATGATAGTTTCAGATCTCAGCAGGGTTCAACATCAAGCATTACTAGTGCTATTGTTAATGAGCGCCTC  
CAGGAATTGGTTAAACTCTTTAAAGAACGAACGGAACAGGTCAAAGAAAAGCTTATTGACCCTGATGC  
ATCTGAGGATGAGGGAAGCCCAACTGCATCACCCCTCGAAGGCAGCTCCGGCAGCTCCTGCCCCACCCC  
CAGAGGAGAAAAAGGAGGATGAAGAGAAGGAGGAGGAGCACTACTGTGAAATGATGTGCTGCCGGT  
TTAAAACAAGACCTTGGTTCAGGCGAATCAAATCCGTGGGACTTCCATCCAGCGTTGATCCTTTTCAGCA  
ACCCTCTGTATGTTCTGTGGTTGTCCATCGTGGTATTAGCCTGGAACCTGGAATGTTTGGTTAATCCCCGT  
GCGCTGCACCTTTCCCTACCAAACGCCCCGATAACATCCATCTATGGCTATTAATGGATTACTTCTGTGA  
TCTGATTTACCTGACGGACATGATTATTTTCCAGTCTCGTCTCCAGTTTGTAAAAGGAGGAGACATTAT  
AACAGCACGGAAGCTTATGAGAGAAAACCTAAAAACCCAGAAATTTAAAATGGACTTGGTGTCC  
CTTTTGCCTTTGGATATTTTGTACCTTAAACTAGGTTTCAGAGTATTGCTGAGAGTTCCACGCCTCTTGA  
AGTACATGACCTTTCTTGAATTTAATGATCGACTGGAAGCAATAATGAGCAAGGCTTATATTTACAGA  
GTGATAAGGACGACAATATACTTACTGTATAGTCTCCACATAAATAGTTGTCTATACTATTGGGCATCT  
GACTATGAGGGCATTGGATCCACAAAGTGGGTTTATGATGGTGAGGGTAACAGTTATATGAGGTGCTA  
TTACTGGGCTGTGAAGACACTGATTACAATTGGAGGGCTACCTGACCCAGAGACAGTGTTTGAATTT  
TCTTTTCAGCTTGTCAATTACTTCATGGGAGTCCTCATCTTCTCTATCATGATCGGCCAGATGAGGGATG  
TGGTGGGTGCAGCTACTGCAGGACAGACTTACTATCGAACCTGTATGGATAAACTGTGAGATAACATG  
AACTTGTACAAAATTCTCGAGGTGTCCAGAACCGGGTGCAGGAAGTGGTATGAATTTACCTGGGAGTC  
ACAAGGAATGCTGGATGAAACCGAGCTATTGGTACAGCTCCCTGACAAAATGAGACTGGACATTGCCA  
TTGACGTCAATTACAGCATTGTCAGTAAAGTCGCACTCTTCCAGGGCTGTGACAGGCAGATGGTTTAC  
GACATGCTGAAGCGACTCAAGTCAGTTGTGTATCTGCCTGGGGACTACGTTTGTAAAGAGGGAGAGAT  
TGGGAGAGAAATGTACATCATTAAAGCTGGAGAGGTCCAGGTTGTTGGTGGCCCTGATGATAAGACTG  
TGTTCTGACTCTGCGAGCAGGCTCCGTGTTTGGTGTGAGATCAGTTTGTGCTGTCAGTGGGAGGCGGGAAT

CGGAGGACTGCAAATGTTGTCGCTCATGGATTTGCAAATCTTTTCATCCTCGACAAGAAAGACTTGAAT  
GACATTCTCATCCATTATCCGGATTCTCAGAAACTGCTCCGAAAGAAAGCTAAAAAACTTCTTTCTAAA  
GATGGTGGAAAAGCAGTAAAGCCAGCACCAAAGGATTCCAGCACATCATCCCACCCAGACCTGAGA  
CTCCTAAATTATTTCTCGCAGCCCTCTCAGTAGCAGGGAAGTATGGAATCAAAGGAACATTCTCTCTTA  
TTAAGAAGAACTTATGGAATCTGCCAGCTTGACAGCCTATCCCACAACCTCCTCCCTCTCCTGTTTCATC  
GCCGGTCACCTGTTTCGGTAAAAAAGCTGGAGGACGTTGATGATGATGATGATGAGGTTATTTTCAGAA  
ACAGTGGATTCTCTGTTCATGATCAAGATGTCTCCTTCACACGATGGGTTAAAAGAACAAATTCTGTCC  
GTGGAGGTTCCAGACGTAGAAGAAAAGTCAGAAAAGTGA

>KT749731\_CNGB1\_Bamboo\_shark\_41853-1-3

ATGTTTACCTGGATAGCAAAAAGTTGCCCCACAACCACCTCAGCCAGTCAAGCATCTGGAGATCACACC  
TGAAGTTAAGAGTACCTCTCAACCTGCAGAGGAACTACAAGAAGAGAAAACAGAGAACTTTACAGAA  
AATACAGAACAAGCCTCCTTACCTAAAAATGAAACAGACATCCCTTCTAACCAGGAGAAACACAGG  
CTGAACCTGACCAGGTGCCAGTACCTAGCTCAGAAACAAGTGTGGAGGTTGGGGTCCCTAGTCTGGATT  
GCGCAGAATCTAAGCAGACTCATTCCACAACATCTTGGTAGCCCCACACTGCCAAAAGCTGCACCAGC  
TGAATCTGAAAAGGAAATAGAGATTAAGGAAGAAGAACCAATCACAGTTCAGATCCAACACCAGCT  
CCAGATCCGGCTCCAGTTCTAGATCCAGCTCTGGTTCCGGAAAGTGTTCAGCTCCAGATGACCAACC  
ACTAAATCGGGCAACTCCTATTGCAGAAAACCCATCGATCCAGGACCAACGGGATGGAGGTCGAAGT  
GGTGGAGTGTTCAGGTGGTTTGTACAAGGGCTGGAAAAAGTGTACCACAACCAGAAGGAAAATCTA  
GACCAACCAATGTTCAGTGTGGTGGCAGCTGAGGTGTCCACTGCTCCCAGGAGGAACTGCAAAAAGC  
ACAGACAGAAACAATCCACTGCTGAAACAATGCCTGAGCCTGTGGTTAAACCTGAACCTGAACCTGAAC  
CTGAGCCTGAGCCTGAGCCTGAGCTGAAAGTAGAAGTTGCTGTGGTACCTGAGACTCCTAAAGAGGCT  
ACTGTCCAGCAGGCAGAACTCCCTACAGATACTGGTTCCATTGTTCAGTGTATTGAAATGCCTCAGTCG  
TCAGCTAGTGGCAGCAGTATGTTTGGTTGGGTGACACAAAGCCTGGGAAAGGTGATCCCTCAGCCTGT  
AGGGAGCTCTGTGCCTGTAACCTGCCAAAGTGAAAATGGAGCCAGCACCCCAAGAGTATGAGGTCCCA  
GTGGAGGAGAAGGAACCAACTGAATGTGACTAATGTTAATGAGGAAGTGCCCAAAGCTGTCACCA  
TTATAGAAGTTGTTCCAGCTGATCCAACCCAGAACCGATAGTGAAGGATGAGAATCAGCCAGCAGGA  
GAGCCAGTCACTAAAACAAGCAATGAGGAAGCTAAAAGTGTCTTCAGTTGGCTAACAAAAGGTCTTG  
GGAATGTTGTGCCACAGCCAGTCATCAAATCCCAATTAACAAAGGAGGATGACAGGACTATAACTGCA  
TGCCATGCAGAGGAAATCCAGTTTGTATTCCAAAGGAGATGGAGTTGGAAGATATTGAATCTGACTG  
GAATGAAGAGGTTCAATACCTTGATGCTGAAACTCAAACAAGCGAGTGTGAGGCATTGGCACAGGTC  
AAAACACAAACCACAGCCACAGATGTAACAGTGGTGAAGCAGAGTGTGAGATTCCAGAGGAAGATG  
AAGAAAGGCAGTTATGGAGTATCACTGAGGAGCAGGAGGTAGAAGCAGAAATTGTGAAAGTGTGTGA  
AGGATCTGAGAGCAGTGAAGATCTACCCAGTGAAGAGGCAGAGACGGTATGCGAAGGGACCAAGAGC  
AGCGAGGATCAATCACCAACAGATTTGGTGCAGATTTGTGAAGAAGCCAAGACAGATGATAATCTACC  
AGCAGCAGTTAACCTGACTGCCATCTGCTCAGAGGAGAGTGACCAGACTGTGCCACCAAAGCTTGATG  
AAGAAGCCTCTGAAGATCAAGTCCCTGGCAACAGTTGAGAACAGCCCCTCTCAACAGGAAGAGGAGAT  
TTTGAAGAGTGAGTTGGATCAAGGAGATCCTCACACAACACTGTGGCCCTCAGTCAACATTGAAGATG  
TAGATTCTGAAGGTGTTACTTTAACACCTGAGAATGGCCAGTTGCCACCAACTAAAGTGCCCTCTTAC  
CATAACAAGAGTCGGACACTTACAGTGCCAGGTGTCCCCATGTCAGCACGAAGAAGTAAGTCTCTCTAT  
CATGAAAACGTGGATGAACCCTCCGAGGAGTTACCAGTGCAAGCTTGGAATAGCCAGACCAACCTCCA  
GGTTGATGATAGTTTCAGAGATAAACAGGGGCTCAACAACAAGTATTACTAGTGCTATTGTGAATGAGC  
GCCTCCAAGAAGTGGTGAAGAAGCTTTAAAGAACGAACAGAACTGGTAAAGGAAAAGCTTATTGACCC  
CGATGCATCTGAAGATGAAGCAAGTCCAACCTGCATCACCACCAAGAAGGCTGTGGAAGCCCCTGCTC  
CACCTCCTCCCCAGAGGAAGAAAAGGAAGAGGACGAAGAACAACACTACTGTGAAATGATGTGCTGCCG  
GTTTAAAACTCAACCTTGATCAGACGGATTAGAGGACTGGGGTTTCCATCCAGCGTTGATCCCTTCAG  
CAATCCAATGTATGTGCTGTGGTTATCCATTGTGGTCTTTCGCTGGAATTGGAATGTCTGGTTAATCCC  
TGTGCGTTGTACTTTTCTTATCAAACACCTGATAATGTCCACCTGTGGCTGTTGATGGATTATTTCTGT  
GATCTGATTTACGTGATAGATATGGCTTTTTTCCAGTCTCGTCTTCAGTTTGTTCAGGAGGAGACATT  
ATAACAGCAATAAAGCCTATGAGAGAAAATTACATGAAAACACCTAAATTCAAGATGGATTTAGTTTC  
GCTTTTGCCGCTGGACATTTTGTACATTAAGTTAGGTTTCAGACCTGTATTAAGGTTCCCGCGCCTCAT  
GAAGTACATGACCTTCTAGAAATCAATGACCGGCTGGAGGCTATAATGAGCAAGGCCTATATATATA  
GAGTTATAAGGACCACAATATATCTGTTGTACAGCCTCCATATAAATGCCTGTCTATATTACTGGGCAT  
CTGACTATGAGGGAATTGGAGCCACAAAGTGGGTCTATGATGGTGAGGGGAACAGTTACATGAGGTG  
CTACTACTGGGCTGTGAAGACTCTGATTACAATTGGAGGGCTACCGGACCCGCAGACAGTATTTGAAA  
TCCTCTTTCAACTTGTCAATTATTTACAGGAGTCTTTATCTTCTCAATTATGATTGGTTCAGATGAGAGA  
TGTGGTGGGTGCAGCCACTGCTGGACAGACCTATTTTCGAAACTGCATGGATAACACTGTGAGATATA

TGAATTCTTACAGAATTCCTCGATTCGTTTCAGAACAGAGTGCACAAGTGGTATGAATTCACCTGGGAAT  
CACAAGGAATGCTGGATGAGACGGAGCTGTTGGTGCACCTTCCTGACAAGATGAGACTGGACATTGCC  
ATTGATGTAACTATAGCATCGTCAGTAAAGTGGCACTGTTTCAGGGCTGTGACAGACAGATGATTTAT  
GACATGCTGAAACGACTGAAAGTCAGTGGTGTACCTGCCTGGAGACTACGTGTGCAAGAAGGGAGAGA  
TTGGAAGAGAAATGTACATCATTAAAGCTGGAGAGGTCCAGGTTGTTGGTGGCCCTGATGGAAAGACT  
GTGTTTGTGACTCTACGAGCAGGTTCTGTATTTGGCGAGATCAGTTTACTTTTCGGTTGGAGGAGGGAAT  
CGACGGACCGCAAATGTCGTTGCTCATGGATTTGCAAACCTCTTCATTCTTGACAAGAAAGACTTGAAT  
GACATTCTAACCCACTATCCAGATTCTCAGAAACTGCTGCGAAAGAAAGCTAAGAAACTCCTCTCTAA  
AGATGATGGAAAAGATGTAAAGCCACAACCAAAAAGGAATACAGCATATCATCCCTCCAAGACCAGAG  
ACTCCCAAATTATTCTTGGCAGCCCTCTCAATAACCGACAAATTTGGAATCAAGGGAACATTCTCGCTT  
ATTAACAGAAACTCAGGGAATCTGCCAAAATGAAGCCTCATCCGATGCCTCCTGCCTCTCCTGTCCAT  
CGCCGATCACCTGTTCCAGTAGAAAAGGTGGAGGATGATTATGATGATGAAGTAGTTTCCGAATCTTC  
GGATTACTCTGTAGTGATCAGAATGAGCCCCTCACACCGCAAGGATAAGGAACAAATCTTATCTGTAG  
AAGTTCAGCTGAAGAAGAAGAGGATTCTGAAAAATGA

>KT749732\_CNGB1\_Florida\_gar\_28066-1-2

ATGCCCTAGAGGAGACCCCGCTCTGCAGGAGGCCAGCCAGGAGCCCCCACCACCCCGGATCCT  
AGCCATGCAGCAGGAGGACGCAGAGACGCAGACGGAGCGCTGGACGCCTCTTCTGCAAGCCATCCAG  
CAGGAGGCAGAGGCTGCCGCCAGGGCGGCGCTAGAGGACAGACTCAGACAAGAAAAAATGGCGACA  
GAAAAGACCACAGAGGAGCTGGGTGAAAGGGCCGAACAATCAGTGGGAGAGCTGGACGATGGGGAA  
CAGCGCTCCTAGTGGACGTGTGTCCTGCAGGCGGCTTCCCTAGCGCCCTCCACACCGAGCTGGGCGA  
GGACGGGACTCCCGCAGCGTCCGAGGGAAGCCCAGCTCCGCCCAGGCCGCTACAGAACCGGAGGAA  
GAGCCCGTGAGGGAGGGTCCCCAGGGAAGCAACAGTCCCCGGTAGGAGAGGCATGTGCCGTACAAG  
AGCCTGAACCAGAACCCGAACCAGAACCCGAACCCGAACCCCAACCGGAACCAGAGCCCGAACCAGA  
ACCGGGACCGGAACCAGAACACGAGCCAGAGACTGGACCCGAACCTGGAACCCGAACCAGAACACGA  
ACCAGAGACTGGACCAGAACCGGAACCAGAGCCCAGAACCTGAACACGAACCAGAGCCTGGACCAGAA  
CCAGAGCCCGAACCAGAACCAGAAGCAGAACCTGAAGCAGGGGAAGGGGGCTCACCAGCACAGCAG  
CCTCAGCGGGTGCAGGAGTCCCCCGTGAGGGAGGTGCCGCCTGCAGAGGACCTGAGGGAAGAAGAAG  
CGCAAGAGGCAGAGCCTGTGACACAGCAGCCCGACACAACAGAGGCGCTGGAGCCCCCTGCTGGTGC  
CCACCAGGAGGAGGAGTCCCAGGCTGTTGAAGAAGAGTGTGGCGAGAGCTCCAGGCTGAGCATTAC  
CCTTCTGTCAATGTGGAAGATGTGGATTCTGACGGAGATGCGAGTGGGGGTACCAGAAAACGTCTCC  
TGTCATTCTCCCCTCATCCCCGTACACCAGCAAGACCCTCACGGTCCAGGGGTGCCCGTGGCAGCTCG  
AAGCTCATCTCCAGATAAAGAAAAGAAGCTGTACTCCAGGAGGAGAGCATGGAGGACGCAGAGACC  
ACAGTGAAAGCCTGGCCCAGCCAGACCAGCCTGCTGTCAGAGGATGAGATGAGGGAGAGGCCCGCGT  
CAGCCGCCAGTCAGACCAGCACCATCGTGAACGAGCGCCTGCAGGAGCTGGTGAAGATGTTCAAGGA  
ACGGACGGAGCGCGTGAAGGAGAACTCATCGATCCCGACGAATCCGACAAAGACAGCCCTTCCGCC  
ACTCCAGAGAAGAACTCCCACCTCCTCCCCCTCCCCCGGAGGAGAAGAAAGAGGAGCCAGCGCCTA  
AGAAGGAGGGCGAGGAGCACTACTGCGAGATGCTGTGCTGCAAGTTCAAGACCATGCCCTGGATGAC  
ACGGCTGAAGGAATACCGCTTTCCCAGAGCATCGACCCCTTACCAATCTGATCTACGTGCTGTGGCT  
CTTCTTTGTACGGCGGCTTGGAACTGGAACGTGTGGCTGATCCCGGTGCGCTGGGCCTTTCCCTACCA  
GACCCCTGACAACATCCATCTCTGGCTGCTCATGGACTACCTGTGCGACACCATCTACATCCTCGACAT  
CCTGGTCTTCCAGCCTCGTCTGGAGTTCGTCCGAGGTGGAGATATTGTGTGTGACAGAAAGGATATGA  
GAGAAAACATACATGAAATCCCATCGCTTCAAGATGGATCTCATAGCTCTTTTCCCTCTGGATTTGTTGT  
ATTTAAAAGTTGGAGTTAACTCTTTGCTGCGATTTCTCGTTTACTGAAGTACATGGCTTTCTTTGAATT  
CAATGACCGCCTGGAAGCAATCATGAGCAAAGCTTACATCTACAGAGTCATCAGGACCACTGCCTACC  
TGCTCTACTCCCTGCACTGCAATTCCCTGTCTCTTCTACTGGGCGTCTGACTACGAGGGCCTCGGGTCCA  
CAAATGGGTCTATGACGGAATCGGGAACAGCTACATCCGCTGCTACTACTTTGCAGTGAAGACTCTG  
ATCACCATCGGGGGGCTTCCAGACCCACGACCCTCTTTGAAATCATCTTCCAGCTGATCAATTACTTT  
GTTGGGGTCTTCGCCTTCTCCATCATGATTGGGCAGATGAGAGATGTGGTGGGAGCTGCCACAGCTGG  
CCAGACGTATTACCGCGCCTGCATGGACAACACCATCAAGTACATGACCTCCTACCGCATTCCCCGTG  
ACGTGCAGAACCGCGTCAAGACCTGGTACGACTACACCTGGCAGTCCCAGGGCATGCTGGATGAGCA  
AGAGTTGCTGATCCAGCTCCCAGATAAAAATGAGGCTGGATATTGCTGTGGATGTCAATTATTCCATCGT  
CAGCAAAGGTGGCGCTATTTTCAGGGCTGTGACAGACAAATGATCTATGACATGCTGAAGAGGCTAAAGT  
CTGTAGTTTATCTACCTGGAGATTATGTCTGCAAGAAGGGTGGAGATCGGGAGGGAGATGTACATTATC  
AAGGCAGGAGAGGTGCAGGTGCTGGGTGGTCCAGATGGGAAAACGGTCTTTGTGACTCTCCGAGCAG  
GTTCTGTGTTTGGAGAGATCAGCCTGCTGGCAGTGGGAGGGGGCAACCGGCGCACAGCCAATGTGGTG  
GCCATGGGTTCCGCAACCTGTTTATCCTGGACAAGAAGGACCTGGCCGAGATCCTTGTGCACTATCC

CGAGTCCAGAAGCTGCTGCGGAAGAAGGCCAAGAAAATGCTGACCAAAGACAAGAAACCCACGGAC  
GAGAAGGCAGAGCAGAAGACAGGCAAGAAGGCTATCCCCCTGCAGCCAGAGACACCCAAGCTGTTCC  
AGGCCGCGCTGGAGGTCACGGAAAAGTCAGGGATCAAGGGCACTTTCTCCAAGCTGAAGCAGAAGTG  
GCACAAGTCCAGCTCTGTGGAGCCCTCCAGCTCTGTGCCCGTGCCTCCCGGGTCCCCAGTGCACCGCCG  
TCCCCCATCCCACGCGAACTGCCAGAGGTGGAGGAAGAGGACATAGTGTCCCAGGCCTCGGACAGCT  
CCATGCTGATCCGGATGAGCCCCGGGCACCACGGCCGCGAGCAAGTCTGACGGTGGAGGTGTCCCCG  
AAAGAGGAAGGAGAGCCCACGGGGGAGGCAGCACCCGCGAGCAGAAGGGGATCCAAGGGAGAGGGG  
GAGTCCAAGAAGTAG

>KT749733\_CNGB1\_Bowfin\_24179-1-3+23872-1-1

ATGATCTTGGAGGAAGTGGAGTCAGACTGGGAGAATGAGCCAGGGGCCAGGCTGAGACTCTGGAGA  
TGCTCCCTGCCCCACGGGAGCCCCCTTCCACCCCTCGGCTCCGCGCCGTGCTGCTGGAGGACGCAGAG  
ACCCAGACAGAGCGCTGGACACCCATTCTACACCTGACTCCACCAGAGACAGACGGAGTCAGGCAAG  
ATCCAAAGGCAGTTCGAAGAGCCAGTGAAGAAACAGCGGAGGAGCCACTTGAGGAAGTGACAGAAA  
ACCTGGATGATGGAGAAGAATTGCACAATATCCAGGAGGAAGAGAATGAAGAAGATCCAGAGTTACG  
ATTGATACAGGAAGAAAGTGAGGAGGCGGAGGAGGAGAGAATAAGTTCACCGAGTGCCTTGTGGAC  
GTGTGTCTGTCAGGGGGCTTCCCCAGCCCCCCCCCGCTGAGTCAGTAGAGGAGGAGAAAGCTGCAGC  
AGGAGAACAGACCCACCCACAGCTGGGACCAGAGGCACGGGTGGAGGGGGATCCAGACGGAGGAGT  
GCAGAAGACAGGAGAGGTGAGCCCAGAGCAAGGGCAGTCAGCAGTCAAAGAGGATTCACCTGTCAGG  
GTGTCCGAAGCAGCGAAACAACCGTTCGCCTGTGGAGGAGGAGCCACAGGAAGTCAAGCAAGAGTCCC  
CAGTGAAAGAGCCATCCCCTGGCCAGGATCCTGAACCACAACCACAGCCAGAACCAGAACCAGTTCA  
GGATGCAGAAGCAGTCAAGGAACCTTGTGCCAGTGAGAGAGGAGTCCCCAGTGAAGGAGGTGCAACCC  
ACACCGGCCCAGAAAGGCGTGGCAGCTTGTGAGCCACAGCCTGTACACAGCAGCCAAAGAGATCAG  
AGGAGGTGTCGCCACTGCGTCTGTCAACCAGGAGGAGGAGACTGAAGCGGTTGAAGAAAATTGCGG  
AGAAGGTTCCAGAGTGAATGTACACCCTGCTGTCAATGTGGAAGATGTGGATTCAGACAAAGATTCCA  
GCGACAGTCCCAGGAAACTGCCTCTCGTCCTGCCCCCTCAGTCCCCCTACACCAGCAAGACCCTAACT  
GTGCCAGGGGTGTCTGTGGCATCCCGGAGCCGATCCCTGGAAGTAGAAAAGAAGCTGTACAACCAGG  
AGGACAGTGTGGAGGAGACTGAGACCACAGTCAGGGCCTGGCCAGTCAGAGCAGTCTGCTTATGGA  
GGATGGGGGGGAGAGAGAGGCCCGCCTCAGTCACCAGCCAGACCAGCGCCATTGTGAATGAACGGCTG  
CAGGAGCTTGTGAAGATGTTAAGGCACGGACAGAGCGAGTGAAGGAGAAGCTCGTCGACCCAGATG  
ACTCTGATGAAGAGAGCGCCACCTCCTCCCCAGTAAAGAAAGCCGCACCCCCCTCCC  
CCTCCCCCTCCCCCAGAGGAGAAAGCTGAGCCTGAGAAGAAAGAGGAGGAGGAGCACTACTGCGACA  
TGCTGTGCTGCAAGTTCAAACCATGCCCTGGATGAGGCAGCTGAAGCGGTACCACTTCCCAAAGAGC  
ATCGACCCCTTACCAATCTGATCTACGTGCTGTGGCTGTTCTTCGTCACCCCTGGCTTGGAACTGGAAT  
GTGTGGCTGATCCCGGTGCGCTGGGCCTTCCCCTACCAGACCCCTGACAACATTCACCTCTGGCTGCTC  
ACTGACTACCTGTGTGACACCATCTACATCCTGGACATCCTGGTCTTTCAGCCCCGTCTGCAGTTTGT  
CGAGGCGGGGACATCGTGTGCGACAAAAGGATATGAGAGAAAATATGAAAATCTGCGCTTCA  
AGATGGACCTCATTAGCCTTTTCCCTCTGGATTTGCTGTACATAAAAGTTGGTGTGAATCCCTCCTGA  
GATCCCTCGTTTATTGAAGTACATGTCTTTCTTTGAATTCATGAACGTCTGGAAGCAATCCTGAGCA  
AAGCCTACATCTACAGAGTCATCAGAACAACAGCTTACCTGCTCTACTCCCTACACTGCAACTCCTGCC  
TCTTCTACTGGGCGTCTGACTATGAAGGACTCGGTTCCACAAAATGGGTGTATGATGGCATCGGCAAC  
AGTTATATCCGCTGCTACTACTTTGCAGTGAAGACCCTCATCACCATTGGGGGGGCTGCCAGACCCTACC  
ACCCTGTTTCGAAATTATCTTCCAGCTGGTCAACTACTTTGTGGGAGTCTTTGCCTTCTCCATCATGATCG  
GGCAGATGAGAGATGTTGTGGGAGCCGCACTGCGGGCCAGACATACTACCGGGCCTGCATGGATAG  
CACCATCAAGTACATGACTTCTATCGCATCCCCGCGACGTCCAGAACCGAGTTAAGACCTGGTACG  
ACTATACCTGGCAGTCTCAGGGCATGTTGGATGAGCAGGAGTTGCTGGTCCAGCTCCCAGATAAGATG  
AGACTTGACATTGCTGTGGATGTCAATTACTCCATTGTCAGCAAGGTGGCACTCTTTGAAGGCTGTGAT  
AGACAGATGATTTATGACATGCTGAAGAGGCTGAAATCTGTGGTGTACCTGCCAGGGGATTACGTCTG  
TAAAAAGGGGGAGATAGGGCGGGAGATGTACATTATTAAGGCTGGGGAGGTTTCAGGTGCTGGGCGGT  
CCTGACGGGAAGACTGTCTTTGTGACGCTGCGAGCTGGGTCTGTCTTTGGGGAAATCAGCCTTCTGGCC  
GTGGGAGGAGGGAACCGACGCACAGCCAACGTGGTGGCTCACGGGTTTGCCAACCTCTTCATTCTGGA  
CAAGAAGGACCTGTCTGAGATCCTGGTGCCTACCCCGAGTCCCAGAAACTGCTACGCAAGAAGGCCA  
AGAAAATGCTGAGCAAAGACAAGAAGCCCCAAGGTGAGAAGCCGACCAGCACACAGGTTCATCCCTCC  
GCGCCAGGGACACCCAAGCTGTTCCAGGCAGCCCTGCAGGCCACAGAGAAGTCGGGCATGAAGGGA  
ACTTTCTCCACACTGAAGCAGATGGCGCACACGTCCAGCTCAGATGAGCCCTCCAGCTCCATGCCAT  
TCTTCCCGGCTCCCCAGTGCACCGCCGTCCCCAGTCCCACGTGAGCTGCCGGAGGAGGACGAGGAGG  
AGGATGTGGTGTCTGAGGCCTCTGACAGCTCCATGCTAATCCGCATGACCCCCGCCCATGACGGCCAT



GAAGAGCTCCTGTCCGTAGAGATGCCCCATACAGAGGAGGAGGCCAAGGAGTAA

>KT749734\_AMICA\_c24179\_g1\_i3

ATGATCTTGGAGGAAGTGGAGTCAGACTGGGAGAATGAGCCAGGGGCCAGGCTGAGACTCTGGAGA  
TGCTCCCTGCCCCACGGGAGCCCCCTTCCCACCCTCGGCTCCGCGCCGTGCTGCTGGAGGACGCAGAG  
ACCCAGACAGAGCGCTGGACACCCATTCTACACCTGACTCCACCAGAGACAGACGGAGTCAGGCAAG  
ATCCAAAGGCAGTCGAAGAGCCAGTGCAAGAAACAGCGGAGGAGCCACTTGAGGAAGTGACAGAAA  
ACCTGGATGATGGAGAAGAATTGCACAATATCCAGGAGGAAGAGAATGAAGAAGATCCAGAGTTACG  
ATTGATACAGGAAGAAAGTGAGGAGGCGGAGGAGGAGAATAAGTTCACCGAGTGCCTTGTGGAC  
GTGTGTCTCCTGCAGGGGGCTTCCCCAGCCCCCCCCCGCTGAGTCAGTAGAGGAGGAGAAAGCTGCAGC  
AGGAGAACAGACCCACCCACAGCTGGGACCAGAGGCACGGGTGGAGGGGGATCCAGACGGAGGAGT  
GCAGAAGACAGGAGAGGTGAGCCCAGAGCAAGGGCAGTCAGCAGTCAAAGAGGATTCACCTGTCAGG  
GTGTCCGAAGCAGCGAAACAACCGTCGCCTGTGGAGGAGGAGCCACAGGAAGTCAAGCAAGAGTCCC  
CAGTGAAAGAGCCATCCCCTGGCCAGGATCCTGAACCACAACCACAGCCAGAACCAGAACCAGTTCA  
GGATGCAGAAGCAGTCAAGGAACCTTGTGCCAGTGAGAGAGGAGTCCCCAGTGAAGGAGGTGCAACCC  
ACACCGGCCAGAAAGGCGTGGCAGCTTGTGAGCCACAGCCTGTACACAGCAGCCAAAGAGATCAG  
AGGAGGTGTCGCCACTGCGTCTGTCAACCAGGAGGAGGAGACTGAAGCGGTTGAAGAAAATTGCGG  
AGAAGGTTCCAGAGTGAATGTACACCCTGCTGTCAATGTGGAAGATGTGGATTCAGACAAAGATTCCA  
GCGACAGTCCCAGGAAACTGCCTCTCGTCCTGCCCCCTCAGTCCCCCTACACCAGCAAGACCCTAACT  
GTGCCAGGGGTGTCTGTGGCATCCCGGAGCCGATCCCTGGAAGTGAAGAAAGAGCTGTACAACCAGG  
AGGACAGTGTGGAGGAGACTGAGACCACAGTCAGGGCCTGGCCCAGTCAGAGCAGTCTGCTTATGGA  
GGATGGGGGGGAGAGAGAGGCGGCTCAGTCACCAGCCAGACCAGCGCCATTGTGAATGAACGGCTG  
CAGGAGCTTGTGAAGATGTTAAGGCACGGACAGAGCGAGTGAAGGAGAAGCTCGTCGACCCAGATG  
ACTCTGATGAAGAGAGCGCCACCTCCTCCCCAGTAAAGAAAGCCGCACCCCCCTCCCCCTCCCCCTCCC

>KT749735\_AMICA\_c23872\_g1\_i1

CCTCCCCCTCCCCAGAGGAGAAAGCTGAGCCTGAGAAGAAAGAGGAGGAGGAGCACTACTGCGACA  
TGCTGTGCTGCAAGTTCAAACCATGCCCTGGATGAGGCAGCTGAAGCGGTACCACTTCCCAAAGAGC  
ATCGACCCCTTACCAATCTGATCTACGTGCTGTGGCTGTTCTTCGTACCCCTGGCTTGGAACTGGAAT  
GTGTGGCTGATCCCGGTGCGCTGGGCCTTCCCCTACCAGACCCCTGACAACATTCACCTCTGGCTGCTC  
ACTGACTACCTGTGTGACACCATCTACATCCTGGACATCCTGGTCTTTCAGCCCCGTCTGCAGTTTGTG  
CGAGGCGGGGACATCGTGTGCGACAAAAGGATATGAGAGAAAATATGAAAATCTGCGCTTCA  
AGATGGACCTCATTAGCCTTTTCCCTCTGGATTTGCTGTACATAAAAGTTGGTGTGAATTCCCTCCTGA  
GATTCCCTCGTTTATTGAAGTACATGTCTTTCTTTGAATTCAATGAACGTCTGGAAGCAATCCTGAGCA  
AAGCCTACATCTACAGAGTCATCAGAACAACAGCTTACCTGCTCTACTCCCTACACTGCAACTCCTGCC  
TCTTCTACTGGGCGTCTGACTATGAAGGACTCGGTTCCACAAAATGGGTGTATGATGGCATCGGCAAC  
AGTTATATCCGCTGCTACTACTTTGCAGTGAAGACCCTCATCACCATTGGGGGGCTGCCAGACCCTACC  
ACCCTGTTTCGAAATTATCTTCCAGCTGGTCAACTACTTTGTGGGAGTCTTTGCCTTCTCCATCATGATCG  
GGCAGATGAGAGATGTTGTGGGAGCCGCCACTGCGGGCCAGACATACTACCGGGCCTGCATGGATAG  
CACCATCAAGTACATGACTTCCTATCGCATCCCCCGCGACGTCCAGAACCGAGTTAAGACCTGGTACG  
ACTATACCTGGCAGTCTCAGGGCATGTTGGATGAGCAGGAGTTGCTGGTCCAGCTCCCAGATAAGATG  
AGACTTGACATTGCTGTGGATGTCAATTACTCCATTGTCAGCAAGGTGGCACTCTTTGAAGGCTGTGAT  
AGACAGATGATTTATGACATGCTGAAGAGGCTGAAATCTGTGGTGTACCTGCCAGGGGATTACGTCTG  
TAAAAAGGGGGAGATAGGGCGGGAGATGTACATTATTAAGGCTGGGGAGGTTTCAGGTGCTGGGCGGT  
CCTGACGGGAAGACTGTCTTTGTGACGCTGCGAGCTGGGTCTGTCTTTGGGGAAATCAGCCTTCTGGCC  
GTGGGAGGAGGGAACCGACGCACAGCCAACGTGGTGGCTCACGGGTTTGCCAACCTCTTCATTCTGGA  
CAAGAAGGACCTGTCTGAGATCCTGGTGCCTACTACCCCGAGTCCCAGAAACTGCTACGCAAGAAGGCCA  
AGAAAATGCTGAGCAAAGACAAGAAGCCCCAAGGTGAGAAGCCGACCAGCACACAGGTTCATCCCTCC  
GCGCCCAGGGACACCCAAGCTGTTCCAGGCAGCCCTGCAGGCCACAGAGAAGTCGGGCATGAAGGGA  
ACCTTCTCCACACTGAAGCAGATGGCGCACACGTCCAGCTCAGATGAGCCCTCCAGCTCCATGCCAT  
TCCTCCCGGCTCCCCAGTGCACCCGCCGTTCCCCAGTCCCACGTGAGCTGCCGGAGGAGGACGAGGAGG  
AGGATGTGGTGTCTGAGGCTCTGACAGCTCCATGCTAATCCGCATGACCCCCGCCCATGACGGCCAT  
GAAGAGCTCCTGTCCGTAGAGATGCCCCATACAGAGGAGGAGGCCAAGGAGTAA

>KT749736\_CNGB3\_Bluespot\_ray\_35987-1-2

ATGTTTCATAAACTCGGGTTTGGATTCAGAAAAGTGACACCAAAGCAGCCAGAGCCAAAAACTGTTGA  
AATTCCAGAGGTTCGGCCAGCAATCAACAGAACAGGAATCTGAAACAGCTAAAAATGAATCCAGGAAG

ACTGAAGAAGAAGTAATGGTAGTCAAAATAGCACCAACAAACACTGAACAAGCAGTAACTTCTGAGA  
CTTCTCTTTGGAAAAATGCAACAAAGGTAACACCTTCAACTGAAGAAGCCAAGTCGCAGGAAAGAAG  
TGAAGCTATCCCTAACTTGTTACTTCGGAAGCATGAATCAAAGGACAAAGAACTGGATTTAAACAATT  
CTCTCAGTAATGAGCGTGAGCCACAAGCAACTGTACTTAAACAGTGATTATGCAGACGCACAGATGCAG  
AGTTTGGTGCAACGTATGCGGGAAAGGACATCTCTATACAAAGAAAAGTTGTTTGAACAGGATAGCAC  
TTCCTCAGATCAAACCTTACCACCCACACCAGTCAAAAAGCCACCTCCAGCAAAGGAAGTCAACGATA  
AAATGCCACCTCCGCCAGACAAAGATAAAAAGGATGAGGAGAAACCAGAGAAAGAAAAAGATGAAG  
CCAAACTTGAAGAGGAACTTGGCTGTGACATCCTTGGTTGTAAATTCAAGAGGCATTCAATCAAGAAA  
TTTGTACAGCAGCTAAAAATACCTGAAAGTATTGACACATTTTCAGATCTGCATTACATGGTATGGATC  
AGTTTTGTGGTACTTGCTTGGAACTGGAAGTGTGGTTTCAATCCCATGCGCTGGGCTTTCAATTATCAG  
GATCCACAGTTTCTCTCCATCTGGTTAACTATAGATTATCTCTGTGATTTTCATCTATCTGCTGGATATGT  
TGGTGTTCAGGTCCGCTTGCAGTTTGTGAAACAGGGAGACATAATAAGTGATAAAAATAGAAATGAGA  
AAACATTATATGAAATCATTAAAATTTAAGCTTGACCTTGCATCAATAATCCCATTGATTTGTTATAT  
TTGCTACTTGATTATAATCCCTTGTTCGACTAAATCGCCTACTTAAGTATTCAATCTTCTTTGAATTCA  
ATAATCAATTGGAGTCTGTAATGAAGAAAGCTTACATTTACAGGATTGCCCGGACAGTAGGGTATCTG  
CTTTTCTCCTGCATGTAATGCTTGTGTTGATTACTGGGCTTCAGATTTTGAAGGTATAGGCAGCAAT  
AAATGGGTCTACAATGGCAGAGGAAACAGGTACCTGAGGTGTTACTATTGGGCAGTCCGGACTTTGAT  
TACAATTGGTGGTATTCCTGAACCAGTCACTCTTTGAACTAGTCTTTCAGGGGTGCAATTATTTTAC  
AGGTGTCTTTGTGTTCTCCAGCTTACTTGGTCAGATGCGTGACATTATTGGGGCAGCTACTGCAGGCCA  
ATCATACTACCAAACATCTTTGGATAACACAGTAGCATATATGAATACATACTCAGTTTCAAGATATGT  
ACAGAATCGTGTACGTAATGGTATGAATATATTTGGGAATCACAAGGCCAGTTGGATGTATCTGAGA  
TGATGGAAGGTATGCCAGTAAAGATGCAACTGGCCATTGCAATTGATCAAACACTATGAGATAGTCAGC  
AAAGTTGATCTGTTTAAAGGAATGTGACCAGCAGATGATATATGATATGCTGCTCAGGCTGAAATCCGT  
TGTCTATTTGCCTGGTGATTTTGTATGCAAGAAGGGAGATATAGGAAAAGAAATGTTTCATCATCAAGT  
CGGGACAGGTTCAAGTGCTCGGAGGACCAGACGGTAAACAATTCTGGTGACCTTGAAGGCTGGATC  
AGTATTTGGAGAAATCAGTCTTCTAGCTGCTGGTGGAGGCAATCGACGCACTGCCAACGTGGTTTCCA  
GTGGATTCACAACTTATTTATTTTAAACAAAATAAACAATGAATGAAATTCTGGTGTACTATCCAGATT  
CCCAGAAGATCCTTAAAAAAAAGGCCAAAAAATTGTTTGCAGGAGATAAAGCCAAGAAAGCTGATGT  
CCACCAACCTGCCAACAAATGGACTGTTGTTTCTATTTTCGACAAAGACCAGATACTCCAAAATTTACCA  
TATCATGCTAGCTGCAATAAAAGAGAAAGGTTTAGATCTTCTAAGTAAATTTAAGGAAACTGAAACCA  
AGTTAAAGGTACATAACCAAATGAAGCTGGATGCAACCCTGTTGGAAGTAAAAATATAAAGAAATTT  
TCTCCACTGATAACGAGAGATTGGAAGGCAATGAATGTTCAAAAACACTGAAGAAAAGGCCAGAACAT  
GTGAATAA

>KT749737\_CNGB3\_Bamboo\_shark\_40333-1-5

ATGTTTTCTAACTATGGGTTCAAAAAGTAACACCAAAAACAGGAAGTGCTGGAAGGCATTCAAAAGGT  
TACATCTCAGCAAAAAGACCAAAAATCAAAGGAACAGGAACTAAAGTAAGAGAAAATGAGTCCTTG  
AAGGCTGAGGAAAAAGACACAGAGTTCAAGTCAGTTTCTACGAACACTCAAGCAATGTCCCAGTCTCC  
TCCGTGCTGGAATCGTACTAAAGAACCAAAGTCTCAAACAACAAATGCAACTGTCTCAAACAGGGAG  
TTGAATCAAGCTTACACATAGAACCTGCATCAATGGAAGAAGAAGTTGGACTTCACAACACCTCCTCT  
AGTGAATGCGAGCAAGAGCAACGAGTATTTCTCAGTGATAGAGCTGATGCACAGCTTCACAGCTTAGT  
GTTACGTGTGCGGGAAAGGACATCATTATACAAAGAAAAGTTGATTAGTGAGGATGGTTCTTCATCAG  
ATGAAACTCCACCAGCTTCTCCAAGCAAAAAGGCTCCTGCACCAAAAGATGATGAAGAAAAACAACA  
ACAAGAAATAAGTCATGATGAGACCAAAACCGAAGAGGCATATTACTGTGACATGGTTTGTCTTTGAAT  
TCAAGAGACTTTCAATTA AAAAGATCATT CACAAGTTAAGAATCCCTGAAAGCATTGAAAACCTCAGAT  
TGGCGCTACGTGTTGTGGTTGTTTTGGTGGCACTTGCATGGAAGTGGAGTTGCTGGTTTATTCTGTGC  
GCTGGGCGTTCAACTTTCAGACACCAGACACTCTTCCCTATTGGTTAACCATGGATTATATCTGTGATT  
TCATCTATCTACTCGATATGTTAGTATTCCAGACCCGACTACAGTTCATTAACAAGGTGACATAATAA  
ATAATAAAGAAGAAATGAAAAAATATTACATGCAATCATTGAAATTCAAGCTTGATCTGGCATCAGTA  
ATTCCATTTGATTTATTCTACTTGGTGTGTTGATTGCAATCCCCTGTTTCGACTGAATCGTTTACTTAAGT  
ATTTAGCATTCTTTGAATTTAATTATCGATTGGAGGCGATAATGGAAAAAGCCTATATATACAGAATTG  
TACGAACAACAGGATACCTGCTTTACCTCTTGCATATAAATGCTTGCATTTATTACTGGGCATCAGTGT  
ATGAAGGTATTAGCAGCACTAAATGGGTCTACAATGGCAAAGGAAATAGGTACCTGAGATGTTATTAT  
TGGGCAGTCCGCTCTTTGATCACTATTGGTGGTATTTCCGAACCAGTCACCCTCTTTGAAATAATCTTTC  
AGGGGTGCAATTATTTCATAGGTGTCTTTGTTTTCTCCAGCTTACTTGGACAGATGCGCGATATCATTG  
GCAAAGCCACTACGGAATTTAGTTATTACCAAAGTTCAATTGACAACACAATGAATTACATGAATGCA  
TATTCAGTTTCAAAATGTGTGCAAAAATCGTGTGCGTAAAGTGGTATGAATACACTTGGGAATCACAAGG

CCTGCTGGCATCATCTGAGCTATTGGAAAATTTGCCAGTAAAGATGCAACTATCAATTGCTATTGATCA  
AAACTATGCAATAGTCAGCAAAGTTGACCTGTTTAAGGAGTGTGACAAACAAATGACATATGACATGC  
TGCTCAAGCTAAAATCAGTTGTGTATTTGCCTGGTGATTTTGTATGTAAGAAGGGAGATGTAGGCAAG  
GAAATGTATATCATCAAGACAGGACAAGTCCAGGTGCTTGGTGGACCTGATGACAAAGAAGTTTTGGT  
TACCTTGAAGGCGGGATCTGTATTTGGAGAAATCAGTCTTCTGGCTGGAGTTGGAGGGAATCGGCGAA  
CTGCTAATGTGATTGCAAGTGGATTTACAAATTTATTTATTTTGGACAAGAAGACTCTGAATGAAATTC  
TTATGAATTATCCAGATTCACAAAAGGTTCTTAAAAGGAAGGCCAGAAAATTATTCCCAGTCGAAAA  
GACAAGTCTAAAAGCAAATGTAATCCTGCTAATACGTCAATATTCCTAATAAGGCCTAAGCAAGACAC  
TCCAAAATTGTTTAATATACTGTTGCTTGCAGTAAAATCCAAAGGATTGACTCTACTCAGGAGATTCTT  
GAAAATGGAAACAAAGGTTATATGA

>KT749738\_CNGB3-Partial\_Florida\_gar\_26657-2-1

ATGTTCAATAAACTAAAATCAGGCCTTGGAAAAGTAATTCCGCAGAAGTCTGAAGTCACAAAGAACCC  
AGAAGACTTGACTCAACCTGCTGCCTCTGTAGCCCCAGCACCTCCATCCACAGCAAATGCCAAGCCAG  
AAGCCCAGGAGCAGAAGCCCAAAGAAAAACAAAATGCTGCCACAAAAGAGGGCGGACCCCAAGTCAG  
CTCCCTGTGCCCCAGCTCCAGCCCCACAGGCCCCACCTTCTGAGCCCCCCCCAAAAGCCAAAGATGTC  
CTGAATTCGGAAAGGAAGGCAGAAGATCTTGCCGACAGCCCAGGCGATCCAGCTTGTGAGGAAGAGG  
TTGGTCCCTGCCTCGGTTCCCATCATCATCAACAAGTACACCGACGATCATCTCCGTGACCTGGTGAAC  
GGCTGAAGGAAAGAACAGCACTGTACAGGGAGAAAATCACAGATAAGAACGCCTCCTCTCCTGAACC  
CAGTCCCCCTCCCTCTCCACTCAAAAAGCCTCCTCCGAAAAAGGAGGAAAAGAAGGATGAAAAGAAA  
GACGAGAAGAAGGAAGAGGCTCAAGTGAAGAAGCCAAGCCAGATGAGGAGCACTACTGCAACATG  
CTGTGCTGTAAATTCAAAACCAAGGCCCTGAAGGACAAGCTGAAGAAGTGTAAAGCTGCCAGAGAGTTT  
GGATGAGTTCACAGACCGCAGGTACATCTTTTGGCTGTTTATAGTGAGCTTGGCATTCAACTACAACCTG  
CTGGTTCATCCCAGCTCGTATGGCCTTCCCCTGCCACACAGCAAAGAGCATCCCCTACTGGATCTTCTT  
CGACACGCTGTCTGACATAATTTACATCGTGGACACGCTGGTGTTCAGACGCGCATAACAATTTGTCCG  
AGGTGGTGATATCATTATGATAGAAAGGAAATCAAGAAGCATTACAGAGAGTCTGCAAGATATAGA  
ATTGACCTTATCAGTGTGTTGCCATTGACCTGCTGTGCTTTCGTTTTGGATTTAAGTCAGTATTTAGAA  
TAAATCGTTTCATGAAGCGTGAGTCATTCTTTGACTTTAATGATCGCTTGGAAAGGTATCATGAGTAAAG  
CCTATATTTACAGAGTGATACGCACCACAGGCTACCTGCTCTACATCCTGCACCTAATGCCTGTTTAT  
ACTACTATGCTTCAGACTATGAAGGTATTGGATCCACCAAGTGGGTTTACGATGGCGAAGGCAATGCG  
TACCTGCGCTGTTACTATTGGGCAGTGCGTACCCTCATCACCATTGGGGGCCTACCGGAGCCAGTCACA  
GTATTTGAGATCGTGTTCAGTTGTTGAACTATTTACAGGTGTCTTTGTGTTCTCCAGCTTGATTGGGC  
AGATGAGAGATGTCATTGGAGCTGCCACAGCAGGTACATACATATTTCCGAGCCTCTATGGATAGCACT  
GTGGCCTATATGAACACCTACAATATTTCCAAGCTGGTTCAGAACAGAGTTTCGCACCTGGTACAACCTA  
CACTTGGGCATCCCAGGGCATGCTGGATGAGTCGGAGTTGCTGGAGCAGATGCCGATGACAATGAGG  
ACAGCTATTGCCGTAGATGTGAACTTCAACAGCGTCAGCAAGATCGAGCTTTTCAAGGGATGTGATAA  
CCAGATGATTGTGGACATGCTACTCCGGCTGAAATCCATTGTGTATTTACCAGGAGACTATGTCTGCAA  
AAAGGGAGAAATCGGCCGGGAGATGTATATCATCAAGCAGGGGGAGGTCCAGGTGTTGGGGGGCCCA  
GATGGCACCAAAGTCCTGGTCACTGAGGGCCGGGGCTGTGTTTGGAGAGATCAGCCTG

>KT749739\_CNGB3\_Bowfin\_26035-1-1

ATGTTTCAGTAAACTAAAGTGGGGCCTTGGTAAAATACTTCCACAGCCAGATGATGGAAGAAAACCTGA  
GGATCCAACACCTCCAGCTGCAGAAGACCCCAAGCCAAAAGCACAGGAAGAAAAACCTAAAGAAAA  
AGAGAATGAGACAAAACAAGAGGCAAATGCACAACCACCCACCTCAGCTCACGATGCTGATCCCAAC  
AAGGAGGCCCCCAAATCTGATGAGAAACCAGCTGAACCTGCCAACAACGAGCAAGGAGCTCCATCTG  
GCCAGAAGATGCTGCCCTGCCCCAGCTCCAGCTCCTATCATCATCAATACGTTCTCAGACACCCAAC  
TGCGCATGCTGGTCCAGCGCCTCAGGCAAAGGACAGCTCAGTTCAGAGAGAACTTATAGATAAAGAT  
GCCTCTTCTCCTGAACCCAGTCCACCTACTACTCCCATCAAAAAGCCCCCAGAGAAAAAAGAAGAGAA  
AAAAGAAGAGAAGAAAGATGAGAAGAAAGATGAGAAGAAGGATGAGAAGAAAGATGATGCCAAAG  
TGGAAGAAGTCAAACCAGAGGAAGAACAATAATTGCAATATGCTCTGCTGTAAATTTAAAACCAAGCCA  
CTGAAGGACAAATTTAAGCAATACCAGCTGCCAGACAGTTTATGATGAATTTACAGACCCGACAGGTATAT  
CTTTTGGCTGTTTCGTGGTGACACTGGCATTCAACTACAACCTGCTGGTTTGTTCGATCCGCATGGTCTTC  
CCCTACCACACGGACAGAAGCATCCCCATCTGGATCTTCTTTGATTTACTTGCTGACGTCATTTACATT  
GTGGATATCCTGGTGTTCAGACTCGCTTGAATTCATCCGAGGTGGTGTATCATTACGATAAAGAA  
GAAATTAAGAAGCATTACAGATCATCTCTTAAATTTACGAATGATATTCTCAGTGTCTGCCATTTGAC  
TTACTATACCTAAAATTTGGATTTAAATCGGTGTTTCGAGTAAATCGCTTCTTAAAGCATGAGTCATTC  
TTGACTTCAATGATCGGCTGGAAAGTATAATGTCCAAAGCCTATATTTACAGAGTTATCCGTACCACA

GGCTATCTGCTCTACATCCTGCACCTCAATGCATGTTTATACTATGCGGCCTCTTTCTATGAGGGCATTG  
GCTCCACCAAATGGGTTTATGACGGCGATGGCAACGAGTACCTGCGCTGTTACTATTGGGCAGTGCCT  
ACGCTCATCACCATTGGTGGTCTTCCGGAGCCAGTGACAGTTTTTGGAGATTGTGTTTCAGTTGTTGAAC  
TATTTACGGGTGTCTTTGTCTTCTCCAGCTTGATTGGGCAGATGAGAGATGTTATTGGGGCGGCTACA  
GCAGGTCAGACATACTTCCGGGCCTCTATGGATAACACAGTGTCTTACATGAACACTTACAAGATACC  
AAGACAGGTCAGAACAGAGTGCAGCACTTGGTACAATACTTGGGATTCCCAGGGCATGCTAGATG  
AGTCCGAGTTGCTGGAGCAGATGCCAACCGTTATGCGAACAGCAATCGCCGTAGATGTGAACTTCAGC  
ACTGTCAGCAAGATTGAGCTTTTCAAGGGGTGTGACAACCAGATGCTTGTGACATGCTGCTGAGGCT  
CAAATCCATTGTGTATTTACCAGGAGACTATGTCTGCAAAAAGGGGGAAATTGGCAGGGGAGATGTACA  
TCATCAAGCAAGGCGAAGTCCAGGTGCTTGGAGGGCCAGATGGGACTAAAGTGTAGTCACACTGAG  
GACCGGGGCTGTCTTTGGAGAGATCAGTCTGCTGGCCGCCAGCGGTGGAAACAGAAGGACAGCAAAT  
GTTGTGGCCCATGGTTTCGCCAACCTGTTTCATCCTGGACAAGAAGGACCTCAATGATATCCTAGTGCAC  
TATCCAGACTCTCAGAAAGTGTGTACGGAAAGGGCAGAAAATAATGAAAGACAAGGGTAAAAAGG  
CCGGCCCCGTGGAGGAACGACAGAAAGGAAATGCCCTGTTACCACCAGGCCCCCGACCCCGAAGCT  
TTTCCGCACACTACTGAATGCCAGAGGAAAAGGCGTTTTTTGGAACTTCAAGGGTGCATCTTAG

>KT749740\_CNGBX\_G.\_australis\_58615-1-2

ATGTTTCGTCTGCTCCTCGTGGCAGCCTTTGCAGGGTTGCTCCACTCCTTACACCTGATGGGGACTCCTCA  
CCCACCCAAGCCAATGGCAAGGATGATCAAAACCCACCGAACTCGAATGCAAGTCTACGCCTGAATC  
AAAGGCTTGTGGCCAGCCCAGTGATGCTCAGGCCAGTCAAAGACATCACCTGAGGGAGCCGGGGCC  
AAGGAGGCTCCTATCCCCAACCGCCGCTGCCTTCCAGTACAGCCACTCCAGGATGTGCTCAAGAGCA  
GATCAACGATGAAAGGGAGGACAAGGAGGTGGCTGAGAAGAGCCTGGCAGATCCCTTGATGATGGAA  
CTCGATGCAGAGAGGCAGGCGCATATCCGGGACCTGGTGGAGCGTTTTTCGCTTGCATGGAACCAT  
GAAGGAGCACATCATGGACCCAGACGCCTCCTCGCCGGAGCCAAGCCCTGAGCCGTCACCTATAAAG  
AAGGCTCCAGCCCAAGCACCACCCTCCACCAGTGAAGGAAGAGGAGAAGAAGGAAGAAACCGCTC  
CAGAGGTCACTCCTGACCAACAGGAATGTGAAATGCTTTGCTGCCGGTTCAAGCAGAGGCCTTGGATG  
GAGAAGTTAAGAACTAAAGATCCCACAAACCATTGACGCATGCTCAGACAAGATATACTTGATGTG  
GCTGATGCTGGTGACACTAGCATTTCAGTGGAGCTGCTGGCTCCTGCCACTCAGGCTGTGTTTTCCGGT  
GCACACACCAAACACCATGTTTTTCTGGTACATCGGCGACTACACATGCGACGCCATCTACCTGTTTGA  
TATCCTGGTTCATGCAGAGAAGACTCCAGTTCGTCAACCGTGGAGACATTATCAAAGACCAGAAAGAAA  
CATCAAAACACTATTACCATTACAGAAAATTCAAGTCGGACCTTGTGTCTCTGCTGCCTCTGGACATTT  
TGTACCTCAAGTTCGGTCTTCTGCATTGTTCCGTCTGCCTCGCTTGGTCAAGTACAATGCATTCTTTGA  
GTTCAACGATCGCTTGGAGGCTAATCTGGACAAGGCCTACATTTACAGAGTGATCCGCACTACCGGGT  
ACCTGCTCTACAGTTTACACCTCAACGCCTGCCTTTACTACTTTGTCTCTGATATGGAGGGACTTGGCA  
GCACTCGTTGGGTGTACGATGGCAAGGGCAACAGGTATGTCCGCTGCTATTACTGGGCTGTGAAAACC  
CTCATCACCATCGGGGGCCTGCCCGAGCCAGCAACATACTAGAGATCGTCTTCCAGTTGTGTAACATA  
CTTCTTGGGCGTCTTTGTCTTCTCCATTATGATTGGACAGATGCGAGACGTAATTGGCGCGGCGACAGC  
GGGGCAGAATTACTACCGCGCGTGCATGGACAACACGCTGGGCTACATGGGCATGAACAACATCCCG  
CGCGCCATAACAGAACCGCGTGCATGTGGTACGAGTACACCTGGGCCTCCCAGGGCATGCTGGATGA  
GTCGGAGCTCCTGGACAACTGCCACCAAGATGAGGCTGGAGATCGCTATTGACGTCAACTACACTA  
TAGTCAGCAAGGTGGACCTATTCAAGGGCTGTGACCGGCAGATGATATACGACATGTTGCTCAGGCTC  
AAGTCTGTCGTCTACTTGCCTGGAGATTTTGTCTGTAAAAAGGGCGAGCTTGGGAGAGAGATGTACAT  
CATCAAGGCAGGAGAGGTGCAGGTGGTTGGAGGCCCGACAACAAGATCGTGTTTGTCACACTGAAG  
GCCGGCGCTGTGTTCCGGGAAATCAGCCTTCTGGCGGTTGGAGGTGGGAACCGCCGCACGGCCAACGT  
GATGGCGCACGGTTTTCGCAAACCTCTTCATCCTGGATAAGAGGGACTTAACCGAAATCTTACGCATCT  
ATCCTGAGTCCGAGAAGCTGCTTCGCAAGAAAGCCAAGAAACTGCTGTGCAAGACAAGAACAAGGC  
TACTGGGGATGCAGCACCTGTGGTCAGGGGTTTTGCAAGCATATTCCCGGAGAAGCCACCAACACCCA  
AATTTCTGCGTCTGATTCAAATGGCTTCTCGAAATGCAGCAAAAAACAACAATGTAA

>KT749741\_CNGBX\_M.\_mordax\_39552-1-3

ATGTTTCGTCTGCTCCTCGTGGCAGCCTTAGCAAGGTTGCTCCGATCCTCACCCAGATGAGGACTCCTCG  
TCCACCGAGGCCAACGGCAAGGATGGAACTCACCCAACTCAAGCACAAGTCCCACGCCCGAATCGA  
AGGCTTGTGACCAGCCAGTGATGCTCAGGCCAGCCAGTGATGCTCAGGCCAGTTCGAAGACATCA  
TCTGAGAGTTCAGGTGGTGGGCTGAGGAGGACCCTGACACCTGTGTTCCGCTGCCTCCCAGTGCAGC  
CACTGCTCGATCTGCTCGTGAGCAGACCCACGATGAAAGGGAGGACAAGGAGGTGGATGAGGAGGGC  
CCGGCAGATCCCTCGAATCTGAAACTCAATCCAGAGGTGGAGCAGCACATCCGGAACCTGTTGGAGCG  
ATTTCCGCACACGCACGGAAATTATGAGGGAGCACATCATGGACCCAGACGCCTCGTCCAGAGTGCA

GCCCCGAGACGTCACCTAAAAAGAAGACTCCAAGCAAGGCCGCCACCACCTCCACAAGTGAAGGAAGA  
GGCGAAGAAGGAAGAAGTAGCTCCAGAGGCCACCCTGAACAACATGAATGTAAAATGCTTTGCTGT  
CGGTTCAAGCGGAGGCCCTGGATGGAGAAGCTCAATAAACTCCGTCTCCCACAGACCATTGATCCATG  
TGCAGACAGGATATACTTGATATGGATGATGTTGGTGACACTCGCATTTCAATGGAAGTCTGGATCCT  
GCCACTCAGGCTGTCGTTTCCGATGCACACACCTGACGCCATGTTCTTCTGGTACACCGTCGACTACAC  
ATGCGACGCCATCTATCTGCTGGATATCCTGATCATGAAGCGCAGACTCCAGCTCGTCCATAAAGGAG  
ACATTATCACAGATCCGAAAGAGACAGCAAAGTTCTACTACCGTTCAAAAACGTTTAAGTGGGACCTT  
CTAGCTCTGCTGCCTCTGGACATTTTGTACTTCAAGTTTGGGCCTTCTGCAATGTTCCGTCTCTTTTCGCT  
TAATCAAGTACCACTCATTCTTGAATTCAACGCTCGCTTGGAGGCTACTATGGGCAAGCCCTACATTT  
ACAGAGTGATCCGGACTACCGGGTACCTCCTCTTTCAGTTTACACATAAACGCCTGCCTTTACTACTTCG  
TGTCCGATATGGAGGGACTGGGCAGCACCCGTTGGGTATACGATGGCAAGGGCTGGAGGTATACCCGC  
TGCTATTACTGGGCAGTGAACCCCTCATCACCATCGGGGGTCTGCCTGAGCCCAGCAACGTGTTTGA  
GATCATCTTCCAGTTGTGTAATACTTCTTGGGCGTCTTTGTCTTCTCCATTATGATTGGACAGATGCGA  
GACGTAATTGGCTCGGCGACAGCGGGGCAGAATCACTACCGCGCGTGCATGGACAGCACAAATGCAGT  
ACATGATCACGAACAAAATCCCACGCGCCGTGCAGAACCAGCGTGCATGTGGTACGAGTACACCTGG  
ACCGCCCAGGGCATGCTGGATGAGTCCGAGCTCCTGGACAACTGCCACCAAGATGAGGCTGGATAT  
CGCTATTGACGTGAACTACGACATCGTCAGCAAGGTGGACCTTTCAGGGCTGTGACCGGCAAATGA  
TATACGAGATGCTGCTGAGGCTCAAGTCTGTCTGCTACTTGGCCGGAGATTTTGTCTGTAAAAAGGGCG  
AGCTTGGGAGAGAGATGTACATCATCAAGGAAGGAGAGGTGCAGGTGGTTGGAGGCCCAACAACAA  
GATAGTGTTCGTCACACTGAAGGCTGGCTCCGTGTTTGGGGAAATCAGCCTTCTGGCAGCTGGAGGTG  
GGAACCGCCGCACGGCGAACGTGATGGCACATGGTTTCACAAACCTCTTTATCCTGGACAAGAGGGAC  
TTGACCGAAATCCTGCGCGCCTATCCCGAGTCCCAGAAGCTGCTCCGCAAGAAAGCCAAGAAACTGCT  
GGCGAAAGACAAGGTCAAGAATACTGGGAATGCAGCCCCTGTGGCCAAGGGTTTTGCAAACATCTTTG  
CAAGGAAGTCAGAGACACCCAAACTACTGCGTCTGGTTAGAATGATGAAACTCAATGAGCAAAAAGTA  
G

>KT749742\_CNGBY\_E.\_cirrhatus\_138315-3-2

ATGGCACGCACAACACCAACAGCGGCATCGGCACGCACTACACCAAAGCTGCATCGGCACGCACTA  
CACCAACACCTGCAGCAGCACACACTATATCAACAGCTGCATCAACACGCACTAAACGGGCAACTGCA  
TCAAACTTACTAAGTTACCAGCCGGATCAACCCACACTACACTGCCAGTCATATCAACCAGAATCAA  
GGTGGCTGCTGCACCTACCGGAATGAAAGAATTAACACGTACTACACCACAAGCTTCATCAATTCTTA  
ATTCCCACCTTCTGAATCAACCCGTACCACTCTCCAGGTCCCATCAACCCACACCACTCTCCCTCCAA  
AATCAATCTTACCTCTACCACTCGCCACTTCAACATACTCTGCACAATCTCTCGCATCACCTGGCACTC  
TTCAACCACCTCCTGCTTTTTTCCCGGTCCATCCATCTGCCACCTGGAAGTTCTCAGGATGGATTCTTTAA  
TCCAGCCTTTTCGCCAGACTCTCCTGTCCAGCAAGTCACCATCGTCGAACAGCCCTCTGCGAGTGTGAA  
GAGTGTGGACTCAGAGGGTGGAGTTGGTGTGATGCTGAATCAGATGGTGTCTAAATCTGATTTCATG  
CTTCACAGGGCTCCCACACTGCTCGGCACAGTCTCACAGTGCCAAGCCAGACCCACAGGCCAAACAGT  
CTGCAGGAATCAGAAGCTTCAATGAATAACAGCGAATCAAATGAAAACCTCATCATTCCGCAGTGC AAC  
TCCAGCACAGGTCACCAAGCAATTGAGCAAATTGACCCAGCGGCTACGATCTCGCACAGCTACAGTGA  
AGCAGAGAATCTTCCACTCAGATGAATCGTCCACCGAGAGCAGTGACAGCGACAGTACTGTGAAGAA  
GATAAAACCAGTGATTAAGGAAGAACCGCCAACCAACAAGCTCCTCAGGTTCCCACAGCCCCCAGC  
CTTGAAGATCCAGGGATAGATGGGGGCTCCACAAGAAGAACCTGGCACTTTCATCGACCTCACATAACC  
AGCCTCTATTGATCCTTACACAGACCACATATATGTGCTCTGGCTGTTTCTCGTGACCCTGGCATTCAA  
CTGGAACATGTGGATGGTGCCTATGCGTGC GGCTTTTCCACTGGGTGAGAATGGGCCCTGGGCCCTCT  
GGTTCACAGGAGACTATGTGAGCGATGCACTGTACTTGGGGGACATTCTGCTTCTCCAGCCACGTTTGC  
AGTTCGTACATTACGGGGATATCATTACAGACAAAAAAGAAATGAAAAAAATTATCTGCATTCACTC  
CGTTCAAGTTTGTATGTTGTATCACTATTACCTCTTGATCTGCTCTACTTTGTTGTTGGGTTCAACCCCC  
TTCTCAGGATCCCTCGTTTTTTAAAGTTCTGGACTTTCTTCGAGTTCAACGACCGGTTGGAAGCTATTCT  
TAGTAAGGCTTTTATCTACCGGGTAATTCGTACCACATGCTATCTGCTGTACACCCTCCACCTTAATGC  
ATGCCTCTACTACTGGGCCTCCAACCTACGAGGAAAATAAAGCTTCTGTTTGGACATATGATGGAGAAG  
GCAACCACTACATCCGCTGCTACTATTTTGCGGTGAAGTCTCTACTGACCATTGGTGGCCTTCCAGATC  
CCACATCTTTTTTGGAGATCTCATTCCAACCTGCTCAACTACTTCTGGGTGTCTTTGCTTTTTTCTGTCATC  
ATTGGACAGATGCGGGATGTTATAGGAGCAGCAACAGCTGCCAAAACCTCACTACCGTACTAGTATGGA  
TGGAGCATTGGCATAACATGGCCTCCTACAGTATCCCACGTGCTGTGCAGAACCAGCGTGCCTCCTGGT  
ACGAGTACACCTGGGCTTCGCAAGGCATGCTGGATGAAATGGAATTGCTGGAACAAATTCCAGCAA  
GATGCAACTGGATATCGCCATTGATGTTAACTTTGATATTGTAAGCAACGTGGAACCTTCAAGGGCTG  
TGATACTCAGATGATTTATGACATGCTTGTACGCCTGCGATCTGTGGTCTATCTCCCTGGTGACTTTGTC

TGCAAGAAGGGAGAGATAGGCCGGGAGATGTACATCATCAAATCAGGATCAGTGCAGGTGCTCGGTG  
GTCCAGACGGGCGACTCGTGCTGGTACTCTTTCGAACAGGATGCGTCTTTGGAGAAATCAGCCTGTTG  
GCAGTGGGTGGTGGGAACCGACGTACGGCAGATGTTGTAGCCCATGGTTTTACAAACCTGTTTATTCT  
GGAGAAGAAAGACCTGCACTCCATCTTGCCTATTACCCTGACTCACAGCGCCTCCTGCGAAAGAAAG  
CCAAGCGTCTCCTTTCAAAGGGCACAAAGGGACCCAAGAAGAAAGCAAAGAAGCGACCAGAACCAAT  
CATCCCCCACGGCCTCCAACCCAGTGCTCTTTTCGTGTCATGATGTCTGTGGCGAACCAATTCTGGCCT  
CCTGGGTCTGCTTATGCAGCGAGCAAAGCGTGGAGAACCAGTAGCACCTGAGGTTCTTATGGAGCCCA  
CCAAACCTCTTCATTACAATCTCCACCACCATCCCCAGTTCATCAGCATTGCGCCAGTCATCGTCGAC  
TTGAGCCACCACATGGGAACAGCGACGAGGAAGTGGTGTCCAACATGTCCGACCAATCCCTAACGATA  
CATGTGGCACACAGTTCCTCTGGGGATGATGACCAGCTCACAGTGGGTACTGGTGATGAAGGTGGACC  
AAATAAGGCCAAGGGGCCTGGTGATTAG

>KT749743\_CNGBY\_G.\_australis\_55649-1-1

ATGGTGAATCCCGTGGACCACGCTGGAGACTCGGGCCCTTCCGCGTGGCTGGCTGGGCCCCGTGGGCT  
CGCGGCCCGCCTCGTGTGGACGCTGCTGCGACGCGGCCGCGTGGGTCCGACGGCGGACGTGTGCGCCG  
GAAGCCCGCAGCCAGAGGGCCTCGCTCAGGGAGCAATCAAGAGTGCTTCTTCTGAAGATGACCGGTCC  
GCCATCGGTACCGTCAGCACTGCACAGGAACGTCAGAGCGGGGCTGGGCCTTCGCGGCCCTTCGGTCCG  
CGTGGGTACGTTGCCTGCGATGACCACGATGGGCCCCCGGGGCCCGTGGCCATGCCGGGACTGGCCT  
TCAGCACCTTCTCCTCGGCCGCATCCCCCTCAACCCAGGCCGGTGGCAGCCAGCCGTACACACCCTC  
GCGGTGCCACCGCTTCATCCAGACGCAAGTTCTCCAGTCCCACGAGCAGCGTGGACGAGGCGTCTCA  
GCACACGGGCGACGAGCAGGTGGACTTCCAGCCCAGTCCCAGCCACAGCCGCGCGGAGCCGACTCG  
CTGACGAGCCAGTGCAGCGTGTGCGGTGACGGAGCGCCTGCACGAGATCTCCCGCCAGTTCCTGTCGCG  
AACCCAGGAGGTCAAGGAGCGTATCATCGACCCCGACGAATCGCTCTCCGACACCAGCCCCCGCCT  
CTCCGGCTAAGGTCGCGCCTGTGACCCCGACACCCGCGGAAGGGGAGGCCAAGGGGGGAAGCGGGGGG  
TCAGCCGGACGGGCGAGCAACAGCAGGAGGATCTGGGATACGCGTGTACATGCTCTGCTGCAA  
CTCAAGCGGAGGCCCTGGATGCGCCGCTTTCGCGATTCCCAAAGCATCGATCCCTACACAGACCACTT  
CTACGTGCTGTGGCTGCTGCTGGTGGCGCTGGCGTTCCACTGGAAGTCTGGCTGATTCCGGTGGCGTG  
CACGTTCCCCTACGTGACGGCGGGCAATCTGGCCGCTGGCTCGCCGCCGACTACGCCTGCGACGCGG  
TCTACGTGCTGGACATGGCCTTCTTTCAGACGCGCCTGCAGTTCATCAGCAACGGCGACATCATCAGG  
ACCCCAAAGAGATGAGGAAAAACTACATGAAGTCTCAAAGGTTTAAGATGGACATGCTGTCGCTCATC  
CCACTGGACCTGCTGTACCTCCAGTTTGGGTTCAATCCCCTGTTCCGGCTCCCAGGATGCCTGAGGTAC  
ATGGCGTTCTTTCGAATTTAACGACAGGCTGGAAGCCATCCTCACTAAGGCGTTCATCTACCGGGTTATC  
CGCACGACAGGGTACCTGCTCTACAGCCTGCACCTGAACGCGTGTCTACTATTGGGCGTCCGACTAT  
GAGGGCATTGCGTCCACCAAATGGGTCTACAACGGCCTGGGCAACCACTACATCCGCTGCTACTTCTG  
GGCCATCAAGACGCTCATTACCATCGGTGGCCTTCCAGACCCCGAGAACCTCTTCGAGATCATCTTCCA  
AGGATGCAATTACTTACCAGGCGTCTTCGCATTCTCCGTTCTCATCGGTACAGTGCAGCGACGTGATCGG  
AGCGGCGACCGCCTCCAAGACTCGTACCGCGACTGCGTGGACAGTACGGTGGCGTACATGAACGCCA  
ACCGCATCCCCAAGTACGTGCAGAACCGCGTGGGACCTGGTACCAGTACACCTGGCAGGCGCTCGGC  
ATGCTGGATGAGTCGGAACCTCCTGGATCAGATGCCAGCGAAGATGCGTCTGGACATCGCGGTGGACGT  
CAATTACCAGATCATACCAACGTGCAGCTGTTCAAGGGCTGTGACAAGCAGCTGCTTCAGGATATGC  
TGGTGCCTCTCAAGTCTGTGGTCTACCTGCCTGGAGACTACGTCTGCAAGAAGGGAGAGATCGGCAAG  
GAGATGTACATCATCAAGTCTGGAGAGGTGCAGGTGCTGGGCGGCCCTAACGGCATGACGGTGGTGGT  
CACCTCAAGGCTGGCGCCGTCTTTGGCGAGATCAGCCTGCTGTGCGTTGGCGGCGGCAACCGCCGCA  
CCGCCAACGTGGTGGCGCACGGCTTTGCCAACCTGTTTCATCCTCAACAAGCAGGACCTGAACGAGATC  
CTGATCCACTACCCCGAGTCACAGCGACTGCTCCGCAAGAAGGCCAAGAACTCATGTGAGCAACAA  
GGAGAAGAAGGCCCTCCGCCGAGGAAGCCGCACACGAGGCCGCTGCTGCAGGCCAAGCAGGAGACG  
CCCAAGATCATCCGCACCATCCTGGCGGCCGCCAGGAACTCCGGACTCAGGGGAACCTTCGAGAGGCT  
GCGCAACCACATGAACAAGCCCAGCACGACGCCCGACGTGCTCCCTGCATCACTGGCTGCCAGCCCGG  
CGGCTTCTCCCGCTCCGTCTCGGGCCGCGTCCCCCCCCGACTCCCCGCCCCCAAGAGGGGTCCGGGA  
CCACGGCACCCCAACAACCACCGTAGAGGAAGACGAGGAGGATCTGTCCGAGTGGTCAGATCAGTCCA  
CGTCCAGGCCCGTGGTCCACAGGCCGGCGGAGGAGGCGTCCACACCGAGGGGCCGATCGGGGGCCCG  
CGGCCGCGAGGCGGGGGATTAG

>KT749744\_PDE6G\_E.\_cirrhatus\_60367-1-1

ATGAGCGGTGGTGGTGGAAATACTGGCTCCCACTAAAGTGACTGGTGGCCAGTAACGCCACGCAAGG  
GGCCATGCAAGTTCAAGCAGCGACAGACAGTCAATTCAAGAGCAAGCCACCAAAAAGGGGAATTCA  
AGGGTTTGGCGATGACATCCCCGGAATGGAAGGTCTTGGCACAGACATCACGGTGATTTGTCTTGGG

AAGCTTTCAGCCACCTGGA ACTCCACGAGCTTGCTCAGTTTGGAATTGTCTGA

>KT749745\_PDE6G\_G.\_australis\_31619-1-1

ATGCTCACACCGACGGCGGTGACCGACCCAACGTCACACCGGCAGCATCATCAGCTAGCATCATCATC  
AGCGGCGTCTTCAACAGCATCAGCATCATCAAAAAAAAAAGGGATCGCGACGTGAACGCTTGAAGGGG  
GTCAAAAAGGGGACCCGCGTTGGAGACATGAACTTGGCGGCTGCCAACACCTCTGGGGCGCTGATGG  
CCCCACCAAGGTGAGTGGGGGGCCCGCCACCCACGCCGGGGCCCCCAAATTCAAGCAGCGCCA  
GACGCGGCAGTTCAAGAGCAAACCGCCCAAGAAGGGGATAACAGGGGTTTCGGAGACGACATTCCTGGC  
ATGGAGGGTCTGGGCACCGACATCACCGTGATCTGCCCGTGGGAGGCGTTCAACCACCTGGAGCTTCA  
CGAGCTGGCGCAGTACGGCATCATCTGA

>KT749746\_PDE6G\_Bluespot\_ray\_30603-2-1

ATGGCAGCCAACCCCTTGGA AATTCAACCAAACCTGAAAGCACAAGAGATGGCTCTGACCCTAGAACC  
ACCGAAACCAGCGGGAGAAATTAATCAGCAACACGAGTAACTGGAGGACCAGCAACTCCTAGGAAA  
GGACCACCAAAGTTCAAGCAGAGGCAAACAAGACAGTTTAAGAGCAAGCCACCAAAGAAAGGAGTA  
CAAGGGTTTGGTGATGACATTCCTGGAATGGAAGGTTTAGGCACAGACATCACTGTCATCTGCCCTG  
GGAGGCCTTCAGTCACCTGGA ACTACACGAACTTGCACAATACGGTATCATCTGA

>KT749747\_PDE6G\_Bamboo\_shark\_28892-1-1

ATGGCAGCAAACCCCTTGGA AATTCAACCAAACCTGAAAGCACAAGAGATGGCTCTCTCTTTAGAACC  
ACCGAAACCTTTGGGGGAAATTAATCAGCCACAAGAGTAACTGGAGGACCAGCAACTCCTAGGAAA  
GGACCACCAAAGTTCAAACAAGACAGACAAGACAGTTTAAGAGCAAGCCACCAAAGAAAGGAGTA  
CAAGGGTTTGGTGATGACATTCCTGGAATGGAAGGATTAGGCACAGATATCACCGTCATATGCCCTG  
GGAGGCCTTCAATCATCTGGA ATTACACGAACTAGCACAATATGGTATCATCTGA

>KT749748\_PDE6G\_Reef\_shark\_36679-1-1

ATGGCAGCAAACCCCTTGGA AATTCAACCTAACTTGAAGCACAAGAGATGGCTCTCTCCCTAGAACC  
ACCGAAACCCGCGGGAGAAATTAAGTCAGCCACAAGGGTAACTGGAGGACCAGCAACTCCTAGGAAA  
GGACCACCAAAGTTCAAACAAGGCAAACAAGACAGTTTAAGAGCAAACCGCCAAAGAAAGGAGTA  
CAAGGGTTTGGTGATGACATTCCTGGAATGGAAGGATTAGGCACAGATATCACTGTCATCTGCCCTG  
GGAGGCCTTCAATCATCTGGA ACTACACGAACTGGCGCAATATGGTATCATCTGA

>KT749749\_PDE6G\_Florida\_gar\_30259-1-3

ATGAACCTCGAGCCCCCAAGCCAGAGATCAAGTCCGCCACCCGGGTGAGTGGCGGCCAGCTACACC  
ACGCAAGGGACCCCCCAAATTCAAGCAGAGGCAGACTCGTCAGTTCAAAGCAAGCCACCAAAGAAA  
GGAATCCAGGGATTCGGAGATGATATTCCTGGAATGGAAGGTTTGGGCACAGACATCACTGTCATCTG  
CCCCTGGGAGGCCTTCAGTCACCTGGAGCTGCACGAGCTGGCCCAGTTCGGCATCGTCTAG

>KT749750\_PDE6G\_Florida\_gar\_30259-2-2

ATGAACCTCGAGCCCCCAAGCCAGAGATCAAGTCCGCCACCCGGGTGAGTGGCGGCCAGCTACACC  
ACGCAAGGGACCCCCCAAATTCAAGCAGAGGCAGACTCGTCAGTTCAAAGCAAGCCACCAAAGAAA  
GGAATCCAGGGATTCGGAGATGATATTCCTGGAATGGAAGGTTTGGGCACAGACATCACTGTCATCTG  
CCCCTGGGAGGCCTTCAGTCACCTGGA ACTCCACGAACTGGCACAGTACGGCATCATCTGA

>KT749751\_PDE6G\_Bowfin\_23402-2-1

ATGAACCTGGAGCCCCCAAGTCCGAGGTCAAGTCAGCCACCCGAGTGACTGGTGGACCAGCCACACC  
CCGCAAGGGACCCCCCAAAGTTCAAGCAGAGGCAGACCCGCCAATTCAAAAGCAAGCCCCCAAAGAAA  
GGTGTTCAGGGATTCGGAGATGACATTCCTGGAATGGAAGGTTTGGGCACAGACATCACTGTCATCTG  
CCCCTGGGAGGCCTTCAGTCACCTGGAGCTCCATGAACTGGCACAGTATGGCATCATCTGA

>KT749752\_PDE6H\_G.\_australis\_57194-6-2

ATGAGTGAGACCCCCAACACGCTAGCCGCTCCAGAGAGTCACGTGGGCCCCACCACACCCAAGAAGG  
GCCCCCGAAATTCAAGCAGCGAGCCACGCGACAGTTTAAGAGCAAGCCTCCCAAACCTGGCGCCAA  
AGGGTTTGGGGACGATATTCAGGAATGGAAGGCTTGGGAACAGACATCACCGTCATCTGCCCTGGG  
AGGCCTTCAGCCACTTGGAACTGCACGAACTGGCGCAGTACGGGATCGTGTGA

>KT749753\_PDE6H\_M.\_mordax\_36958-1-1

ATGAGTGCGAACACCTCGAACTCCCTCGCGGCTCCGGTCAGCCACGTGGGGCCACCACCCCAAGAA  
GGTCTCTCCCAAGTTCAAGCAGCGAGCCACGCGGCAGTTTAAGAGCAAGCCTCCCAAACCTGGCGCCA  
AAGGGTTTGGGGATGATATTCCAGGAATGGAAGGCTTGGGAACAGACATCACGGTCATTTGCCCTGG  
GAGGCTTTCAGCCACTTGGAACTCCACGAACTGGCGCAGTACGGCATCGTGTGA

>KT749754\_PDE6H\_Bluespot\_ray\_36371-5-1

ATGAACGCCATCAGCGCGCCAACCAAAAACAGCTGGAGGCCACCTCCCCTAGGAAAGGCCACCAA  
AGTTCAAACAACGAGCAACCCGACAGTTCAAGAGCAAACCCCAAGGCAGGCGTGAAAGGGTTTGG  
CGATGATATTCCCGGGATGGAGGGACTCGGCACAGATATTACTGTGATTTGCCCTGGGAAGCTTTCA  
GCCACTTGGAGCTTACGAGCTGGCTCAATATGGGATCGTCTGA

>KT749755\_PDE6H\_Bamboo\_shark\_56213-1-1

ATGAATATTTACCAACCAATATTTCTGGAGGTGCCATGTCCCCAAGGAAGGGGCCACCAAAGTTCAA  
GCAAAGAGCGACTCGACAGTTCAAGAGCAAACCCCAAGGCAGGCGTGAAAGGGTTTGGAGATGAT  
ATTCCTGGAATGGAGGGGCTTGGCACAGATATCACTGTGATCTGTCTTGGGAGGCATTCAGCCACTT  
GGAGCTGCATGAACTGGCTCAGTATGGTATCGTTTGA

>KT749756\_PDE6H\_Reef\_shark\_2117-1-1

ATGAGTGCAATCACTCCACCAACCAACACATCCAGAGGTCCCATCTCTCCGAGAAAGGCACCACCAA  
GTTCAAACAAGAGCAACTCGACAGTTCAAGAGTAAGCCTCCAAAGGCTGGAGTGAAAGGGTTTGGGA  
GATGATATCCCGGGAATGGAGGGTCTCGGCACAGATATCACTGTGATCTGTCTTGGGAGGCATTTAG  
CCACTTGGAGCTGCACGAGCTGGCCAGTACGGTATTGTCTGA

>KT749757\_PDE6H1\_Bowfin\_22156-1-1

ATGAACATCACTACAAACACCTCCAACCCACCACCCCAACCATGTCACCGGGGGGGCCACAACCTCC  
AAGGAAGGGACCTCCCAAATTCAGCAAAGGCAGACCCGACAGTTCAAGAGCAAGCCCCAAAGAAA  
GGAATTAAGGGATTTGGTGATGACATTCCTGGAATGGAGGGTCTGGGAACAGATATTACGGTCATCTG  
CCCCTGGGAAGCATTACGCCATTTGGAGCTACATGAGCTGGCACAGTTTGAATCATCTGA

>KT749758\_PDE6H2\_Bowfin\_598-1-1

ATGAACGCCAGCCCCAGCAGGCAGCGCCCTGTCTGCCCTGCCCCATTGAAGCTGGGGCCACCC  
CAAGAAGGGCCCCCAAATTCAAACAAGGCAGACCAGGCAGTTCAAGAGCAAGCCCCCAAGAAG  
GGCATCAAGGGATTTGGGGATGACATTCCAGGAATGGAGGGTCTTGGCACAGACATCACTGTGATCTG  
CCCCTGGGAGGCGTTCAGCCACCTGGAGCTGCACGAGCTGGCTCAGTTCGGCATCGTCTAA

>KT749759\_PDE6I\_Florida\_gar\_30259-1-1

ATGAACATTTCTGTCAACCCCACTACCCCAACCAAGGTGACCGGGGGACCCACCACTCCCCGGAAAGG  
CCCCCAAGTTCAAGCAGAGGCAGACGCGGCAGTTCAAGAGCAAGCCCCCAAGAAGGGAGTAAAA  
GGTTTCGGAGATGACATCCCGGAATGGAGGGCCTGGGAACAGACATCACGGTCATCTGCCCTGGG  
AGGCCTTCAGTCACCTGGAGCTGCACGAGCTGGCCAGTTCGGCATCGTCTAG

>KT749760\_PDE6I\_Florida\_gar\_30259-1-4

ATGAACATTTCTGTCAACCCCACTACCCCAACCAAGGTGACCGGGGGACCCACCACTCCCCGGAAAGG  
CCCCCAAGTTCAAGCAGAGGCAGACGCGGCAGTTCAAGAGCAAGCCCCCAAGAAGGGAGTGAAG  
GGCTTTGGTGATGATATTCTGGGATGGAGGGACTGGGAACTGATATCACGGTCATCTGCCCTGGGA  
GGCATTACGCCATCTGGAGCTGCACGAGCTGGCGCAATTCGGCATCATCTGA

>KU748578\_HSP90\_G.\_australis\_53735-1-1

ATGCCTGGAGAAACAACCTGGCCCGACCATGGATGAAGAGACCGAGACCTTTGCCTTCCAGGCGGAAA  
TCGCCAGTTGATGTCCCTAATCATTAACACCTTCTACTCTAACAAGGAAATCTTCCCTTAGGGAGCTCA  
TCTCCAACAGCTCTGATGCTCTCGATAAGATCCGCTATGAGAGTCTGACAGACCCGAGCAAATGGAC  
TCTGGCAAGGAGCTCAAGATCGACGTGATCCCCAACAGAAATGAGCGCACACTCACCATCAACGACA  
CGGGCATTGGTATGACCAAGGCTGATCTCATCAACAACCTGGGCACCATCGCCAAGTCGGGCACCAAG  
GCCTTCATGGAGGCACTGCAAGCGGGGGCCGACATCTCCATGATTGGCCAGTTTGGTGTGGGCTTCTA  
CTCGGCCTACCTGGTTCGCCGAACGGGTGTCTGTCTCGTACCAAACACAACGATGACGAGCAGTACCTGT  
GGGAGTCGTCCGCGGGGGGCTCCTTACGGTGCCTTGACAGTGGTGAAAGCATTGGCAGGGGGCACT  
AAGATCGTGCTGCACCTGAAGGAGGACCAGTCTGAATACCTGGAGGAGAAGCGCATCAAAGACATCG



TCAAGAAGCACTCTCAGTTCATCGGGTATCCCATCACCCCTCTTCGTGGAGAAGGAACGTGACAAGGAG  
GTGAGTGACGATGAGGCTGAGGAGGAGAAGGAAGAAAAGAAAGAGGAAGAAAAGGAGGCCGAGAC  
GGAGGATGACAAGCCCAAGATTGAGGACGTTGGCTCCGATGACGAGGCTGACAAGGAGGGTGAGAAG  
GACAAGAAGAAGAAAAGAAGATCAAGGAGAAGTACGTGACAAGGAGGAGCTCAACAAGACCAAG  
CCCCTGTGGACGCGCAACCCAGACGACATCACGCAGGAGGAGTACGGAGAGTTCTACAAGAGTCTCA  
CTAACGATTGGGAGGATCACTTGGCCGTCAAGCACTTCTCCGTGGAGGGCCAGCTCGAGTTCCGGGCC  
CTGCTGTTTGTGCCACGTGCTGCGCCCTTCGACCTCTTCGAGAACAAGAAAAAAGAACAACATCAA  
GTTGTACGTGCGCCGTGTCTTCATCATGGACAACTGCGAAGACCTCATCCCGGAGTACCTCAACTTCAT  
CAAAGGTGTGGTGGACTCAGAAGACCTCCCCCTGAACATCTCGCGAGAGATGCTCCAGCAGAGCAAG  
ATCCTCAAGGTCATCCGCAAGAACATCGTGAAGAAGTGCATGGAGCTGTTTACAGGCCTTGCCGAAGA  
CAAAGAAAATTACAAGAAGTTCTACGAGCAGTTCTCCAAGAACATGAAGCTGGGAATCCATGAGGAC  
TCGCAGAATCGCAAGCGTCTGTCTGAAATGCTCCGGTACCACACGTCGGTGACGGGCGAGGATGTGTG  
CTCCCTCAAGGAGTACGTGTCTCGCATGAAGGAGAACCAGAAGCACATCTACTACATCACTGGTGAGT  
CCAAAGAACAGGTGTGCAACTCTGCGTTTGTGGAGCGTGTGCGGAAGCGGGGCCCTCGAGGTGGTCTAC  
ATGACTGAGCCCATCGACGAGTACTGCGTGCAGCAGCTCAAGGAGTTTGACGGCAAACGCTCGTCTC  
GGTCACCAAGGAGGGGCTGGAGCTGCCTGAGGATGAGGACGATAAGAAAAAGCAGGAAGAGGCCAA  
AGCAAAATATGAAAACCTGTGCAAGGTGGTCAAGGAGATCCTGGACAAGAAGGTGGAGAAGGTGACC  
GTTTCCAACCGGCTGGTGGCGTCTCCATGCTGCATCGTGACCAGCACCTACGGCTGGACGGCCAACAT  
GGAGCGAATCATGAAGGCGCAGGCTCTTCGTGACTCCTCCACCATGGGCTACATGGCCGCCAAGAAGC  
ACCTAGAGATCAATCCCGAACACCCCATAGTGGAGACTCTGCGCCAGAAGGCGGAGGCGGACAAGAA  
TGACAAGTCTGTCAAGGACCTCATCATCTGCTCTTCGAGACGGCGCTGCTGTCTTCGGGCTTCTCGCT  
CGATGACCCTCAGACGCACTCCAACCGCATCTACCCGCATGATCAAGCTGGGGCTTGGTATTGATGATG  
ACGAACCCATAACCAGATGAGACCACGCCATCTGTGCGCCGAGGAGATGCCACCCTGGAAGGAGATGA  
TGCTACCCGGATGGAAGAGGTTGATTAA

>KU748579\_EMC7\_G.\_australis\_51617-1-1

CTGGCGGGCGCCGTCGCCTCGTCCTCATCCGTCGCGTCCTCCTCGTCCGTCTCCTTCATCGAGGCGGAG  
GACGCGAATGGGGAGCGATTCAAGATCGAGGGCCGCGTGTCCGTGCTCGGGCTCAAGGTGCCGGAGT  
GGGTGTGCGGGCGCGCAGGTGCTGGTGGAGGGCGGCGAGTACTCGGGGCTGCTCAGAACGGATGGAAG  
CTTCACCGTGCACAATGTCCCCTCCGGCTCCTACGTTGTAGAGGTGGCTTCCCCCTCTTCAAGTTTGAT  
CCTGTACGAGTTGACATCACTTCGAAGGGAAAAATCAGGGCACGGAACTAAATTACATCAAGAGCTC  
CGAGGTGGTGCCGCTGCCTTATCCACTGCGGGTGCATCCTTGGGATCGCCAACTACTTCATGAAAC  
GCGAGACGTGGAAATGGACTGACTTCTTCAACCCAATGGTGTCTCATGATGGCTCTGCCTTTGCTCA  
TTGTATTCTCCTGCCCCAAGTTATGAACACCAATGACCCGGAAATGCGAAAGGAAATGGAGCAATCT  
ATGAACATGCTGACACCAAACAAGATCTTCCCGATGTGTCCGAACTTATGACGCGCATATTTACCAC  
GAAGAAGCCTGTAAAGAGCAGCAGCAGTACAAAAGTCAGTAAGCCGGGGCCGGTTAAGAGGAGATAG

>KU748580\_G6PI\_G.\_australis\_43341-1-1

ATGGCCGGGCTGACGAGCGACCCTGCGTGGAAGCGACTGGGCGAGTGGCACGGTAAACACTCGGCCT  
CTCTCAAGATGAGGCAGCTATTCGACAAGGACCCGGAACGTTTCGCCAAATTCAGCCTGCTGCTCAAT  
ACCGATGGCGGAGAGCTGCTGCTGGACTACTCAAAGAACCTCATCACGCCGGAGGTCATGGGCCTGCT  
GCTCGACCTGGCACGTTCCCGTGGAAATTGAAAAGGCCCGAGACCGCATGTTTCAGCGGGGAGAAGATTA  
ACTTCACCGAGAACCGCGCGGTGCTGCACGTGGCTCTGCGCAACCGCTCCAACAAGCCCATGGTGGTG  
GACGGCAAGGACGTGATGCCCGACGTCAACGCTGTGCTGGACAAGATGCGTGGTTTTCTGCGAGAGGGT  
GCGGAGTGGACAGTGGAAAGGGCTACTCGGGCAAGGCCATCACCGACGTGGTGAACATCGGCATCGGC  
GGCTCCGACCTGGGCCCCCTGATGGTGACCGAGGCGTTGAAGCCGTAICTGAAGGGGCGGCCCAACTC  
GTGGTTTCGTGTCGAACATCGACGGCACGCACATGGCCAAGACGCTCGCCGTCCTCGACCCTGAGACGA  
CGTCTTCATCATCGCGTCAAAGACGTTACGACCCAGGAAACGATCACCAACGCAGAGTCGGCCAAA  
GAGTGGTTCTGAAGAAAGCCGGAGACCCTGCGGCAGTTGCGAAGCACTTTGTGGCGCTCTCCACAAA  
CGGGGCAAAGTGAAAGCTTTTGGCATCGACACCAACAACATGTTTCGAGTTCTGGGATTGGGTTGGAG  
GTCGATACTCACTGTGGTTCGGCGATCGGCCTCTCCATCGCCCTGCACATTGGCTTTGACAACCTTTGAGC  
AGCTGCTCAGTGGAGCTCACTGGATGGACAACCACTTCTGCAGCGCGCCGCTGGAGAAGAACGCGCCT  
GTTCTCCTGGCGCTGCTGGGCGTGTGGTACGGAACTTCTACAACGCCGAGACGCACGCGCTGCTGCC  
CTACGACCAGTACATGCACCGCTTCGCCGCCTACTTCCAGCAGGGTGACATGGAGTCCAACGGGAAGT  
ACATCACGAGCTCGGGCCGTCGCGTGCAGTACAGCACGGGCCCATCGTGTGGGGCGAGCCGGGCACC  
AACGGGCAGCACGCTTCTACCAGCTCATCCACCAAGGAACCCGCATGATCCCGGCGGACTTCCTCAT  
CCCGGCGCAAACCCAGCACCCCATCCGCGACGGGCTGCACCACACGATTTTGCTGGCGAACTTCCTGG

CGCAGACGGAGGCGCTGATGAAGGGGAAGACGACGGAGGAGGCGCGCGGCGAGCTGCAGGCCGCG  
GCCTCAAGGGCGACGCGCTCGACAAGCTGCTCCCTCACAAGGTGTTTCGAGGGGAACCGCCCGACAAAT  
TCGATCGTCTTCGACAAGCTCACGCCCTTCATGCTGGGGGCCCTGATAGCCATGTACGAGCACAAGAT  
CTTCATCCAGGGCGTCATCTGGGAAGTGAACAGCTACGACCAGTGGGGGGTGGAGTTGGGCAAGCAG  
CTGGCCAAGGCCATCGAGCCGGAGCTCAGCTCGTCGGGAGAGGTGACCTCGCACGACTCCTCCACCAA  
CGGGCTCATCGGCTTCATCAAGCAGCACCGGCAGTGA

>KU748581\_SNRPD3\_G.\_australis\_90835-1-1

ATGTCGATCGGCGTGCCCATCAAGGTTCTTCACGAGGCCGAGGGCCACATCGTGACCTGCGAGACGAA  
CACGGGCGAGGTGTACCGCGGCAAGCTGGTGGAGGCCGAGGACAACATGAACTGTCAGATCTCAAAC  
GTGACTGTGACGTTCCGGGATGGGCGCGTGGCCAGCTTGAGCACGTGTACATTCGCGGCAGCAAAAT  
CCGCTTCCTCATATTACCAGACATGCTCAAGAACGCGCCCATGTTAAAGTCTGTCAAAAACAAAAACC  
CTTCAGCAGGAGCCGGACGTGGAAAGGCAGCTATCCTCAAAGCACAAGTGGCACGAGGCCGAGGTCG  
TGGTGGCTTCAGTCGTGGAAACATCTTCCAGAAACGACGATAG
