# Supplementary material for: Evolution of Vertebrate Phototransduction: Cascade Activation
Source: PubMed Central journal article supplement — Mol Biol Evol. 2016 May 11;33(8):2064–87. doi: 10.1093/molbev/msw095 (PMC4948711; doi:10.1093/molbev/msw095), 2016-05-11
Supplement: supp_msw095_File_2_Protein_sequences_fasta.pdf [file supp_msw095_File_2_Protein_sequences_fasta.pdf]

>KT749668\_Rh1\_E.\_cirrhatus\_142849-3-2

MNGTEGSNFYVPM SNKTGVVRS PFLYPQFYLAEPWKYSALAA YMFFLIVTGFPVNFLTLFVTIQHKKLR TAILNYILLNLATANLLMIVFGFTTTMYSSMNGYFVFGTTMCFYEGFFATFGGEMALWSLVVLAVERYIVICKPMGNFRFGTSHALIGVSFTWIMALSCCAPPIFGWSRYIPEGMQCSCGPDYYTLNPKYNNFSFVIYMFTVHFSIP LTIIFFCYGRLLCAVKEAAAQQESATTQKAEKEVTRMVVIMVVGFLICWLPYASVAA YIFTHQGADFGAIFMTIPSFPAKSSALYNPVIYIFM NKQFRQCMVTTLFCGKNPFEDDESGTSQTKTEVSSVSTTQVSPA\*

>KT749669\_Rh1\_G.\_australis\_59018-4-1+5-3

MNGTEGQNFYIPFSNKTGVARS PFEPQYYLAEPWKFSALAA YMFFLILVGFPVNFLTLFVTVQHKKLRTP LNYILLNLAVSNLFMILFGFTTTMYTSMNGYFVFGPTMCSIEGFFATLGGEVSLWSLVVLAIER YIVICKPMGNFRFGNTHAIMGVALTWVMALSCAAPLLGWSRYLPEGMQCSCGPDYYTMNPTYNNESFVIYMFIVHFTI PFVVIIFSYGRLLCTVKEAAAQQESASTQKAEKEVTRMVVLMVVGFLVCWVPYASVAFYIFTNQGSDFGA TFMTLPAFFAKSSALYNPVIYILMNKQFRNCMITTLCCGKNPLGDDDSGASTSKTEVSSVSTS QVAPA\*

>KT749670\_GEOAU\_c59018\_g4\_i1

MNGTEGQNFYIPFSNKTGVARS PFEPQYYLAEPWKFSALAA YMFFLILVGFPVNFLTLFVTVQHKKLRTP LNYILLNLAVSNLFMILFGFTTTMYTSMNGYFVFGPTMCSIEGFFATLGG

>KT749671\_GEOAU\_c59018\_g5\_i3

ATLGGEVSLWSLVVLAIER YIVICKPMGNFRFGNTHAIMGVALTWVMALSCAAPLLGWSRYLPEGMQCS CGPDYYTMNPTYNNESFVIYMFIVHFTI PFVVIIFSYGRLLCTVKEAAAQQESASTQKAEKEVTRMVVLMV VGFLVCWVPYASVAFYIFTNQGSDFGATFMTLPAFFAKSSALYNPVIYILMNKQFRNCMITTLCCGKNPLG DDDSGASTSKTEVSSVSTS QVAPA\*

>KT749672\_Rh1-Partial\_M.\_mordax\_25773-1-1

CGPDYYTMNPDFNNE SFVIYMFVVHFVIPFVIIFFSYGRLLCTVKEAAAQQESASTQKAEKEVTRMVVLM VVGFLVCWVPYASVAFYIFTNQGSDFGATFMTAPAFFAKSSSLYNPVIYILMNKQFRNCMITTLCCGKNPL GDDDSGASTSKTEVSSVSTS QVSPA\*

>KT749673\_Rh2\_G.\_australis\_51485-1-2

MNGTEGANFYIPFHNRTGVVRS PYEYPQYYLADPWMYSAISAYMFTLILIGFPINFM TLFVTFKHKKLRQPL NFILVNL CVADLLMIMFGFTTTFYTAMNGYFVFGPTGCNIEGFFATLGGEVSLWSLVVLAIER YIVVCKPMGNFRFATTHAALGVVFTWVMASACAVPPLVGWSRYIPEGMQCSCGPDYYTLNPKYNNESYVIYLFVHFLLPVTIIFFTYGRLLCTVKEAAAQQESASTQKAEKEVTRMVVIMVVGFLVCWVPYASFAFYLFMNK GILFSATAMTVPAFFSKSSALYNPIIYVLLNKQFRTCMVTTLFCGKNPFGEDDSSMVSTSKTEVSSVSSSQVSPS\*

>KT749674\_SWS2\_G.\_australis\_38136-2-1+1-1

MYQ GKSTQVDDLPEDFYIPIALNVKNMSELSPFLVPQVHLGDSFIFYGMSAFMLFLVLAGFPLNFLT V FVTI KYKKLRSHLNYILVNLAIANLIVVCCGSTLAFYSFMHKYFILGPLFCKMEGFTATLGGMLSLWSLAVLAFE RCLVICKPFGNIAFRGTHALIGCGFAWAAIAASTPPLFGWSRYIPEGLQCSCGPDWYTTNNKYNNESYVM FLFIFCFGTPFTIIIIVSYSKLILTLRAAAAQQESASTQKAEKEVSRMVVIMVGGFLVCWLPYASLALWIVFN RGSPFDLRLATIPSVFSKASTVYNPVIYIFLNKQFRSCMMKTIFCGKNPLGDDEDATSTTTQVSSVSTS QVAPA\*

>KT749675\_GEOAU\_c38136\_g2\_i1

MYQ GKSTQVDDLPEDFYIPIALNVKNMSELSPFLVPQVHLGDSFIFYGMSAFMLFLVLAGFPLNFLT V FVTI KYKKLRSHLNYILVNLAIANLIVVCCGSTLAFYSFMHKYFILGPLFCKMEGFTATLGGMLSLWSLAVLAFE RCLVICKPFGNIAFRGTHALIGCGFAWAAIAASTPPLFGWSRYIPEGLQCSCGPDWYTTNNKYNNESYVM FLFIFCFGTPFTIIIIVSYSKLILTLRAAAAQQESAS

>KT749676\_GEOAU\_c38136\_g1\_i1

QESASTQKAEKEVSRMVVIMVGGFLVCWLPYASLALWIVFN RGSPFDLRLATIPSVFSKASTVYNPVIYIFLNKQFRSCMMKTIFCGKNPLGDDEDATSTTTQVSSVSTS QVAPA\*

>KT749677\_SWS1\_G.\_australis\_43779-1-4

MSGDEEFYLFKNISKVGPWDG PQFHIAPKWAFYLQA AFMGFVFICGTPLNAIVLVVTIKYKKLRQPLNYILV NISAAGLVFCLFSISTVFVASM QGYFFLGPTICALEAFFGSLAGLV TGWSLAF LAERYIVICKPFGNFRFGSK

HALVAVGLTWMLGLSVALPPFFGWSRYIPEGLQCSCGPDWYTVGTYKSEYYTYFLFVFCFVVPLSIIIFS  
YGSLLGTLRAVAAQQQESASTQKAEREVSRMVIMMVASFCTCYVPYAALAVYMTNRDHNIDLRFVTVPA  
FFSKASCVYNPLIYSFMNKQFRACILETVCGKPITDESETSSSRTEVSSVSTSQVSPG\*

>KT749678\_LWS\_M.\_mordax\_38189-1-1

MAASWERAMFSARRRHDEDTTRESVFVYTNNENFTRDPFEGPNYHIAPRWIFNLVSVFMLIVVVASLFTNG  
LVLVATMKFKLRHPLNWILVNLAFAEDIAETIFASTVSVSNQVFGYFILGHPMC VFEGYIVALCGICGLWSL  
AIISFERWMVVKPFNGVDFDKIALILIFSFWWA AFWCAPPIFGWSRYWPHGLKTSCGPDVFSGNSDPGV  
QSYMVTLMITCCFIPLSVIIICYFQVWLAHTVAQQQKESETTQKAERDVSRMVVVMIMAYIFCWGPYTAFA  
CFAANPGYAFHPLVAALPSYFAKSATIYNPIIYVFMNRQFRNCILQLFGKKVDDGSEVSSTSRTTEVSSVSNS  
SVSPE\*

>KT749679\_LWS\_G.\_australis\_59018-5-4

MAQSWERAMFAARRRQDEDTTKGDLFRYTNENNTRDPFEGPNYHIAPRWMYNLTSFWMIIIVVILSLFTNG  
LVLVATLKFKKLRHPLNWILVNLAIAIDIGETIFASTVSVVNQIFGYFILGHPLCVFEGFTVSVCGITALWSLAI  
ISFERWMVVKPFNGVDFDKVAIVLIIFSWAWSAGWCAPPIFGWSRYWPHGLKTSCGPDVFSGSTDPGVQ  
SYMVTLMITCCFIPLALIIICYLQVWLAHTVAQQQKESETTQKAERDVSRMVVVMIFAYIFCWGPYTFAC  
FAANPGYAFHPLAAALPAYFAKSATIYNPIIYVFMNRQFRNCIMQLFGKKVDDGSEVSSSARTEVSSVSNS  
SVSPA\*

>KT749680\_Parapinopsin\_G.\_australis\_53253-1-3

MSILASNTSDVAHLHG VANVSGALTPMTRVPDAEASC GGGGLAASEGHAGVNFHALSALMGITSVLSIVL  
NGLVIAVTLRSKLLRQPLNYALVNLAACADLGISLGGIITTVSNARGRFDLGRAVCVADGFLVAVFGMTALI  
TVCVLAVERYVVVCKPLGGVHFNTQHIGICGVAFSWAWALLWSMPPLFGWGRYHFEGVGTSCAPDWSDS  
STSGRSYMTAYFTFCFTLPLMIIVFCYTKLMRAIHKVSKLGLSANDTAERKVGMMVVMIFAFFLCWLPYA  
ALAIATVIKPKDLKVSPLTASIPVYMAKSSSAYNPIIYIFMHRQFREHISRMCCGQRNQSSRITPEENTMQRLQP  
A\*

>KT749681\_Parapinopsin\_G.\_australis\_53253-2-1

MDSNTSIIIGGGNGSVLLEPSSATPSRAV FVLSVIMGITTFASLLNGLVVVASLRHKELRQPLNTSLLSLA  
AADLGMALAGGLPNTVTNAVGGVMGRAGCITEGFLMSFFGIAALDSVCVLSVERYVVVCRPLGSLRFTP  
RHAALGLAVAWLWALAWTVPPLMGWGRYGPEGVGTSCAPDWADESAAGRAYILCFLVFCFALQLLIIFC  
YGRLLMMLHQA PKLSGGASQRAERQV GIMVVMVLAFLVSWTPYAVCSIAVAVTPGLKLSPLLATVPLYA  
AKSSTAYNPVIYIILNRNFRSILRQMICGKAAGETRAESEAVTRVETLRGPEEGGDKGGRSDEAAPQATSSV\*

>KT749682\_VAL\_G.\_australis\_53322-1-2

MEDNPLLDSPGSLHHGVPSALPSAPGGGGTGPAGGGGGGGVTVVPHDPFARPLDGIAPWNFTLLAALMGT  
ITALSLGENFAVILVTVRFRQLRQPLNYVLVNLAADLLVSAVGGSVSFFTNLKGYFFLGVQACVLEGFAV  
TYFGVVALWSLALLAFERYFVICRPLGNFRLQAKHAGLGLAVVWIFSLACTLPPVLGWSSYRPSMIGTTCE  
PNWYSGDMHDHTFIMMFFTTCFIFPLTVIFVSYGKLIQKLLKASETQRGLESTRRAEQVTRMVVVMILAF  
LFCWMPYATFSIVVTACPSIHIDPLLA AVPAFFSKTATVYNPVIYVFMNKQFRDCFLQVLPCGGLKKSSVTQ  
TAGARNTTEHTASVDRLSPGGRHRISLAAAAAAGGPKFTSAVAPGPATGIVEPTLAVAASVESLASKSAAPY  
QHRQQQQPEGGQYQGPSNPAITHVQPLLTRAESVNKIYPV\*

>KT749683\_VAL-Partial\_M.\_mordax\_32621-1-1

PLAGIAPWNFTMLAALMGIITLSLGENFAVILVTARFRQLRQPLNYVLVNLAADLLVSAIGGSVSFFTNL  
KGYFFLGVHACVLEGFAV TYFGVVALWSLALLAFERYFVICRPMGNFRLHAKHAALGLAVVWLFSLACTL  
PPVLGWSSYRPSMIGTTCEPNWYSGELHDHTFIVMFLTTCFIFPLAVIFVSYGKLIQKLLKASEMQRGLESTR  
RAEQVTRMVVVMILAF LICWTPYATFSIVVTACPSIHIDPLLA AVPAFFSKTATVYNPVIYIFMNKQFRDCF  
MQVLPCGSFKKVA VMQTA AAHNTASARPHSPTNRHSISLAAGRPKFTGAVAPGPTTGVEPTMAVADAM  
DGPKNLSEALYQQEEGHQEQQDELSIPPITHVQPLLDHVESANKIHPV\*

>KT749684\_Parietopsin\_G.\_australis\_49194-1-1

MQEQSSSSTALAVFGATPPGSTPPGPTIFPPAGYTVLATLMFLNASFSIVNNALVIAITCRYP SLRNPLNALILS  
MSVSDLLMSLFGTTVA AVTNLHGSLRHIGHAGCVFQGFTVNYFGCVSLWSLTLAYERRLVVTHGCSLRG  
GWSRARRGLAFVWTFCLVWAVAPLLGWSAYGPEGVQTSCSLAWERRSLSNYTYLVGYFLSCFAVPVSIIF  
SYGNVLC SLHTLNKKIERVGGHRDPREEVRAAVMVLAMVGA FMACWLPYTLALCVVLAPGTHIPLVA

TLPMYFAKTSPIYNPIIYFFLNRQFRVCAVEFVTCGAVRLNEPDGDGGSVSLAPTPPPGATELPAPPPPPPPRR  
NQVSPA\*

>KT749685\_OPN3\_G.\_australis\_57727-1-4

MPSAVALRGELVNVTAPVLLRVPSEGPADRTGPFSPGTYTALALLVGTVAVLGVCCNALLLALFVKFKRLQ  
TPSNLLVANMSLSDDLGSLSGSGTLGACMGHGWHWGPLACMWDGFANTLFLGLVLSIGSLSVLAWERCAR  
VLATSDSRPCDLAWSLRAALATWMYALAWASPPVVGWNHYSLEAHGLGCSVDWRSRARRVDCIYTGFLFL  
FCLTGPVMLMTYCYGSILLAVHRFRKLEALQAPQVVKARRFELQLSAVCLLMMLLFLLCWAPYAVASLLV  
ASGLENVLSPPVSVVPALLAKSNAV CNPLLFLMSGNFCRCLRTLFFTLRWRAHEGRVGMCPPGAAQQHL  
DPVRPKKKVTFSSNSIVFIIASSDDGDHDLDPALGEEEEVEEEVEEEDNVEGEAEEGVVKEVTDSCVLQV  
EPD\*

>KT749686\_GNAT1\_E.\_cirrhatus\_138744-1-2

MMGSGASAEDKDQARHSKELEKQLQEDGEKDARTVKLLLLGAGESGKSTIVKQMKIIHKEGYSKEECLEFI  
TIIYSNTLQSILAIVKAMSTLNIDYGDTSCQDDSRQLYNLADSIIEGAMPQELYLIKRLWLDAGIQACFERAS  
EYHLNDSAHYYLSDLDRLVEPGYIPTEQDVLRSRVKTGTGIIETQFGLKDLNFRMFDVGGQRSERKKWIHCF  
EGVTCIIFCAALSAYDMVLIEDDEVNRMHESLHLFNSICNHRYFITTSIVLFLNKKDLFEDKVKKAHLSICFPE  
YDGSNTYEDAGNYIKLQFLDLNLRKDIKEIYSHMTCATDTKNVKFVFDAVTDIIKENLKDCGLF\*

>KT749687\_GNAT1\_G.\_australis\_56192-4-1

MGSGASAEDKDQAKHSKELEKLAEDAEDARTVKLLLLGAGESGKSTIVKQMKIIHQDGYSVEECMEFI  
AIIYSNTLQSILAIVRAMGTLSDIFGDSARMDDSRQLHNLADSIDEGTMPNELYLIKRLWTDSGIQVCFDRA  
SEYQLNDSASYYLNDIDRLVQPGYLPTEQDVLRSRVKTGTGIIETQFSFKDLHFRMFDVGGQRSERKKWIHCF  
EGVTCIIFCAALSAYDMVLVEDDEVNRMHESLHLFNSICNHRYFNATSIVLFLNKKDLFEKVKKAHLSICF  
PEYDGSNTYDDAGNYIKLQFLDLNMRKESKEIYSHMTCATDTKNVKFVFDAVTDIIKENLKDCGLF\*

>KT749688\_GNAT1\_Reef\_shark\_36724-1-1

MGAGASAEKHSRDLEKKLKEDAEDARTVKLLLLGAGESGKSTIVKQMKIIHQDGYSREECLEFISIIYSN  
TLQSMMAIVKAMTTLNIGYGDSARQDDSRKLMHLADTIDEGTMPNELYEIISRLWKDSGIQACFERASEYQ  
LNSAGYYLNDLDRIVQPGYLPTEQDVLRSRVKTGTGIIETQFGFKDLNFRMFDVGGQRSERKKWIHCFEGV  
TCIIFIAALSAYDMVLVEDDEVNRMHESLHLFNSICNHRYFIATSIVLFLNKKDVFQEKIKKTHLSICFPDYDG  
NNSMEDAGAYIKAQFLELNMRRDVKEIYSHMTCATDTENVKVFVFDAVTDIIKENLKDCGLF\*

>KT749689\_GNAT1\_Bluespot\_ray\_34616-1-1

MGAGASAEKHSRELEKKLKEDAEDARTVKLLLLGAGESGKSTIVKQMKIIHQDGYSREECLEFIAIIYSN  
TLQSMMAIVKAMNTLNIGYGDSGRQDDSRKLIHLADTIEEGTMPKELYEIIISRLWKDSGIQACFERASEYQ  
LNSAGYYLNDLDRIVQPGYLPTEQDVLRSRVKTGTGIIETQFGFKDLNFRMFDVGGQRSERKKWIHCFEGV  
TCIIFIAALSAYDMVLVEDDEVNRMHESLHLFNSICNHRYFIATSIVLFLNKKDVFQEKIKKTHLSICFPDYDG  
NNSMEDAGNYIKAQFLELNMRRDVKEIYSHMTCATDTENVKVFVFDAVTDIIKENLKDCGLF\*

>KT749690\_GNAT1\_Florida\_gar\_23900-1-1

MGAGASAEKHSRELEKKLKEDADKDARTVKLLLLGAGESGKSTIVKQMKIIHKDGYSLEECLEFIVIIYSN  
TLQSIMAIKAMNTLNISYGDGRQDDARKLMHLADTIEEGTMPKEMSDIIQRLWKDSGIQACFDRASEYQ  
LNSAGYYLNDLERLVTPGYVPTEQDVLRSRVKTGTGIIETQFSFKDLNFRMFDVGGQRSERKKWIHCFEGV  
TCIIFIAALSAYDMVLVEDDEVNRMHESLHLFNSICNHRYFATTSIVLFLNKKDVFIEKIKKAHLSMCFPDYD  
GPNTYEDAGNYIKLQFLELNMRRDIKEIYSHMTCATDTENVKVFVFDAVTDIIKENLKDCGLF\*

>KT749691\_GNAT1\_Bowfin\_36439-1-1

MGAGASAEKHSRELEKKLKEDADKDARTVKLLLLGAGESGKSTIVKQMKIIHKDGYSLEECMEFVVIYS  
NTLQSIMAIKAMTTLNIGYGDTARQDDARKLMHLADTIEEGSMPKEMSEIIRLWKDSGIQACFDRASEYQ  
LNSAGYYLNDLERLIQPGYIPTEQDVLRSRVKTGTGIIETQFSFKDLHFRMFDVGGQRSERKKWIHCFEGV  
TCIIFIAALSAYDMVLVEDDEVNRMHESLHLFNSICNHRYFATTSIVLFLNKKDVFIEKIKKAHLSMCFPDYD  
PNTYEDAGNYIKLQFLDLNLRDIKEIYSHMTCATDTENVKVFVFDAVTDIIKENLKDCGLF\*

>KT749692\_GNAT2\_Reef\_shark\_47854-2-1

MGSGASTEDKELAKRSKELEKQLQEDAEEKARTVKLLLLGAGESGKSTIVKQMKIIHQDGYTKEECLAFIS  
VINGNILQSILAIIRAMSTIGIDYGDAANA EAGRQLFNLADSIIEGTMPKELVDVVKLWTDSGVQACFERA

AEYQLNDSASYLDNLDRLITAPDYIPNEQDVLRSRVKTTGIIIEEQFSCQDLHFRMFDVGGQRSEKRWIHC  
EGVTCIIFCGALSAYDMVLVEDDEVNRMHESLHLFNSICNHRIFAATSIVLFLNKKDLFQEKIQKVHLSICFP  
DYDGSNTYDDASNYIKNQFLDLNMRKDVKEIYSHMTCATDTQNVKVFVDAVKDIIKENLKDCGLF\*

>KT749693\_GNAT2\_Bluespot\_ray\_36933-1-1

MGSGASAEDKELAKRSKELEKKLQEDAEKEARTVKLLLLGAGESGKSTIVKQMKIIHQDGYTKEECLAFISI  
INGNILQSILAIVRAMSTLGIDYGNTANADAGRQLFNLADSIIEGTMPKELVDVIKLLWDDAGIQACFERAA  
EYQLNDSASYLNNLDRLITAPGFIPNEQDVLRSRVKTTGIIIEEQFSCQDLNFRMFDVGGQRSEKRWIHC  
GVTCIIFCGALSAYDMVLVEDDEVNRMHESLHLFNSICNHRIFAATSIVLFLNKKDLFEEKIKKVHLSICFPD  
YDGPNTYEDAGNYIKVQFLDLNMRKDVKEIYAHMTCATDTQNVKVFVDAVKDIIKENLKDCGLF\*

>KT749694\_GNAT2\_Florida\_gar\_20924-1-1

MGSGASAEDKELAKRSKELEKKLQEDADKESKTVKLLLLGAGESGKSTIVKQMKIIHQDGYSEQECLEFRA  
IYGNILQSIVAIIRAMSTLGIDYGEPSKAEDGQKLFNLADSIIEGTMPAELVTVIKLLWKDSGVQACFERAA  
EYQLNDSAAAYLNNLDRLITAPNYLPNEQDVLRSRVKTTGIIIEEQFSKDVHFRMFDVGGQRSEKRWIHC  
EGVTCIIFCGALSAYDMVLVEDDEVNRMHESLHLFNSICNHKFFAATSIVLFLNKKDLFLEKVKKVHLSICF  
PDYDGPNTFEDAGNYIKNQFLDLNMRKDVKEIYSHMTCATDTQNVKVFVDAVTDIII

>KT749695\_GNATX\_G.\_australis\_56192-3-1

MGSGASAEDKESAKRSKELEKLAEDAEMEARTVKLLLLGAGESGKSTIVKQMKIIHKDGYSEAECLEFRA  
IYSNTLQSILAIVRAMETFSIDYGDSARAADGRQLINLADSLIEGSMPELADIILRLWKDSGVQASFDRA  
EYQLNDSAAAYLNNLDRLMMPNYLPNEQDVLRSRVKTTGIIEDSFCFKDLQFRMFDVGGQRSEKRWIHC  
FEGVTCIIFCGALSAYDMVLVEDDEVNRMHESLHLFNSICNHRIFAATSIVLFLNKKDLFSEKVKKVHLSICF  
PDYDGPNTFEDAGNYIKNQFLDLNLRKESKEIYSHLTCATDTQNVKVFVDAVTDIIKENLKDCGLF\*

>KT749696\_GNATX\_M.\_mordax\_40420-1-2

MGSGASAEDKESAKRSKELEKKAEDAIEARTVKLLLLGAGESGKSTIVKQMKIIHKDGYSEAECLEFRSII  
YGNTLQSILAIVRAMDTLVIDYGEPTRAADGRQLFNLADSLIEGTMPKELSDIIVRLWADSGIQACLRAAE  
YQLNDSAAAYLNSLDRLIQPNYLPTEQDVLRSRVKTTGIIEDAFSFKDLQFRMFDVGGQRSEKRWIHC  
GVTCIIFCGALSAYDMVLVEDDEVNRMHESLHLFNSICNHRIFIVTSIVLFLNKKDLFEDKVKKVHLSICFPD  
YDGPNTYEDAGNYIKSQFLDLNLRKESKEIYSHLTCATDTQNVKVFVDAVTDIIKENLKDCGLF\*

>KT749697\_PDE6A\_Bamboo\_shark\_44500-12-1

MSATKEEVEKFLDNSPNFAKEYYDTRLRAIHIANMLGSQEPNRDYSTFREVENTVEESEIIFELIRDMQDINME  
KTVFNILRRITFLIQADCMSLFMYRSRNGTPELATRLFNQKDSVFEDCFVTPDCEIVFPLDTGIIGYVAHTK  
KTVNIKDKDKDEHFCDFVDTLLEYKTNVLA TPIMNGKDVVA VVMAVNKITGSHFTTKDEEILLKYLNFLN  
LTLKIYHLNYLHGCETRKGQVLLWSASKVFEELTDIERQFHKALYTVRAFLNCDRYSVALLDMTKEKEFFD  
LWPVQMGEVPPYDGPRTPDGREINFYKIIDYILHGKEEIKVIPNPPPDHWALVSGLPSYVAETSLICNIMNAA  
ADEFFEFQKEPLDSLGTIKNVLSMPIVNKKEEIVGVATFYNRKDGKPFDEMDETLMALQFLGWSVLNT  
DTYDKMNKLENRKDIAQDMVNYHVKCSKDEIQDILKTRECFDREPDECEEDLQEILAEELPDAEEAELYE  
FHFCDFEWSPLDLVKCGIQMYEYELGVVDKHFHPQAVLVRFIYSLSKGYRKITYHNWRHGFNVGHTMFALL  
MTGNLKRYYTDLEALAMVTA AFCHDIDHRGTNNLYQMKSQDPLAKLHGSSIMERHHLEFSKTLQDEDL  
NIFQNLNRRQYEHVHLMDIAIIATDLALYFKKRTMFQKIVDLSETYEDDEEWVQFMILETTRKEIIMAMM  
MTACDLSAITKPWEVQSKVALLVAAEFWEQGDLERTVLEQQPIPMMDRINKADELPKLQVGFIDFVCTFVY  
KEFTRFHSEIQPMLSGILNNRKEWKALADEHEAKVKAIEEEKQRKEEERAQKQANDVSQKAQGSQSKTCN  
LL\*

>KT749698\_PDE6A\_Bluespot\_ray\_36960-2-1

MSMSKEDVEKFLDNNPTFAKEYYDLKLRPLHIANLLGTQETTIDCSTFRELNVEESEIIFELIRDMQDINM  
EKVVFNTLRRIAFLIQADRLSLFMYRSRNGTPELATRLFNQKDSVFEDCFVPPECEIVFPLDTGIIGYVAQT  
KKTVNIHDKSQDSHFSDFVDALTEYETKNVLA TPIMNGKDVVA VVMAINKVDSPTYFTTKDEEILLRYLNFL  
NLTLKIYHLNYLHNCETRKGQVLLWSASKVFEELTDIERQFHKALYTVRGFLNCDRYSVALLDMTKEKEFF  
DLWPVQMGEVPEYDGPRTPDGREINFYKIIDYILHGKEEIKVIPNPPADHWALVSGLPSYVAETSLICNIMNA  
AADEFFEFQKEPLDNLGWTIKNVLSMPIVNKKEEIVGVATFYNRKDGKPFDDMETLMALQFLGWSVL  
NTDYDKMNKLENRKDIAQDMVNHVHVKCSKDEIQDILKTREIYEREPNECDEEDLQEILLEELPDAEEAEL  
YEFHFCDFEWSPLDLVKCGIQMYEYELGVVDKHFVPEVLRVRFMYSLSKGYRKITYHNWRHGFNVGHTMF  
TLLTTGNLKSYYTDLEAFAMVTA AFCHDIDHRGTNNLYQMKSQDPLAKLHGSSIMERHHLEFSKTLQDE

DLNIFQNLNRRQYEHVLHLMEIAIATDLALYFKKRTMFQKIVDLSETYENFEEWVQFMILQTTRKEIIMAM  
MMTACDLSAITKPWEIQSKVALSVAAEFWEQGDLERTVLEQQPIPMMDRINKADELPKLQVGFIDFVCTFV  
YKEFTRFHSEIEPMLRGILNRRKEWKALADEHEAKVKAIEEEKKKKKEEQAAKQAAIASQKEQSSQSSSTCQ  
LL\*

>KT749699\_PDE6A\_Reef\_shark\_56278-10-1

MSATKEEVEKFLDSNPFAFAKEYYDSRLRSLHVANLLGSQQTSIDVETHRKVNCVVEESEIIFELVRDLQDVN  
MEKTLFNLRRITFLLQADRMSLFLYRSRNGTPELATRLFNQKIDSTFEDCFVQPDCEIVFPLDTGIIGYVAQT  
KKTINVHDKRTDDRFCDFVDVLTEYETRNVLATPILNGKDLVAVIMAINKIDGDHFTTTDEDILLKYVNFNL  
LTLKIYYLNYLHGCETRKGQVLLWSASKVFEELTDIERQFHKALYTVRAFLNCDRYSVALLDMTKEKEFFD  
LWPVQMGEVPPYDGPRTPDGREINFYKIIDYILHGKEEIKVIPSPADHWALVSGLPYVAETSLICNIMHAA  
ADEFFQFQKEPLDALGWTIKNVLSMPIVNKKEEIVGVATFYNRKDGKPFDEMDETLMEALTQFLGWSVLN  
TDYDKMNKLENRKDIAQDMVHYHVKCSKDEIQDILKTREIYDREPDDCEEEDLQEILLEELPDAVEAELY  
EFHFCDFEWSPLDLVKCGIQMYEYELGVVDKHFHIPQAVLVRFMYSLSKGYRKITYHNWRHGFNVGHTMFTL  
LTTGNLKRYITDLEALAMVTAAFCHDIDHRGTNNLYQMKSQDPLAKLHGSSIMERHHLEFSKTLLEDEDL  
NIYQNLNRRQYEHVFLMDIAIATDLALYFKKRTMFQKIVDLSETYENDEEWVQFMILETTRKEIIMAMM  
MTACDLSAITKPWEVQSKVALSVAAEFWEQGDLERTVLEQQPIPMMDRINKADELPKLQVGFIDFVCTFVY  
KEFTRFHSEIQPMLSGILNRRKEWKALADVHEAKVKAIEEEKQKKEEELAAKQANDVSQKAQGSQSKTCL  
LL\*

>KT749700\_PDE6A\_Florida\_gar\_28213-2-3

MAVVNAEVAEKFLDSNPVFAKKYYDNKLRPAAIASLLSCKTMQVDFSSFHELTSVEESEIVFDLIRDIQENL  
QMEKSVFNLMRHLSFLLTADRMSLFMFRMRNGTGELATRLFNVHKDATLEQCLVPPDSEIVYPLDTGIVG  
YVATSKKTINVPDVTQNSNFSDFVDQLTDYKTKNILATPILNGKDMVAVMMAVNKVGAPHFTAKDQETL  
MKYLNFGNLLRIFHLSYLHNCETRRGQVLLWSASKVFEELTDIERQFHKALYTVRAFLNCDRYSVGLLDM  
TKTKEFFDLWPVLMGEVPPYSGPKTPDGREIVFYKVIDYILHGKEDIKVIPNPPADHWALVSGLPYVAETG  
LICNIMNAAADDVFKFQKEPLDESGWVKNVLSMPIVNKKEEIVGVATFYNRKDGKPFDEMDETLMESLA  
QFLGWSVLNTDYDKMNKLENRKDIFQDMVLYHVKCRKDELQLILKTQEVYGREPQDCEEDELFAILEEE  
LPDPEESEIYEFHFCDFDHSELVLCGISMYYELGVVDKHFHIPQEALVKFMYSVSKGYRRITYHNWRHGF  
NVGQTMFTLLMTGDLKRYITDLEAMAMVTAAGFCHDIDHRGTNNLYQMKSNGNPLAKLHGSSILERHHLEF  
GKTLRDEDLNIYQNLNRRQHEHVIHLMDIAIATDLALYFKKRAMFQKIVDQSKTYDDWDKWTEYMMLE  
TTRKEIVMAMMMTACDLSAIAKPWEIQSKVALSVAAEFWEQGDLERTVLQQNPIPMMDRINKADELPKLQ  
CGFIDFVCSFVYKEFSRFHVEITPMLERLLNRRKEWKALQEEHEGKLAKLEEEKKKKEAEVAAAAAAKQA  
SKPQAESKTCVIN\*

>KT749701\_PDE6A\_Bowfin\_16830-1-2

MAVVNPDVAEKFLDSNPFAKQYYDSKFRPAVIAKLLSSRKTEVDFSSFHDLNSVEESEIMFDLIRDIHENL  
QMEKSIFNLMKNLSFLLRADRMSLFMYRMRNGTAELATRIFNVHKDAVLEECLVQPDSEIVYPLDTGIVGH  
VATSKRTVNVPDVTQNSYFSDFDVQLTDYKTKSILATPILNGKDMVAVMMAVNKIGAPHFPAKDEQTLM  
KYLNFANLILRVFHLSYLHNCETRRGQVLLWSASKVFEELTDIERQFHKALYTVRAFLNCDRYSVGLLDMT  
KTKEFFDLWPILMGEVAPYDGPKTPDGREIIFYKVIDYILHGKEDIKVIPNPPADHWALVSGLPYVAENGLI  
CNIMNAAADDFFEFQKEPLDESGWMIKNVLSMPIVNKKEEIVGVATFYNRKDGKPFDDMDETLMESLTQF  
LGWSVLNTDYDRMNKLENRKDIFQDMVLYHVKCRKDEIQNILKTKEVYGREPHECEEDELFEILEEELPD  
SESEIFEHFCDFDHSELELVKCGIAMYYELGVVDKHFHIPQEALVRFMYSVSKGYRKITYHNWRHGFNVG  
QTMFSLMTGDLKRYITDLEAMAMVTAAGFCHDIDHRGTNNLYQMKSNGNPLAKLHGSSILERHHLEFGKTL  
LRDEDLNIYQNLNRRQHDHVIHLMDIAIATDLALYFKKRAMFQKIVDQSKTYESWTEWTDYMKLETTRK  
EIVMAMMMTACDLSAIAKPWEIQSKVALSVAAEFWEQGDLERTVLEQNPIMMDRINKADDLPKLQCGFID  
FVCSFVYKEFSRFHTEITPMLERLLNRRKEWKALQEIHEAKVAKIEEEKKKKKEEQAAAAAAAKEASKAQTQ  
TKTCVIN\*

>KT749702\_PDE6B\_Reef\_shark\_56278-9-1

MNREAAEQFLDSNPDFVKQYFAKKLSPEVVAQITEQTDSAHMFTTFQEIGQVEESEILFDLVCDMQESVNME  
KVVFKILRRLSFLIHADRMSLFMYRQRNGTGELATRLFNHVKDAVMEDCLVHPDHEIVFPLDIGIVGSVALS  
KKMINVQNVTESTTYSTFADELTEYQTKCILATPIMNGKEVAVIMATNKLDGPFYFTEEDEDLFSKYLNFA  
TLNLKIYHLSYLHNCETRRGQVLLWSANKVFEELTDIERQFHKALYTVRAYLNCERYSVGLLDMTKQKEF  
FDLWPVLMGEVPPYQGPRTPDGREIVFHKIIDYILHGKEEIKVIPSPADHWALVSGLPYVAETGLICNIMN  
AAADETFTFQTEPLDSFGWTIKNVLSMPIVNKKEEIVGIATFYNRKDGKPFDEMDEVLMESLTQFLGWSVL

NTDTYDKMNKLENRKDIAQGMVLYHVKCSNNEIQNILPTRELFQKEPNECEEEDELQEILSQQLPRAEDFNL  
YEFSDLEHTEMDLVRGCIQMYEYLKVVNKFHIPREVLVRFVYSLSKGYRKITYHNWRHGFNVGQTMFT  
LLMTGKCLKRYTDLTETMAMVTAGLCHDIDHRGTNNLYQMKSQHPLAKLHGSSIMERHHLEFSKTLADE  
GLNIFQNLNRRQYEHVFLMDIAIIATDLALYFKKRTMFQKIVDLSKTYEDETAWVDYMSLETTKKEIVMA  
MMMTGCDLSAIAKPWEVQSKVALLVAAEFWEQGDLETLVQQNPIMMDRINKADELPKLQVGFIDFVCT  
FVYKEFSRFHEAITPMLDGLNRRKEWKQLADEHEEKVKAIQEEKERQLQEMEAQAAAAAASAEKAQSK  
TCCVC\*

>KT749703\_PDE6B\_Bluespot\_ray\_35760-5-1

MNKEDVAKFLDANPAFTKQYFEKCLRPEVVAQMLPRTDSTADITTFREISQVEEGEILFDLIRDMQESINME  
KVVFKTLRRVSYLIHADRMFLMYRQRNGIGELATRLFNHDKDAEMEDCFVHPDHEIVFPLDMGIVGNVAQ  
TKKTVNIPNVAESSFYSSFVDLTYETKSVLATPIMNGKDVVAVIMATNKTGDSHFTEDEDEDLFLKYLNF  
ASLNLKIYHLSYLHNCETRRGQVLLWSANKVFEELTDIERQFHKALYTVRAYLNCERYSVALLDMTKKKE  
FFDLWPEQMGEVPPYQGPRTPDGREIIFHKIIDYILHGKKEIKVIPTPPADHWALVSGLPITYVAETGLICNIMN  
AAADETFSFQTEPLDSFGWTIKNVLSMPIVNKKEEIVGIATFYNRKDGKPFDEMDEVLMESLTQFLGWSVL  
NTDTYDKMNKLEHRKDIAQGMVLYHVKCSKDEIQDILPTRECFGKEPNECEEEELQELLDQQLPPPEQFDL  
YEFSDLEFAEMDLVRGCIQMYEYLKVVNKFHIPREVLVRFIYSLSKGYRRITYHNWRHGFNVGQTMFTL  
LMTGKCLKRYTDLTETLAMLTAGLCHDIDHRGTNNLYQMKSQHPLAKLHGSSIMERHHLEFSKTLADETL  
NIFQNLNRRQYEHVLRMLDIAIIATDLALYFKKRTMFQKIVDLCQTYEDEKVVVEYMSLENTKKEIVMAM  
MMTACDLSAITKPWEVQSKVALLVAAEFWEQGDLETLVQQNPIMMDRINKADDLPKLQVGFIDFVCTF  
VYKEFSRFHEAITPMLNGLLNNRKEWKVLAEEHEMKVKALEEARQKKAEELEAKKAAAAAAAAAEKAQS  
KSCCVL\*

>KT749704\_PDE6B\_Florida\_gar\_28213-1-1

MSVTQEDVEKFLDGNPDFTKHYFDKCLKPGTISAILGQTQVQVDFTSFKELSQVEESEILFELIRDMQESINM  
EKVVFKTLRRISFLIHADRCSLFMYRQRNGIAELATRLFNVNKDAVMEDCLVQPDSEIVFPLDIGVGNVAQ  
SKKTINVKDVSQCSQYSPFVDDLTDYKTRNILATPIMNGKDVVAVIMAVNKIDGPYFTEDEDEDLFLKYLNF  
ASLNLKIYHLNYLHNCETRRGQVLLWSANKVFEELTDIERQFHKALYTVRAYLNCDRYSVGLLDMTKEKE  
FFDVWPVLMGEVPPYSGPVTDPGREIIFYKVIDYILHGKKEIKVIPNPPADHWALVSGLPITYVAESGFICNIM  
NATSEDMFKFQAGPLDESGWTIKNVLSLPIVNKKEEIVGVATFYNRKDGKPFDEQDETITESLTQFLGWSVL  
NTDTYDKMNKLENRKDIAQDMVLYHVKCRNDEIQNILKTREYVYGKEPADCDEEELSYILKKELPDPRKFEI  
YEFSDFDCTEELVKCGIKMYEYEVGVVKKFQIPQEVLVRFMYSVSKGYRKITYHNWRHGFNVGQTMFT  
LLTTGKCLKRYTDLTLEVMAMITAAFLHDIDHRGTNNLYQMKSQNPLAKLHGSSILERHHLEFGKFLSEESL  
NIYQNLNRRQIEHVIHLMDIAIIATDLALYFKKRTMFQKIVDLSKTYENEKEWVDFLSLETTRKEIVMAMM  
MTACDLSAITKPWEVQSKVALSVAAEFWEQGDLETLVQQNPIMMDRINKAAELPKLQCGFIDFVCSFVY  
KEFSRFHDAITPMYDGLMNNRKEWKARADEYEAKMKAIEEEKKRKEEEAAAAAKKAASANPSGGSQSK  
TCSVS\*

>KT749705\_PDE6B\_Bowfin\_25775-2-1

MSVTKEDVEKFLDGNPQFAKGYFDKCLKRPGAIAAVLGRQEPLVDFASFRELSQVEESEILFELIRDMQESIN  
MEKVVFKTLKRISFLIHADRCSLFMYRQRNGVAELATRLFNVNKDAIMEDCLVSPDCEIVFPLDMGVVGYV  
AQTKKTINIKDVKESSHFSFVDDLTYKTNNILATPIMNGKDVVAVIMALNKIDAPHFTDEDEDLFLKYLNF  
FASLNLKIYHLSYLHNCETRRGQVLLWSANKVFEELTDIERQFHKALYTVRAYLNCDRYSVGLLDMTKEK  
EFFDVWPVLMGEVPPYTGPVTDPGREIIFYKVIDYILHGKEDIKVIPSPADHWALASGLPITYVAESGFICNI  
MNAASDEMFKFQKEPLDSSGWTIKNVLSMPIVNKKEEIVGVATFYNRKDGKPFDEQDETIMESLTQFLGWS  
VLNTDTYDKMNKLENRKDIAQDMVLYHVKCRNDEIQNILKTREYVYGKEPAECEEEELGEILKKELPGKTKF  
EIYEFSDFDCTEELVKCGIQMYEYEVGVVKKFQIPQEVLVRFMYSVSKGYRKITYHNWRHGFNVGQTM  
FTLLTTGKCLKRYTDLTLEVLAMITAAFLHDIDHRGTNNLYQMKSQNPLAKLHGSSILERHHLEFGKFLSEES  
LNIYQNLNRRQIDHVIHLMDIAIIATDLALYFKKRTMFQKIVDLSKTYEDEKKWVDYLSLETTRKEIVMAM  
MMTACDLSAITKPWEVQSKVALSVAAEFWEQGDLETLVQQNPIMMDRINKSAELPKLQCGFIDFVCAFV  
YKEFSRFHEAITPMLDGLMNNRKEWKARADEYDAKMKAIEEEKKKKEEAAAAMQANANAKGASQSKT  
CSIS\*

>KT749706\_PDE6C\_G.\_australis\_58598-2-1

MASLNKDDVAQYLEANLEFAREFFDRKIRPEVVAKLLTPLKSAAGGDAKAPLLLSLSEAARLQEAQFLVEL  
MRDTASSIVADAPQAAPPAAALASVAIASQTPGKPSMEMVFFSLLQRLVGLSGAERGSYFIYRQRNGVGE  
VVTRFLDVKPESRVGQCLVPPSGEVVMPIDMGIVSWVVQTKKPCNAADVTKDKHFCDFVDKQTGFQTKSI

LCLPVFHGKEVIAVVNLVNKTGGFSSSEDEQLLVNYLDLASLCIKTEHLNLYNVEARRAQCLLWSANKVFEELTDIERQFHKAMYTVRGYLQCERFSVGLLDMTKGKEFFDEWPIKLGVEPEYKGPKTPDGREVIFYKIIDYILIGKEEIKVIPTPPIDHWSLVSGLPVYVAENGFICNMMNAQADDFFTFQKGPVDDTSWEIKNVLSLPIVNKKEIIVGIATFYNRCDGKPFDESDEMEMEGLTQFLGWSVLTTDTYDKMNHLENRKAIAATEMLMVHNKCTSDELQKVLKTREKKSKEVADCSDELKQVLMADLPDVAMELYEFHFSDLPVTELDLVRGGIRLFCELGVIEKFKIPADVLVRWMYTVHKGYPITYHNWRHGFNVGQTMFTLLMTGRLKKYYSDLEAFAMLTAAFCHDIDHRGTNNLYQMKSASPLARLHGSSILERHHLEFSRSLTYEDINIFQNLNKRQLETVNHLMEIAIIATDLALYFKKRTMFQNIIVTACEAMATEQEIQYVTADPTKKEIIMAMMMTACDLSAITKPWEVQSQVALLVANEFWEQGLDEREVLQQQPIPMMDRKNKSEELPKLQVGFIDFVCTYVYKEFTRFHKEIKPMLDGLLNNRVEWKARGDIYDEKMKAIIEEEKQRVEAAKTNGHTGTETA VEKSKSCVLL\*

>KT749707\_PDE6C-Partial\_M.\_mordax\_41637-1-1

AKAGGRATPMEEAFFCMLQRIVALSGAERGSYFIYRQRNGVGEVVTRFMDVKVDSCEACVVDPWSEIVIPLDMGIVSRVHVKAMVVVNDVSDKHFCNFVDLQTGLETRNLLCVPVSHGTEVIAVVNLLNKPQGFDRNDQKLVSDYMNIAASLCLKTQHLNSLYNVEARRAQALLWSANKVFEELTDIERQFHKAMYTVRGYVQCERFSVGLLDMTKGKEFFDEWPIRLGDVPPYKGPKTPDGREVNIFYKIIDYILIGKEEIKVIPTPPTDHWTLVSGLPVYVAENGFICNMMNARADEYFNFKGAVDDTGWEILNVLSLPIVNKKEEIVGVATFFNRCDGKPFDESDEIILESLTQFLGWSVLTTDTYDKMNTSLENRKEIATEMLMIHNLCSADELQEVLRSQLADKAVNDCTEELKEMLLSDLPDARSTNLYEFHFSLEVSQDLVRSQVRLFLELDIIEKFKIPIDVLVRWMYTVSKGYRSITYHNWRHGFNVGQTMFTLLMTGRLKKYYSDLEAFAMLTAAFCHDIDHRGTNNLYQMKSASPLARLHGSSILERHHLEFSRSLTYEEINIFQNLNKRQVETVNRLMEISIIATDLALYFKKRTMFQNIIVTACESMETESERIKYITSDPTKKEIIMAMMMTACDLSAITKPWEVQSQVALLVANEFWEQGLDEREVLQQQPIPMMDRKNKSEELPKLQVGFIDFVCTFVYKEFTRFHKEIRPMLDGLLNNRVHWKARAEAYDLKMKALAEQEQQEAKRSGEAKANGMPATTAVEKSKTCVLL\*

>KT749708\_PDE6C\_Bamboo\_shark\_44818-1-2

MANMGGVNKEAVEQYLENNPQFAKEYFDRKLRPETISAIENGAKVELGVRASFKDLSKLEESDIIFELVKELQNSDNVEKQIHKILQRIVSLVADRGSFLTFRSRNGIAELATRLFNVTDRDSSFENNLVLPQGEIVFPLDIGVVGWTVKTKKIQNIPDVTKDVFHSEFVDKQGTGYTTSNMLAAPLMQGKEILAVVMVINKIGELQFTKEDQEVFTKYLSFASLALKYSHLSYLYNVESRRSQILLWSANKVFEELTDIERQFHKALYTVRVYLNVERYSVALLDMTKQKEFFDEWPIKMGEVPPYKGPKTPDGREIHFYKIIDYLLVGKEEIKVIPSPADHWSLVSGLPTYVAENGFICNMMNAPADEFFTFQKEPVDGTGWIKNVLSLPIVNKKEEIVGIATFYNRKDGKPFDEYDEQITETLTQFLGWSLLNTDTYDKMKNLESRKNIASEMLMYHKSCTDKELQITILKTKEMLDKDTADCEQKDKMLKILQEELPDPTDVELYEFHFSDLVSEFDLIKCGIRCFEINAVIKFKIPADVLTRWMYTVRKG YRDITYHNWRHGFNVGQTMFTLLMTGKIKKYYTDLEAFAMITAAFCHDIDHRGTNNLYQLKSQAALAKLHGSSILERHHLEYSKTLQDESLNIFQNLNQRQYETVVHLMEVAIIATDLALYFKKRTMFQKIVDYVEKSETEEEEAIKYISSDPTKKEIVMAMMMTGCDLSAITKPWEVQSKVALMVANEFWEQGLERTVLQQQPIPMMDRKNKADEL PKLQVGFIDFVCTFVYKEFSRFHKEITPMYEGQLQNNRVEWKLRAD EYDAKMALIEKQRKEQEEMAVKKA VNGEVEAGDEGKEGKRGGKSRTCEIF\*

>KT749709\_PDE6C\_Bluespot\_ray\_34454-1-2

MGDVSKEAVERYLENPNPQFAKEYFDRKLRLESISALFNNGTKVELKDGASFRDLCKLEESDIVFELVREM QDVSNVEKQMHKVLQRIVTLVNADKGSFMFVYRSRNGVAELATRLFNVTDRDSSYESNLVASEAEIVFPLDMGVVGWTAHTKR VQNIADVQKDIHFSAFVDKQGTGYTTNLAAAPMVQGKEVLAVLMLVNKIGEPQFTKEDQEVFTKYLNFASLALKF SHINYLYNVEQRRSQILLWSANKVFEELTDIERQFHKALYTVRLYLNVERYSVALLDMTKQKEFFDEWPILMGEVPPYKGPKTPDGREINIFYKIIDYLLLEGKEEIKVIPSPADHWSLVSGLPTYVAENGFICNMMNAPADEYFTFQKEAVDETGWV IKNVLSLPIVNKKEEIVGIATFYNRKDGKPFDEYDEQITETLTQFLGWSLLNTDTYDKMKNLESRKDI AAEMLMYHKSCTDKELQITILKTKEKLDKGTADCEQKEMITILKEELPDCKIELYEFHFSDLPVSEFDLIK YGIQCFFEIKAVEKFKIPADVLTRWMYTIRKGYRDITYHNWRHGFNVGQTMFTLLMTGKIKKYYSDLEAFAMV TAAFCHDIDHRGTNNLYQMKSQAPLARLHGSSILERHHLEYSKTLQDESINIFQNLNQRQHETVMHLMEVAIIATDLALYFKKRTMFQKIVDNVEQ MENEEEEAIKFISDPTKKEIVMAMMMTGCDLSAITKPWEVQSKVALMVANEFWEQGLERTVLQQQPIPMMDRKNRDEL PKLQVGFIDFVCTFVYKEFSRFHKEIKPMYDGLQNNRVEWKSMADEYEAKMKLLEEQKEKEEMAAKTAANGGVGGDGK GNEESKRGGKSRTCEIF\*

>KT749710\_PDE6C-Partial\_Florida\_gar\_25537-2-1

MGELNKESVEKYLENNPQFAKEYFDKLLRAEVLGAAFSDTKVNVDVASIKEITQIHEATFIFELLKAIQDV

SNVEKTMHNVLQRIALLVKADKCSLFMSRSRNGIPELSTTLFNVTATSSFEENIVSPDSEIVFPLDVGIVGWV  
AHTKKTFFNIPDVKKNTFSDVFDKQTYTTKNMLACPVMNGKEVLA VVMANKTDEPEFSKADEELFLKY  
LNFATVILQQNQISYMYNVESRRSQVLLWSASKVFEELTDIERQFHKALYTVRNYLNCERYSVGLLDMTKE  
KEYFYDEWPVKLGAEPEYKGPKTPDGREVNFYKIIDYILHGTEEEKVIPTPPADHWSLLSGLPTYVAENGFICN  
MMNAAADDFTFQKEAFDETGWKIKNVLSLPIVKNKKEEIVGVATFYNRKDGKPFDEYDEQITEALTQFLG  
WSVLNTDTYDKMNKLENRKDIAQEMLMYQTKCTKSELQSILNTQEKFNQEPEDCDSKELVKLLKSNLPDP  
KEVELLEFHFSDFPVSEFDLIRCGIQCFVFLNVVEKFKVPAEVLTRWMYTVRKG YRDITYHNWRHGFNVGQ  
TMFTLLLTGRLKKYYSLEAFAMVAAAFCHDIDHRGTNNLYQMKSASPLARLHGSSILERHHLEYSKTLL  
DESLNIFQNLQKRQFDTVIHLFEVAIIATDLALYFKKRTMFQKIVDATEQMA TEEEQINYSNNPIRKEIVMA  
MMMTGCDLSAITKPWEVQSKV

>KT749711\_PDE6C\_Bowfin\_25775-1-1

MGELNKEAVEKYLENNPQVAKEYFDKKLRAEVLGAAFTDSKLDIKEAASMKEITQIYESSFIFEMIKELQNL  
TSVEKTVHKVLQRIAALVRADKCSLFMCRSRNGIPELSTTLFNVTENSKFEENIVAPDSEIVFPLDVGIVGWA  
AHTKKTFFNIPDVRKNNHFSDVFDKQTYTTKSMLASPIMNGKEPMA VIMAINKKDAPEFSKADEELFIKYL  
NFVNIILLQNYTAYLYNVESRRSQVLLWSASKVFEELTDIERQFHKALYTVRIY LNCERYSVGLLDMTKEKE  
FYDEWPVKLGDAEPEYKGPKTPDGREVVYKLYIDYILHGTEEEKVIPAPTPDHWSLLSGLPTYVAENGFICNM  
MNAPADDYFTFQKEAFDETGWKVKNVLSLPIVKNKKEEIVGVATFYNRKDGKPFDEYDEQITEALTQFLGW  
SVLNTDTYDKMNKLENRKDIAQEMLMYQSKCTNNELQSILNTKEKFKKEPEDCDAKELVKLLKSNLPDPK  
DVELLEFHFSDFPVSEFDLIKCGIQCFVFLNVVDKFKVPAEVLTRWMYTVRKG YRDITYHNWRHGFNVGQ  
TMFTLLMTGRIKKYYSLEAFAMVAAAFCHDIDHRGTNNLYQMKSASPLAKLHGSSILERHHLEYSKTLL  
ADESLNIFQNLQKRQFETVIHLFEVAIIATDLALYFKKRTMFQKIVDATEKMEKEEDQINHISNNPTRKEIVM  
AMMMTGCDLSAITKPWEVQSKVALMVANEFWEQGLERTVLEQQPIPMMDRNKAELPKLQVGFIDFVC  
TFVYKEFARFHKEITPMFDGLQNNRVHWKALADVHEEKVKAIEEEKKKQEEAAKKG DGAESGSKTCTI  
F\*

>KT749712\_PDE6X\_E.\_cirrhatus\_89665-1-1

MGSISKEDVESFLDNNPAFVKDYFEKMRPNVIAEIFSKEMEKEVTGSFIQLSKVEESEILFELVQNMSETLN  
MEKCVHKCLRRLAQLIDADRCSLFMYRQRNGTPEVATRLFNVTRTSSLEECLVPPDSEIVFSLDLGIVGHVA  
LTKKMVNVCDVQESPLFCDFDCKLTDYTTKNILATPIMNGNDVVAIIMAINKVSDTCFSKLDEEVFLKYLIF  
VSVCLKTHHLSYMHSCETRREGQVLLWAASKVFEELTDIERLFHKAMYTVRGYLNCERYSVGLLDMTKKQK  
EFFDEWPVKLGGEVPPYKGPKTPDGREIRFYKVIDYILIGKEEEKVIPNPPDDHWALSSGLPVYVAESGFICNIM  
NAPTDCFTKFNNEPVDETGFVTHNVLSLPIVKNKKEEIVGVVTFYNRKDNKPFDEFDEMIMEALTQFLGWSV  
LNTDTYDKMNKIENRKDIYLEMLNYHNKCTY GELQTIKTEEV LQKDLSSCEENEMKLLKAELPDPKQM  
ELYQFHFSDLIEELD LVKGGICLFQELGVLEKFKVPRDVIVRWMITV NKG YRNITYHNWRHGFNVGQTMF  
TLLTTGRLKKYYSLEAFAMLA AAFCHDMDHRGANNLYQMKSQSPLAKLHGTSILERHHLDYSKTLLTDE  
SINIFQNLNRRQYDNVIHLMEIAIIATDLALYFKKRTMFQKIVEQCEQLETEADAVKYITSDPTKKEIIMAMM  
MTACDLSAITKPWEVQSQVALLVAAEFWEQGLERTV LQQQPIPMMDRNKADEL PKLQVGFIDFVCTFVY  
KEFSRFHNEITPMFDGLKNNRVHWKALADEYEAKCKALETQNASPPLNQTQDMSAANGAGATPGKVVE  
APKSKTCLIM\*

>KT749713\_PDE6X\_G.\_australis\_45841-312-1

MGSQDQESVERFLDSNPAFAKEYFNRKLRPELISTMCDNQTGGGGGGGPATCSYVDISKVEESEVFLDLVR  
NMSETINMEKCVHKCLRHLA GLIDADRCSLFMYRQRNGTPEVATRLFDVTRTSALEDCLVQPEAEIVFPLD  
LGVVGHVAQFKKTVNHNVSEGKLFVFNVDKLTGYTSR NILATPIMNGKDVVAVIMAVNKVTGPAFTQLDT  
EVFMKYLIFASLCLKTYYSYMHACETRREGQVLLWAASKVFEELTDIERQFHKAMYTVRGYLNCERYSVG  
LLDMTKQKEFFDEWAIQMGVPPYKGPRTPDGREIH FYKIIDYILIGKEEEKVIPTPPDDHWALVSGLPVYVA  
ETGFICNIMNAPSDEMFKFSLNPVDETGFVMRNVL SLPVKNKEDIVGVATFYNRKDGKPFDEFDEMIMEAL  
TQFLGWSVLNTDTYDKMNKIEFRKDIALEMLFYHNKCTTTELHTVIKNKEILDKDLENCSEAELKKLVKQE  
LPDAKEM  
ELYEFHFSDL EETEFNLVKGGMRIFFELGVVDKFKVPPETLVRWMITVSKGYRTITYHNWRHGFNVGQTMF  
SLLMTGKLLKYYFTDLDAFAMVAAAFCHDIDHRGTNNLYQMKSAA PLARLHGTSIMERHHLDYSKTLLTD  
ESLNIFQNLNRRQYETVLHLM EVAIIATDLALYFKKRAMFVKIVDHCETLASEAEAIKYITCDP  
TKKEIIMAMMMTACDLSAITKPWEVQSKVALLVAAEFWEQGLERSVLQQNPIPMMDRNKAADLPKLQC  
GFIDFVCTFVYKEFSRFHPEITPMYAGLQNNRVHWKAQADQYDAKCKLLEEAKQKRTDAVKADTA VTNG  
GCEPPKSKSCVIV\*



>KT749714\_GEOAU\_c45841\_g3\_i1

MGSQDQESVERFLDSNPAFAKEYFNRLRPELISTMCDNQTGGGGGGGPATCSYVDISKVEESEVLFDLVR  
NMSETINMEKCVHKCLRHLAAGLIDADRCSLFMYRQRNGTPEVATRLFDVTRTSALEDCLVQPEAEIVFPLD  
LGVVGHVAQFKKTVNHNVSEGLFCNFVDKLTGYTSRNLATPIMNGKDVVAVIMAVNKVTGPAFTQLDT  
EVFMKYLIFASLCLKTYYSYMHACETRRGQVLLWAASKVFEELTDIERQFHKAMYTVRGYLNCERYSVG  
LLDMTKQKEFFDEWAIQMGEVPPYKGPRTPDGREIHFYKIIDYILIGKEEIKVIPTPPDDHWALVSGLPVYVA  
ETGFCINIMNAPSDEMFKFSLNPVDETGFVMRNVLSLPIVNNKEDIVGVATFYNRKDGKPFDEFDEMIMEAL  
TQFLGWSVLNTDTYDKMNKIEFRKDIALEMLFYHNKCTTTELHTVIKNKEILDKDLENCSEAELKKLVKQE  
LPDAKEMELYEFH

>KT749715\_GEOAU\_c45841\_g1\_i1

ELYEFHFSBLEETEFNLVKGGMRIFFELGVVDKFKVPPETLVRWMITVSKGYRTITYHNWRHGFNVGQTMF  
SLLMTGKLLKYFTDLDAFAMVAAAFCHDIDHRGTNNLYQMKSAAPLARLHGTSIMERHHLDYSKTLTLD  
ESLNIFQNLNRRQYETVLHLMVAVIIATDLALYFKKRAMFVKIVDHCETLASEAEAIKYITCDPTKKEI

>KT749716\_GEOAU\_c45841\_g2\_i1

TKKEIIMAMMMTACDLSAITKPWEVQSKVALLVAAEFWEQGLERSVLQQNPIMPMDRNKAADLPKLQC  
GFIDFVCTFVYKEFSRFHPEITPMYAGLQNNRVHWKAQADQYDAKCKLLEEAKQKRTDAVKADTAVTNG  
GCEPPKSKSCVIV\*

>KT749717\_CNGA1\_Bluespot\_ray\_37236-8-1

MTAEINTHRTYLYASRVSVHPADDEVEKMENGGQNRNQAIASDLEMSNINNCNNNDEEKGGKESKKNKKE  
NKGKSDGKKEKKRDKEKDKDKEKNKTKEEEKGKEEKKDDKKDDKKDDKKDDKKGGKIELAKLIPILDPA  
NMYYYWLMIIITMPVMYNWTMLIARACFEELQADYLFTWFILDYVSDILYIIDMYFRTKTGYLEQGLLVQD  
EKKLREKYFATLQFKLDVFLIPTDLLFFILGLKYPEIRLNRLSRINRMFEFVSRTTETRTNYPNIFRISNLVMI  
VIIIHWNACVYYSISKAIGFGADTWVYPNISPEFSRLARKYVYSLYWSTLTLTTIGETPPPQDSEYFFVAD  
FLVGVLFATIVGNVGSNMISNMNAARAEFQSRIDAIKQYMHFRKVS KDLEKRVIKWFDYLTWNKKA VDER  
EVLKYL PDKLRAEIAINVHLDLTKKVRIFADCEAGLLIELVLKLRPQVYSPEDYICRKGDIGREMYIIEGK  
AVVADDGITQFVVLSDGSYFGEISILNIKGSKAGNRRTANIKSIGYSDFCLSKDDLMEALTEY PDAKAMLE  
EKGRQILMKDGLLDLVAQLGADPKDMEEKITRLDTAIDNLQTKFARLLAEYNATQQKLERVTKIENKIK  
QSGMQFDYSGLIDVEAKDKAEES\*

>KT749718\_CNGA1\_Bamboo\_shark\_73640-1-1

MATVINTHQSYLRIPRVSVHPADDEVEQMENGGQSRQTQLVDDREMSNINNSNNNDEEKETKESKKSKE  
KKGKSGGKKEKKKDKKEKDKDNNKEKDEEKDKDEKKDEKKDDETDKQDIKKMLMNMIPITLPILDP  
GNMYYNWLMIIITMPVMYNWTMIIARACFEELQSDYLSTWFILDYVSDVIYILDMYLRTKTGYLEQGLLV  
DGKKLREKYFATI QFKLDVISLVPTDFLYFLGLEYPEIRLNRLTRISRLFEFFSRTTETRTNYPNIFRISNLV  
MYIVIIIHWNACVYFSISKAIGFGADTWVYPNVSIPEFSRLARKYVYSLYWSTLTLTTIGETPPPVEDSEY  
FFVVA DFLVGVLFATIVGNVGSNMISNMNAARAEFQSRIDAIKQYMHFRKVS KDLEKRVIKWFDYLTWNK  
KA VDEREVLKYL PDKLRAEIAINVHLDLTKKVRIFADCEAGLLIELVLKLRPQVYSPGDYICRKGDIGRE  
MYIIEGK LAVVADDGITQFVVLSDGSYFGEISILNIKGSKAGNRRTANIKSIGYSDFCLSKDDLMEALTEY  
PDAKAMLEEKGKQILMKDGLLDLDIAQLGADPKDMEEKVTRLDMAIDLQTKFARLLAEYNSTQQKLERVT  
KIENKIKQSGMQFEYSELVDAEAPTETEESSK\*

>KT749719\_CNGA1\_Florida\_gar\_59469-1-1

MASVIDTHRTHIVPPRIVLQDMDEDVERMESGESKDESPPSGPQALFNVNNSNNNEEDKDKKKKKEKKEK  
AKKEKKEKKEKDKKEKAKEEKEKAEKEKEKEKDKKEKKEKQPKKELYIIDPAGNMYYNWLVFVITMPVM  
YNWTMIIARACFEELQHDYLITWFIVDYVSDLIYLADMLFRTRTGYLEQGLLV RDEKCLRERYMDTTQFKI  
DLLSMIPTDVMYFKMGLNYPEIRLNKLFVGRMFEEFFQRTTETRTNYPNIFRISNLVMIYVIIIHWNACLY  
FSF SKAIGFGADTWVYPNVSDPEFGRLVRKYAYS LYWSTLTLTTIGETPPPQDSEYFFVIDFLVGVLF  
ATIVGNVGSNMISNMNAARADDFQARIDAIKQYMHFRKVS KDLEKRVIKWFDYLTWNKKA VDEREVL  
KYL PDKLRAEIAINVHLDLTKKVRIFADCEAGLLIELVLKLRPQVYSPGDYICRKGDIGREMYIIEGK  
LAVVADDGITQFVVLSDGSYFGEISILNIKGSKAGNRRTANIRSIGYSDFCLSKDDLMEALTEY PDA  
KAMLEEKGRQILMKDGLLDLIAKLGPDPKDMEEKVNKMYGNLETQTKFARLLAEYEAQQKLRVTKIENK  
LMSSGQVVMSELVDPEAGAEPAEAKEKD\*

>KT749720\_CNGA1\_Bowfin\_23715-1-2

MTAVINTHHTYLVPPIVLDQMDDEDLERMEIGESTDQCPPGAGAAFNVNKNNNNEEEEEKKEKKEKKEK  
DKKEKKEKKEKKEKDKENAKKNKEKGTEKEKEKEKEKEKEKEKEKEEPPKIDIFIIDPAGNMYYNWLFVITMPVM  
YNWTMIARACFEELQHDYLVSWFILDYVSDIILYLDMLFRTRTGYLEQGLLVKDEKRLRERYLQSPQFKL  
DLVSMIPTDVLVYFSFGLNFPEIRLNKLFVGRMFEEFFQRTETRTNYPNIFRISNLVMIYVIIIHWNACLYFSFSK  
AIGFGADTWVYDPDVTDFEFGRLRKYAYSLEYWSTLTLTTIGETPPPVDSEYLFVVDFLVGVLFATIVGN  
VGSISMNMAARADDFQARIDAQYMHFRKVSKDLEKRVIKWFDYLWTKKAVDEREVLKYLDPDKLRAE  
IAINVHLDLTKKVRIFADCEAGLLIELVLKLRPQVFSFGDYICRKGDIGREMYIIEGKLA VVADDGITEFVV  
LSDGSYFGEISILNIKSGKAGNRRTANIRSQGYSDLFCLSKDDLMEALTEYPPDAKAMLEEKGRQILMKDGLL  
DLEVAKLGPDPKDMEEKVNKMYVSMETLQTKFARLLAEYESTQQKQKQRVTQIEKKITDPGQVEPSEPVD  
PEAGVASAEAEAKTE\*

>KT749721\_CNGA3\_Bluespot\_ray\_36860-6-1

MATVSTQRSYPALHRLSVRNNDDELIERIENGSSRTHSLCEDSSSELQAVTSAEPKQDQESRRSSFTGNGAFA  
RLTNFIIVLRNWAATQQIHDEDQRPDSFLERFRGPDIKDVSSRESNTQSAAGDPEHQGRSCKKILAKFNVNKCN  
NEENFCPLAQFNVNNTNNNDKGGKVEEKDVKKEEKKDEKKKEEKDIYIIDPADNLYYRWLSIIAM  
PVMYNWCMLVCRACFEELQTKHLALWLVLDYVSDAIYIVDSIVRFRGTGFLEQGLLVKDGKLRDNYMKM  
PQFKLDLTLPTDLAYLTMGMNYPEVRFNRLFRFSRMFEFFDRTETRTNYPNVFRIGNLVLYLIIIIHWNGC  
IYYAISKSIGFGVDTWVYPNISHPEYGRLSRKYIYCLYWSTLTLTTIGETPPPVKDEEFLFVVIDFLVGVLFAT  
IVGNVGSISMNMAARAEFQSKIDAQYMQFRKVSKDLEVRKIKWFDYLWINKKSINEKEVLKSLPDKLKA  
EIAINVHLETLTKKVRIFADCEAGLLIELVLKLRPQVYSPGDYICRKGDIGREMYIIEGKLA VVADDGVTQF  
VVLSDGSYFGEISILNIKSGKAGNRRTANIRSIGYSDLFCLSKVDLMEALTEYPPDAKKILEEKGRQILMKDNL  
IDEEAAKEGADPKDLEEKVERMEASLDTLQTKFARLMAEYKSTQLKQKQRITKVENKVNKFGSGYLSDFG  
DSATDTEGGK\*

>KT749722\_CNGA3\_Bamboo\_shark\_32916-1-2

MATISTHQSYPVHRLSVRNNDDELIERIENGNSRTHSLCEDTSSELQGVTSMETKQGPESRRSSFTGRGALA  
RFTHFVIMVRNWTTRQMHSEDQRPDSFLERFRGPEIKDVSSRESNTQSAIGNLEHQGKSKSYRLLAKFNINN  
CNNKEDDKVEEKKDEEKERKNDEKKKEVKKDWYVIDPSENLYYRWLSVIAVPVLYNWCMLVCRACFDE  
LQVRNLTWLVLDYLSVYVTDASVFRGTGFLEQGLLVKDTKLRQNYMRMPQFKLDVLSLLPTDLAYI  
WLGFNYPEVRFNRLFRFSRMFEYFDRTETRTNYPNMFIGNLVLYLIIIIHWNGCIYYAISKSIGFGIDTWVY  
PNISHPEYGRLSRKYIYCLYWSTLTLTTIGETPPPVKDEEYLFVVIDFLVGVLFATIVGNVGSISMNMAARAE  
EFQSKIDSQYMQFRKVSKDLEARIIKIKWFDYLWINKKTVDKEVLKLNLPDKLKA EIAINVHLDLTKKVRIF  
SDCEAGLLIELVLKLRPQVYSPGDYICRKGDIGREMYIIEGKLA VVADDGVTQFVVLSDGSYFGEISILNIK  
GSKAGNRRTANIRSIGYSDLFCLSKADLMEALTEYPPDAKKILEEKGRQILMKDNLIDEEAAKEGADAKDLE  
EKVERMESSLDSLQTKFARLMAEYNSSQMKLKQRLTRVEKTVKIYGSYLSDGLDSSDIELGKQ\*

>KT749723\_CNGA3\_Florida\_gar\_22780-1-1

MATISTQQSYPAVHRLSVRTNDDDLDRINGNSRAHSLCEDTSSELQAVSMETRGLPESRRSSFTGTGAM  
ARLSRFIFALRSWATRRLLHEDQRPDSFLERFRGPDLEKEASSRESNAQSATGNPDHPHRGKNRWPLANFNI  
NNCNNTDDKEDKKEEKKEEKKEEKKEEKKEEKKEEKDEKDDKKEEKKEEKKEEKFIVDPATDLYYRWLTIAT  
PVMYNWCMLICRACFDELQTKYITLWMVLDYSSDVYFLDTFVFRGTGFLEQGLLVKDPKLRNYMKTP  
QFKFDLLSMVPTDIAVIKVGNNYPELRFNRLFKFARLFEFFDRTETRTNYPNIFRISNLVLYLIIIIHWNA  
AISKITIGFGSDTWVYPNISHPEYGRLLARKYIYSLYWSTLTLTTIGETPPPVKDVEYLFVVCDFLIGVLIFAT  
IVGNVGSISMNMAARAEFQAKIDSQYMQFRKVSKDLEARVIKIKWFDYLWTKKTCDEKEVLKLNLPDKLKA  
EIAINVHLDLTKKVRIFQDCEAGLLIELVLKLRPQVFSFGDYICRKGDIGREMYIIEGKLA VVADDGVTQF  
VVLSDGSYFGEISILNIKSGKSGNRRTANIRSIGYSDLFCLSKDDLMEALTEYPEAKKALEEKGKAILMKDGL  
IDEEVANQSGDPKDLEEKVENLESSLDMQTKFARLMAEFTSSQVKLQRLTKMETKMKSLGSGELCDGN  
EADSEAPKEEKKDK\*

>KT749724\_CNGA3\_Bowfin\_24904-1-1

MATISTQQSYSAVHRLSVRTTDDDLDRINGNSRNSRAHSLCEDTSSELQRAISMEARGLTESRRSSFTGTG  
AMARLSRVLFRNWAARRLHPEDQRPDSFLERFRGPPELKEASSRESNTQSTAGNPDRPHRAKNHWPLAN  
FNVNNTDDKEDKKEEKKEEKKEEKKEEKKEEKKEEKDEKDDKDKDAKKDDKKEEKKEEKNEVYIIDPAT  
DLYYRWLSIIAVPVMYNWCMLICRACFDELQTDYITLWVLDISSDIYLDTFVRLRTGFLEQGLLVKDSK  
KLRENYVKTQQFKYDVISMVPTDIAVIKVGNNYPELRFNRLFKFARLFEFFDRTETRTNYPNIFRISNLVLY  
LIIIIHWNAACIFFAISKISIGFGTDSWVYPNISHPEYGRLLARKYIYSLYWSTLTLTTIGETPPPVRDVEYLFV  
CDFLIGVLIFATIVGNVGSISMNMAARAEFQAKIDSQYMQFRKVTKDLEARVIKIKWFDYLWTKKTCDEKEV

LKNLPDKLKA EIAINVHLDLTKKVRIFQDCEAGLLIELVLKLQPQVFS PGDYICRKGDIGREMYIIKEGKLAV  
VADDGITQFVVLSDGSYFGEISILNIKGSKSGNRRTANIRSIGYSDLFCLSKDDLMEALTEY PDAKKALEEK  
KAILMKDGLIDEEAAKQGTDPKDL EEKVVKLESSLDLMQTKFARLMAEFTSSQTKLKQRLTKMETKVKK  
MGSEEISDGMEADNEAAKAE\*

>KT749725\_CNGAX-Partial\_E.\_cirrhatus\_139717-3-6+102332-1-3

FVLNPSGNLYYNWLVFVISVPVFYNLCLLICRACFDELQIKYITTWLICDYLSDAIYLLDI  
WVRFHTGFLEQGLIVCDLQRLKENYVKTLYFKLDVVS VLPDLDG YLKLGLHWPELRFNRL  
LRLHRRISEFFGRVETR TNFPNLFRI SNLILYIVVIIHWNACLYFAISKIIGLSDTWVYP  
DVSDPEFGTLSRK YVYSLYWSTLTLTTIGETPTPCRDSEYIFVVVDL VGVLIFATIVGN  
VGS MITNMNAARATFQARIDAIKQFMHFRKVSPELESRVITWFDYLWTNNKA VDERAVLG  
VLPEKLRAEIAANVHLN TLK KVRIFADCEAGLLIELVLKLQAQVFS PNDYICRKGDIGRE  
MYIIKEGQLAVVADDGVTQFVVLGDGNYFGEISILNIKGSKSGNRRTANIRSIGYSDLYC  
LSKDDLMEALIEY PDAKKMLEEKGRQILVKDGLIDEEAANVEEPRNTTEQLDNLESGLEA  
TKTRLASFLAETFATHAVLKQRITRLEILMKLVEE\*

>KT749726\_EPTCI\_c139717\_g3\_i6

MQTIQQFQTIRNRILRTLIGLSSS SIFEENEERKKNLSGILQTFVLNPSGNLYYNWLVFVISVPVFYNLCLLICRA  
CFDELQIKYITTWLICDYLSDAIYLLDIWVRFHTGFLEQGLIVCDLQRLKENYVKTLYFKLDVVS VLPDLDG  
YLKLGLHWPELRFNRLRLHRRISEFFGRVETR TNFPNLFRI SNLILYIVVIIHWNACLYFAISKVNHCNLEKQ  
LKKK\*

>KT749727\_EPTCI\_c102332\_g1\_i3

YKVHLKGPTLQNVIPNFPQAIGLSDTWVYPDVSDPEFGTLSRK YVYSLYWSTLTLTTIGETPTPCRDSEYIF  
VVVDL VGVLIFATIVGNVGS MITNMNAARATFQARIDAIKQFMHFRKVSPELESRVITWFDYLWTNNKA V  
DERAVLGVLPEKLRAEIAANVHLN TLK KVRIFADCEAGLLIELVLKLQAQVFS PNDYICRKGDIGREMYIIK  
EGQLAVVADDGVTQFVVLGDGNYFGEISILNIKGSKSGNRRTANIRSIGYSDLYCLSKDDLMEALIEY PDAK  
KMLEEKGRQILVKDGLIDEEAANVEEPRNTTEQLDNLESGLEATKTRLASFLAETFATHAVLKQRITRLEIL  
MKLVEE\*

>KT749728\_CNGAX\_G.\_australis\_57616-1-3

MGRKSNTNIGDCS NSNNNNKGDNNDDDKADKDG VPTKEEPKPAPPPPPPTETPTPPKEVFVLDPSSTL  
YYHWLCVVSIPIMYNLLMLVC RACFDELQTEHTYTWM TLDLLYLVD TWVRLHTGFLDQGLIVRDPK  
RLRHNYTKTRTFRLDIISILPTDIVYIWLGNPFPVRYNRVVRIYRMSEFFQRTETR TNFPNLFRI SNLVLIVV  
IIHWNACVYFAISKAIGFGSDQWVY PVDNIPEYSHLMRKYVFSLYWSTLTLTTIGETPPPARDEEFV FVCD  
FLVGV LIFATIVGNV GAMISNMNAARAEFQTRVDG VKRYMRLRGVTRELQERVVAYFDH VWAYGKAGD  
EAAV LASLPVRLRAEVASNVHMETIKKVRIFADCEAGLLIELVLKLKPQVFGPGEYICRKGDV GREMYIVK  
EGR LAVVSD DGLKQFVVLSSGSYFGEISILNIKGSKSGNRRTANIVSVGYSDLYCLSKDDLMEALTEY PDAK  
QALEEKGRAILMKDGLIDEDCGNLG PDAKTL DQKVSRL ETMLDGVHTRLARLLAQQGSSVASTRARL TSL  
ETSVCGIYSALGNAAPRILTVTVPPDE\*

>KT749729\_CNGAX-Partial\_M.\_mordax\_41352-3-3

AAAAAALSAPRPELRFNRLRLRLLEFFERTETRTARPNAFRVANLVYLIVVHWNACAYFAASRAIGFG  
ADAVVY P DVRHPEHGRLARKYVYSLYWSTLTLTTIGETPAPVRDEEYAFVVADFL VGVLVFATIVGNVGA  
MIANANAHRAAFQARVDAVKTYMRSRGVAADVEARVIRWFDHLWSSRKAADERQALGGLPDKLRAEIAI  
NVHLDLTKKVSIFADCEAGLLVELVLKLRPVVYSPGDYICRKGDIGREMYIIKEGKLAVVADDGVTQFVVL  
SDGAYFGEISILSIRGSLSGNRRTANIRSVGYSDLYCLSKDDLMEALTEY PDAKAMLEEKGRDILMRDNLIDP  
RVAAAGDGAGGDGAGGDLGERVA AVDGA VRVLGERLAR

>KT749730\_CNGB1\_Bluespot\_ray\_37057-10-2

MTLIFLADCLLNLPIDLQCLRVVHHTHTGTGFGNGTCSLTLPERMFTWIAKVAPQPPQVRHLET SPEAKG  
DSTPAEEQETVKA EKSKNEASGCCDAGTQGEADQTADASSGGGVLVWIVQQMNRFNLPKAVLDSEKNAG  
NQEKEPSKESTTSPAPEPAPPPAPEPAPSLAPEPAPPPAPEPAPSLAPEPAPPPAPEPAPSLAPEPAPPPAPEPA  
PSPAPEPALVPEKAPAPNIQLSGQPSVGGAPSDQHQQDKDRRGVLSWVQGLKGVLPQPEEKRPTEAAE  
VSPAPQLIKEE PVNPQKEEPAVDTRPEPEIKPQQEAEVKEEVVATEAPEEPINHQAECSTSSAPTGTIETLHSS  
ASGNSLFEWLKQSLEKVIPQPTGIAMPASTKVETESITENKVPVEEKDPEVKVAEITEEVSKAVTIEVAPAEP  
IPDPVVKEAMPEGTAKTSEDDKSVFSWL VQGLGKVVPQPVTRSQLPKEDVETTAACSAEEAPSEMVLEDV

DSDWDEEAQCHDAEAQTSECETLEQLTKQVIRIEVTPVVGSSQLWNITEPEPEPETDPMPLPCEEIESNEDVQLT  
GPVLIHEEVSCCEDIPATDSGQEKECEEIDQNEPPVIDTTEEEASSEDDQPPVLDQNSVCPEGTEQIVQPYDE  
VVEYQLIEAAEASHQHEEEVLKTKLEQEDPPNASWPSVKIEDVDSEGDLSKSGQNKLPPIESSSSTSKGGTL  
AVPSIHRTARRNKSSHEASAGEPTQELHGEAWQSQTSLQVDDSFRRSQGGSTSSITSAIVNERLQELVKLFKE  
RTEQVKEKLIDPDASEDEGSPTASPSKAAPAAPAPPEEKKEDEEKEEEHYCEMMCCRFKTRPWFRRIKSVG  
LPSSVDPFSNPLYVLWLSIVVLAWNWNVWLIPVRCRTPFYQTPDNIHLWLLMDYFCDLIYLTDMIIFQSRLQF  
VKGDIITARKLMRENYLKTQKFKMDLVSLPLDILYLKLGFRVLLRVPRLLYMTFLEFNDRLEAIMSKA  
YIYRVIRTTIYLLYSLHINSCLYYWASDYEGIGSTKWVYDGEGNSYMRCYYWAVKTLITIGGLPDPETVFEI  
FFQLVNYFMGVLIFSIMIGQMRDVVGAATAGQTYRRCMDNTVRYMNLKIPRGVQNRVRKWYEFTWES  
QGMLDETELLVQLPDKMRLDIAIDVNYISIVSKVALFQGCRRQMVYDMLKRLKSVVYLPGDYVCKKGEIG  
REMYIIKAGEVQVVGPPDDKT V FVTLRAGSVFGEISLLSVGGGNRRTANVVAHGAFANLFILDKKDLNDILIH  
YPDSQKLLRKKAKKLLSKDGGKAVKPAPKGFQHIIPRPETPKLFLAALS VAGKYGIKGTFSLIK KLMESA  
SLQPIQP P P P P V H R R S P V S V K K L E D V D D D D D E V I S E T V D S S V M I K M S P S H D G L K E Q I L S V E V P D V E E K S E K \*

>KT749731\_CNGB1\_Bamboo\_shark\_41853-1-3

MFTWIAKVAPQPPQPVKHLEITPEVKSTSQPAEELQEEKTENFTENTEQASLPKNETDIPSNPGETQAEPDQV  
PVPSSSETSAGGGVLVWIAQNLSRLIPQHLGSPTLPKAAAPAESEKEIEIKEEEPITVPDPTPAPDPAPVLDPALVP  
ESVPAPDDQPLNRAPIAENPSIQDQRDGGRRSGGVFRWFVQGLEKVLQPPEGKSRPTNVSVVAAEVSTAPQ  
EETAKAQTEQSTAETMPEPVVKPEPEPEPEPEPEPELKVEVA VVPETPKEATVQQAELPTDTGSIVSVIEMPQ  
SSASGSSMFGWVTQSLGKVIPQPVGSSVPVTA KVMEPAPQEYEVVVEEKEPQLNVTNVNEEVPKAVTIE  
VVPADPTPEPIVKDENQPAGEPVTKTSNEEA KSVF SWLTKGLGNVVPQPVIKSQLTKEDDRITITACHAEEIP  
VCIPKEMELEDIESDWNNEEVQYLDAETQTSECEALA QVKTQTTATDVTVVKQSDEIPEEDEERQLWSITEEQ  
EVEAEIVK VCEGSESSEDL PSEEAETVCEGTKSSEDQSPTDLVQICEEAKTDDNLPAAVNLT AICSEESDQTV  
PPKLDDEASEDQVLATVENS SP SQEEIILKSEL DQGD PHTTLWPSVNIEDVDSEGVTLTPENGQLPPTKVPSS  
PYKSRTLTVPGVPM SARRSKSSYHENVDEPSEELPVQAWNSQTNLQVDDSFRRDKQGSTTSITSAIVNERLQE  
LVRSFKERTEL VKEKLIDPDASEDEASPTASPTKKA VEAPAPPPPEEEKEEDEEHYCEMMCCRFKTQPWIR  
RIRGLGFPSSVDPFSNPMYVLWLSIVVFAWNWNVWLIPVRCRTPFYQTPDNVHLWLLMDYFCDLIYVIDMA  
FFQSRLQFVQGGDIITAIKPMRENYMKT PKFKMDLVSLPLDILYIKLGFRPVLRFPRLMKYMTFLEFNDR  
EAIMSKAYIYRVIRTTIYLLYSLHINACLYYWASDYEGIGATKWVYDGEGNSYMRCYYWAVKTLITIGGLP  
DPQTVFEILFQLVNYFTGVFIFSIMIGQMRDVVGAATAGQTYFRNCMDNTVRYMNSYRIPRFVQNRVRKW  
YEFTWESQGMLDETELLVQLPDKMRLDIAIDVNYISIVSKVALFQGCRRQMIYDMLKRLKSVVYLPGDYVC  
KKGEIGREMYIIKAGEVQVVGPPDGKT V FVTLRAGSVFGEISLLSVGGGNRRTANVVAHGAFANLFILDKK  
LNDILTHYPDSQKLLRKKAKKLLSKDDGKDVKQPKGIQHIIPRPETPKLFLAALSITDKFGIKGTFSLIKQK  
LRESAKMKPHMPASP V H R R S P V P V E K V E D D Y D D E V V S E S S D Y S V V I R M S P S H R K D K E Q I L S V E V P A E E E E  
DSEK\*

>KT749732\_CNGB1\_Florida\_gar\_28066-1-2

MPLEETPALQEASQEPPTHPRILAMQQEDAETQTERWTPLLQAIQQEAEAAARAALDRLRQEKMATEKTT  
EELGERAEQSVGELDDGEQRLLDVVC PAGGFPSALHTELGEDGTPAASEGSPAPPEAATEPEEEEPVREGSPG  
KQQSPVGEACAVQEPEPEPEPEPEPEPEPEPEPEPEPEPEPEPEPEPEPEPEPEPEPEPEPEPEPEPEPEPE  
PGPEPEPEPEPEAEPEAGEGGSPAQQPQRVQESPVREVPPAEDLREEEAQEAEPVTQQPDTTEALEPPAGAH  
QEEESQAVEEECGESSRLSIHPSVNVEDVSDGDASGGHQKTSPVILPSSPYTSKTLTVPGVPVAARSSSPDK  
EKKLYSQEESMEDAETTVKAWPSQTSLLSEDEMRRER PASAASQTSTIVNERLQELVKMFKERTERVKEKLI  
DPDESDKDSPTSATPEKKLPPPPPPPEEKKEEPAPKKEGEEHYCEMLCCKFKTMPWMTRLKEYRFPQSIDPFT  
NLIYVLWLFVTA A W N W N V W L I P V R W A F P Y Q T P D N I H L W L L M D Y L C D T I Y I L D I L V F Q P R L E F V R G G D I V C  
DRKDMRENYMKSHRFKMDLIALFPLDLLYLKVG VNSLLRFPRLLYMAFFEFNDRLEAIMSKAYIYRVIR  
TAYLLYSLHCNSCLFYWASDYEGLGSTKWVYD G I G N S Y I R C Y Y F A V K T L I T I G G L P D P T T L F E I I F Q L I N Y F V  
GVFAFSIMIGQMRDVVGAATAGQTYRACMDNTIKYMTSYRIPRDVQNRVKTWYDYTWQS QGMLDEQE  
LLIQLPDKMRLDIAVDVNYISIVSKVALFQGCRRQMIYDMLKRLKSVVYLPGDYVCKKGEIGREMYIIKAGE  
VQVLGGPDGKT V FVTLRAGSVFGEISLLAVGGGNRRTANVVAHGAFANLFILDKKDLAEILVHYPESQKLLR  
KKAKKMLTKDKKPTDEKAEQKTGKKA I P L Q P E T P K L F Q A A L E V T E K S G I K G T F S K L K Q K W H K S S S V E P S S S  
VPVPPGSPVHRRSPIPRELPEVEEEDIVSQASDSSMLIRMSPGHHGREQVLTVEVSPKEEGEPTGEAAPAAEG  
DPKGEGESKK\*

>KT749733\_CNGB1\_Bowfin\_24179-1-3+23872-1-1

MILEEVESDWENEPGAQAETLEMLPAPREPPSHPRLRVLLLEDAETQTERWTPILHLTPPETDGVRQDPKAV  
EEPVQETAEEPLEEV TENLDDGEELHNIQEEENEEDPELRLIQEESEEAEEENKFT ECLVDVCPAGGFPSPPP

PESVEEEKAAAGEQTHPQLGPEARVEGDPDGGVQKTGEVSPEQGQSAVKEDSPVRVSEAAKQPSVVEEPPQ  
EVKQESPVKEPSPGQDPEPQPQPEPEPVQDAEAVKELVPVREESPVKEVQPTPAQKGVAAACEPQPVTQQPK  
RSEEVSPTASVNQEEETEAVEENCCEGSRVNVHPAVNVEDVDSKDSKSDSPRKLPLVLPQSPYTSKTLTVP  
GVSVASRSRSLELEKLYNQEDSVEETETTVAWPSQSSLLMEDGGRERPASVTSQTSIAIVNERLQELVKM  
FKARTERVKEKLVDPDDSDEESATSSPVKKAAPPPPPP  
PEEKAEPEKKEEEHYCDMLCCKFKTMPWMRQLKRYHFPKSIDPFTNLIYVLWVFFVTLAWNWNVWLIPV  
RWAFFYQTPDNIHLWLLTDYLCDTIYILDILVFQPRQLQFVRGGDIVCDKDKDMRENYMKTLRFKMDLISLFL  
DLLYIKVGVNSLLRFPRLKYMSFFEFNERLEAILSKEYIRVIRTTAYLLYSLHCNSCLFYWASDYEGLGST  
KWVYDYGIGNSYIRCYFYFAVKTLITIGGLPDPTTLFEIIFQLVNYFVGVFAFSIMIGQMRDVVGAATAGQTY  
RACMDSTIKYMTSYRIPRDVQNRVKTWYDYTWQSQGMLDEQELLVQLPDKMRLDIAVDVNYISIVSKVAL  
FEGCDRQMIYDMLKRLKSVVYLPGDYVCKKGEIGREMYIIKAGEVQVLGGPDGKTVFVTLRAGSVFGEISL  
LAVGGGNRRTANVVAHGAFANLFILDKKDLSEILVHYPESQKLLRKKAKKMLSKDKKPKQGEKPTSTQVIPPR  
PGTPKLFQAALQATEKSGMKGTFTLTKQMAHTSSSDEPSSSMPIPPGSPVHRRSPVPRELPEEDEEEDVVSEA  
SDSSMLIRMTPAHDGHEELLSVEMPHTEEEEPKE\*

>KT749734\_AMICA\_c24179\_g1\_i3

MILEEVESDWENEPGAQAETLEMLPAPREPPSHPRRLRAVLLEDAETQTERWTPILHLTPPETDGVRQDPKAV  
EEPVQETAEEPLEEVTENLDDGEELHNIQEEENEEDPELRLIQEESSEAEENKFTTECLVDVCPAGGFPSPPP  
PESVEEEKAAAGEQTHPQLGPEARVEGDPDGGVQKTGEVSPEQGQSAVKEDSPVRVSEAAKQPSVVEEPPQ  
EVKQESPVKEPSPGQDPEPQPQPEPEPVQDAEAVKELVPVREESPVKEVQPTPAQKGVAAACEPQPVTQQPK  
RSEEVSPTASVNQEEETEAVEENCCEGSRVNVHPAVNVEDVDSKDSKSDSPRKLPLVLPQSPYTSKTLTVP  
GVSVASRSRSLELEKLYNQEDSVEETETTVAWPSQSSLLMEDGGRERPASVTSQTSIAIVNERLQELVKM  
FKARTERVKEKLVDPDDSDEESATSSPVKKAAPPPPPP

>KT749735\_AMICA\_c23872\_g1\_i1

PPPPPEEKAEPEKKEEEHYCDMLCCKFKTMPWMRQLKRYHFPKSIDPFTNLIYVLWVFFVTLAWNWNVW  
LIPVRWAFFYQTPDNIHLWLLTDYLCDTIYILDILVFQPRQLQFVRGGDIVCDKDKDMRENYMKTLRFKMDLIS  
LFPLDLLYIKVGVNSLLRFPRLKYMSFFEFNERLEAILSKEYIRVIRTTAYLLYSLHCNSCLFYWASDYEG  
LGSTKWVYDYGIGNSYIRCYFYFAVKTLITIGGLPDPTTLFEIIFQLVNYFVGVFAFSIMIGQMRDVVGAATAGQ  
TYRACMDSTIKYMTSYRIPRDVQNRVKTWYDYTWQSQGMLDEQELLVQLPDKMRLDIAVDVNYISIVSK  
VALFEGCDRQMIYDMLKRLKSVVYLPGDYVCKKGEIGREMYIIKAGEVQVLGGPDGKTVFVTLRAGSVFG  
EISLLAVGGGNRRTANVVAHGAFANLFILDKKDLSEILVHYPESQKLLRKKAKKMLSKDKKPKQGEKPTSTQV  
IPPRPGTPKLFQAALQATEKSGMKGTFTLTKQMAHTSSSDEPSSSMPIPPGSPVHRRSPVPRELPEEDEEEDV  
VSEASDSSMLIRMTPAHDGHEELLSVEMPHTEEEEPKE\*

>KT749736\_CNGB3\_Bluespot\_ray\_35987-1-2

MFHKLGFGRKVTPEKQPEPKTVEIPEVGGQSTEQESETAKNESRKTEEEVMVVKIAPTNTTEQAVTSETSLW  
KNATKVTPSTEEAKSQRSEAIPLNLLRKHESKDKETGFNNSLSNEREPQATVLNSDYADAQMQLVQRMR  
ERTSLYKEKLFQDSTSSDQTLPPTPVKKPPPAKEVNDKMPPPDKDKKDEEKPEKEKDEAKLEELGCDIL  
GCKFKRHSIKKFVQQLKIPESIDTFSDLHYMVWISFVVLAWNWNCFWIPMRWAFNYQDPQFLSIWLTIDYL  
CDFIYLLDMLVFQVRLQFVKQGDIIISDKIEMRKHYMKSLKFKLDLASIIPFDLLYLLLDYNPLFRLNRLKYS  
IFFEFNNQLESVMKKAIIYRIARTVGYLLFLLHVNAACLYYWASDFEGIGSNKWVYNGRGNRYLRCYYWA  
VRTLITIGGIPEPVTLELQFVQGCNYFTGVFVFSLLGQMRDIIGAATAGQSYQTSLDNTVAYMNTYSVSR  
YVQNRVRKWEYIWEYQGLDVSEMMEGMPVKMQLAIAIDQNYEIVSKVDLFKECDQMIYDMLLRLKS  
VVYLPDFVCKKGDIGKEMFIKSGVQVLGGPDGKTILVTLKAGSVFGEISLLAAGGNRRTANVSSGF  
TNLFILNKITLNEILVYYPDSQKILKKAKKLAFAGDKAKKADVHQPANGLLFLFRQRPDTPKFYHIMLAAI  
KEKGLDLLSKFKETETKLKVHNQMKLDATTVGTKNIKKFSPTDNERLEGNECSKTEEKARTCE\*

>KT749737\_CNGB3\_Bamboo\_shark\_40333-1-5

MFSKLWVQKVTPKQEVLEGIQKVTSQQKDQKSKEQETKVRENESLKAEEKDTEFKSVSTNTQAMSQSPPC  
WNRTKEPKSQTTNATVSKQGVESLHIEPASMEEEVGLHNTSSSECEQEQRVFLSDRADAQLHSLVLRVRE  
RTSLYKEKLISEDGSSSDETPPASPKKAPAPKDDEEKQQQEISHDETKTEEA YYCDMVCFEFKRLSIKIIH  
KLRIPESIENSDWRYVLWFLVALAWNWSCWFIPVRWAFNFQTPDTLPYWLTMDYICDFIYLLDMLVFQT  
RLQFIKQGDIIINKEEMKKYYMQSLKFKLDLASVIPFDLFYLVFDCNPLFRLNRLKYLAFFEFNYRLEAIM  
EKAYIRIVRTTGYYLLHINACIYYWASVYEGISSTKWVYNGKGNRYLRCYYWAVRSLITIGGISEPVTL  
FEIIFQGCNYFIGVVFVFSLLGQMRDIIGKATTEFSYYQSSIDNTMNYMNAYSVSKCVQNRVRKWEYETWE  
SQLLASSELENLPVKMQLSIAIDQNYAIVSKVDLFKECDKQMTYDMLLKLKSVVYLPDFVCKKGDVG

KEMYIIKTGQVQVLGGPDDKEVLVTLKAGSVFGEISLLAGVGGNRRTANVIASGFTNLFILDKKTLNEILMN  
YPDSQKVLKRKARKLFPVEKDKSKSKCNPANTSIFLIRPKQDTPKLFNILLAVKSKGLTLLRRFLKMETKVI  
\*

>KT749738\_CNGB3-Partial\_Florida\_gar\_26657-2-1

MFNKLKSGLGKVIPQKSEVTKNPEDLTQPAASVAPAPPSTANAKPEAQEQKPKKEKQNAATKEADPKSAPC  
APAPAPQAPPSEPPQAKADVLNSERKAEDLADSPGDPACQEEVGPASVPIINKYTDDHLRDLVKRLKERTA  
LYREKITDKNASSPEPSPPPSPLKPPPKKEEKKDEKKDEKKEEAQVEEAKPDEEHYCNMLCCKFKTKALK  
DKLKKCKLPESLDEFTDRRYIFWLFIVSLAFNYNCWFIPARMAFPCHTAKSIPYWIFFDTLSDIYIVDTLVFQ  
TRIQFVRGGDIYDRKEIKKHYESARYRIDLISVLPIDLLCFRFGFKSVFRINRFMKRESFFDFNDRLEGIMSK  
AYIYRVIRTTGYLLYILHLNACLYYYASDYEGIGSTKWVYDGEUNA YLRCCYWA VRTLITIGGLPEPVTVF  
EIVFQLLNYFTGVFVFSLLIGQMRDVIGAATAGHTYFRASMDSTVAYMNTYNIPKLVQNRVRTWYNYTWA  
SQGMLDESELLEQMPMTMRTAIAVDVNFNSVSKIELFKGCDNQMIVDMLLRLKSIVYLPGDYVCKKGEIG  
REMYIIKQGEVQVLGGPDGTVLVTLRAGAVFGEISL

>KT749739\_CNGB3\_Bowfin\_26035-1-1

MFSKLKWGLGKILPQPDDGRKPEDPTPPAAEDPKPKAQEEKPKKEKENETKQEANAQPPTSAHDADPNKEA  
PKSDEKPAEPANNEQGAPSGPEDAAPAPAPAPIINTFSDTQLRMLVQRLRQRTAQFREKLIDKDASSPEPSPP  
TPIKPKPEKKEEKKEEKKDEKKDEKKDEKKDDAKVEEVKPEEEHYCNMLCCKFKTKPLKDKFKYQLPD  
SLDEFTDRRYIFWLFVVTLAFNYNCWFVPIRMVFPYHTDRSIPIWIFFDLLADVIYIVDILVFQTRLQFIRGGD  
IYDKEEIKKHYSRSLKFTNDILSVLPFDLLYLKFGFKSVFRVNRFLKHESFFDFNDRLESIMSKAYIYRVIRTT  
GYLLYILHLNACLYYAASFYEGIGSTKWVYDGDGNEYLRCCYWA VRTLITIGGLPEPVTVF EIVFQLLNYFT  
GVFVFSLLIGQMRDVIGAATAGQTYFRASMDNTVSYMNTYKIPRQVQNRVRTWYNYTWDSQGMLDESEL  
LEQMPTVMRTAIAVDVNFSTVSKIELFKGCDNQMLVDMLLRLKSIVYLPGDYVCKKGEIGREMYIIKQGEV  
QVLGGPDGTVLVTLRTGAVFGEISLLAASGGNRRTANVVAHGAFANLFILDKKDLNDILVHYPDSQKVLRSR  
KGRKLMKDKGKKAGPVEERQKGNALFTTRPPTPKLFRLLNARGKGVFGNFKGAS\*

>KT749740\_CNGBX\_G.\_australis\_58615-1-2

MFRRLRGLSLCRVAPLLTPDGDSSPTQANGKDDQNPPNSNASPTPESKACGQPSDAQAQSSTSPEGAGAKEA  
PIPNQPLPSSTATPGCAQEQINDEREDKEVAEKSLADPLMMELDAERQAHIRDLVERFRLRMETMKEHIMD  
PDASSPEPSPEPSPIKKAPAQAPPPPPVKEEEKKEETAPEVTPDQCEMLCCRFRKQRPWMEKFKKLLKIPQTI  
DACSDKIYLMWMLVTLAFHWSCWLLPLRLSFPVHTPNTMFFWYIGDYTCDAIYLFILVMQRRLQFVNR  
GDIKDQKETSCHYHSEKFKSDLVSLPLDILYLKFGPSALFRLPRLVKYNAFFEFNDRLEANLDKAYIYRV  
IRTTGYLLYSLHLNACLYYFVSDMEGLGSTRWVYDGGKGNRYVRCYWA VVKTLITIGGLPEPSNILEIVFQL  
CNYFLGVFVFSIMIGQMRDVIGAATAGQNYRACMDNTLGYMGMNIPRAIQNRVRMWYEYTWASQGM  
LDESELDDKLPKMRLEIAIDVNYTIVSKVDLFGKCDRQMIYDMLLRLKSIVYLPGDFVCKKGEIGREMYII  
KAGEVQVVGPDNKIVFVTLKAGAVFGEISLLAVGGNRRTANVMAHGAFANLFILDKRDLTEILRIYPESE  
KLLRKKAKKLLSKDKNKATGDAAPVVRGFASIFPEKPPTPKFLRLIQMASRNAAKNKQM\*

>KT749741\_CNGBX\_M.\_mordax\_39552-1-3

MFRRLRGLSLSKVAPILTPDEDSSSTEANGKDGNSPNSSTSPTPESKACDQPSDAQAQSSTSSESSG  
GAAEEDPDTCVPLPPSAATARSAREQTHDEREDKEVDEEGPADPSNLKLNPEVEQHIRNLLERFRTRTEIMR  
EHIMDPDASSPECSPEPSPKKTPSKAPPPPVKEEAKKEEV APEATTEQHECKMLCCRFRKRRPWMEKLNK  
LRLPQTIDPCADRIYLIWMMLVTLAFQWNCWILPLRLSFPMHTPDAMFFWYTVDYTCDAIYLLDILMKRR  
LQLVHKGDIITDPKETAKFYRSKTFKWDLALLPLDILYFKFGPSAMFRLFRLLIKYHSFLEFNARLEATMG  
KPYIYRVIRTTGYLLFSLHINACLYYFVSDMEGLGSTRWVYDGGKGRYTRCYWA VVKTLITIGGLPEPSNV  
FEIIFQLCNYFLGVFVFSIMIGQMRDVIGSATAGQNHYRACMDSTMQYMITNKIPRAVQNRVRMWYEYTW  
TAQGMLDESELDDKLPKMRLEIAIDVNYDIVSKVDLFGKCDRQMIYEMLLRLKSIVYLPGDFVCKKGEIG  
REMYIIKEGEVQVVGPNKIVFVTLKAGSVFGEISLLAAGGGNRRTANVMAHGFTNLFILDKRDLTEILR  
AYPESQKLLRKKAKKLLAKDKVKNTGNAAPVAKGFANIFARKSETPKLLRLVRMMKLNEQK\*

>KT749742\_CNGBY\_E.\_cirrhatus\_138315-3-2

MARTTPTAASARTTPKAASARTTPPAAAHTISTAASTRTKRATASKLTKLPAGSTHTTLPVISTRIKVAAP  
TGMKELTRTPQASSILNSPPSESTRTTLQVPSTHTTLPKLSILPLATSTYSAQSLASPGTLQPPPAFSSRSHL  
PPGSSQDGFNPAFSPDSPVQQVTIVEQPSASVKSVDSEGEV GADAESDGALNLIHASQGSHTARHSLTVPS  
QTPQANSLQESEASMNNSESNENSSFRSATPAQVTKQLSKLTQRLRSRTATVKQRIFHSDESSTESSSDSTV  
KKIKPVIKEEPPTKQAPQVPTAPSLDPGIDGGSTRRTWHFHRPHIPASIDPYTDHIYVLWFLVTLAFNWNM

WMVPMRAAFPLGQNGPWALWFTGDYVSDALYLGDILLQPRQLQFVHYGDIITDKKEMKKNYLHSLRKF  
DVVSLPLDLLYFVVGFNPLLRIPRFLKFWTFFEFNDRLEAILSKAFIYRVIRTTCYLLYTLHLNACLYYWAS  
NYEENKASVWTYDGEKNHYIRCYFAVKSLLTIGGLPDPTSLFEISFQLLNFLYVFAFSVIIGQMRDVIGA  
ATAAKTHYRTSMDGALAYMASYSIPRAVQNRVRSWYEYTWASQGMLEDEMELLEQIPAKMQLDIAIDVNF  
DIVSNVELFKGCDTQMIYDMLVRLRSVVYLPGDFVCKKGEIGREMYIISGVSQVLGGPDGRLVLTLRGT  
CVFGEISLLAVGGGNRRTADVVAHGFTNLFILEKKDLHSILHYYPDSQRLLRKKAKRLLSKGTKGPKKKAK  
KRPEPIPPRPTPVLFVMMMSVANHSGLLGRMLQRAKRGEVVAPEVPMPTKPLHSQSPSPVHQHSPSHR  
RLEPPHGSDEEVSNMSDQSLTIHVAHSSSGDDDQLTVGTGDEGGPNKAKGPGD\*

>KT749743\_CNGBY\_G.\_australis\_55649-1-1

MVNPVDHAGDSGPSAWLAGPRGLAARLVWTLRRGRVGPADVSPRSPQPEGLAQQGAIKSASSEDRAI  
GTVSTAQERQSGAGPSRPSVRVGHVACDDHDGPPGPVAMPGLAFSTLPPAASPQQAGGSQPSHTLAVPTA  
SSRRKFSSPTSSVDEASQHTGDEQVDFQSPSHSRARADSLTSQCSVSVTERLHEISRQFRSRTQEVKERIIDP  
DESLSDTSPPPSPAKVAPVTPTPAEGEAKGEAGGQPDGQQQQQEDLGYACHMLCCKLRPWRRLRIPK  
SIDPYTDHFYVLWLLVALAFHWNCWLIPVRCTFPYVTAGNLAAWLAADYACDAVYVVDMAFFQTRLQF  
ISNGDIITDPKEMRKNYMKSRQFKMDMLSLIPLDLLYLQFGFNPLFRLPRCLRYMAFFEFNDRLEAILTKAFI  
YRVIRTTGYLLYSLHLNACLYYWASDYEGIASTKWVYNGLGNHYIRCYFWAIKTLITIGGLDPENLFEIIFQ  
GCNYFTGVFAFSVLIGQMRDVIGAATASKTRYRDCVDSTVA YMNANRIPKYVQNRVVRTWYQYTWQALG  
MLDESELDDQMPAKMRLDIAVDVNYQIITNVQLFKGCDKQLLQDMLVRLKSVVYLPGDYVCKKGEIGKE  
MYIISGSEVQVLGGPNGMTVLVTLKAGAVFGEISLLSVGGGNRRTANVVAHGAFANLFILNKQDLNEILHY  
PESQRLLRKKAKKLMSSNKEKKAPPRKPHTRPLLQAKQETPKIIRTILAAARNSGLRGTFRLRNHNKPS  
TQPDVLPASLAASPAASPAPRAASPPDPPQEGSGPRHPTTTVEEDEEDLSEWSDQSTS RVPVHRPAEEAS  
TPRARSGARGREAGD\*

>KT749744\_PDE6G\_E.\_cirrhatus\_60367-1-1

MSGGGGILAPTKVTGGPVTPRKGPCKFKQRQTRQFKSKPPKKGIIQGGFGDDIPGMEGLGTDITVICPWEAFSH  
LELHELAQFGIV\*

>KT749745\_PDE6G\_G.\_australis\_31619-1-1

MLTPTAVTDPTSHRQHQLASSAASSTASASSQKKGSRERLKGVKKGTRVGD MNLAAANTSGALMAP  
TKVSGGPATPRRGPPKFKQRQTRQFKSKPPKKGIIQGGFGDDIPGMEGLGTDITVICPWEAFNHLELHELAQYG  
II\*

>KT749746\_PDE6G\_Bluespot\_ray\_30603-2-1

MAANPLEIQPNLKAQEMALTLEPPKPAGEIKSATRVTTGGPATPRKGPPKFKQRQTRQFKSKPPKKG VQGF  
DDIPGMEGLGTDITVICPWEAFSHLELHELAQYGII\*

>KT749747\_PDE6G\_Bamboo\_shark\_28892-1-1

MAANPLEIQPNLKAQEMALSLEPPKPLGEIKSATRVTTGGPATPRKGPPKFKQRQTRQFKSKPPKKG VQGF  
DDIPGMEGLGTDITVICPWEAFNHLELHELAQYGII\*

>KT749748\_PDE6G\_Reef\_shark\_36679-1-1

MAANPLEIQPNLKAQEMALSLEPPKPAGEIKSATRVTTGGPATPRKGPPKFKQRQTRQFKSKPPKKG VQGF  
DDIPGMEGLGTDITVICPWEAFNHLELHELAQYGII\*

>KT749749\_PDE6G\_Florida\_gar\_30259-1-3

MNLEPPKPEIKSATRVSSGGPATPRKGPPKFKQRQTRQFKSKPPKKGIIQGGFGDDIPGMEGLGTDITVICPWEAF  
SHLELHELAQFGIV\*

>KT749750\_PDE6G\_Florida\_gar\_30259-2-2

MNLEPPKPEIKSATRVSSGGPATPRKGPPKFKQRQTRQFKSKPPKKGIIQGGFGDDIPGMEGLGTDITVICPWEAF  
SHLELHELAQYGII\*

>KT749751\_PDE6G\_Bowfin\_23402-2-1

MNLEPPKSEVKSATRVTTGGPATPRKGPPKFKQRQTRQFKSKPPKKG VQGFDDIPGMEGLGTDITVICPWE  
AFSHLELHELAQYGII\*

>KT749752\_PDE6H\_G.\_australis\_57194-6-2  
MSETPNTLAAPESHVGPPTPKKGPPKFKQRATRQFKSKPPKPGAKGFGDDIPGMEGLGTDITVICPWEAFSH  
LELHELAQYGIV\*

>KT749753\_PDE6H\_M.\_mordax\_36958-1-1  
MSANTSNSLAAPVSHVGPPTPKKGPPKFKQRATRQFKSKPPKPGAKGFGDDIPGMEGLGTDITVICPWEAFS  
HLELHELAQYGIV\*

>KT749754\_PDE6H\_Bluespot\_ray\_36371-5-1  
MNAISAPTKTAGGPTSPRKGPPKFKQRATRQFKSKPPKAGVKGFGDDIPGMEGLGTDITVICPWEAFSHLEL  
HELAQYGIV\*

>KT749755\_PDE6H\_Bamboo\_shark\_56213-1-1  
MNISPTNISGGAMSPRKGPPKFKQRATRQFKSKPPKAGVKGFGDDIPGMEGLGTDITVICPWEAFSHLELHE  
LAQYGIV\*

>KT749756\_PDE6H\_Reef\_shark\_2117-1-1  
MSAITPPTNTSRGPISPRKAPPKFKQRATRQFKSKPPKAGVKGFGDDIPGMEGLGTDITVICPWEAFSHLELH  
ELAQYGIV\*

>KT749757\_PDE6H1\_Bowfin\_22156-1-1  
MNITTNTSNPTTPHTVTGGATTTPRKGPPKFKQRQTRQFKSKPPKKGKIKGFGDDIPGMEGLGTDITVICPWEA  
FSHLELHELAQFGII\*

>KT749758\_PDE6H2\_Bowfin\_598-1-1  
MNAQPPAGSALSAPAPIEAGATPKKGPPKFKQRQTRQFKSKPPKKGKIKGFGDDIPGMEGLGTDITVICPWEA  
FSHLELHELAQFGIV\*

>KT749759\_PDE6I\_Florida\_gar\_30259-1-1  
MNISVNPTTPTKVTGGPTTPRKGPPKFKQRQTRQFKSKPPKKGVKGFGDDIPGMEGLGTDITVICPWEAFSH  
LELHELAQFGIV\*

>KT749760\_PDE6I\_Florida\_gar\_30259-1-4  
MNISVNPTTPTKVTGGPTTPRKGPPKFKQRQTRQFKSKPPKKGVKGFGDDIPGMEGLGTDITVICPWEAFSH  
LELHELAQFGII\*

>KU748578\_HSP90\_G.\_australis\_53735-1-1  
MPGETTGPTMDEETETFAFQAEIAQLMSLIINTFYNSKEIFLRELISNSSDALDKIRYESLTDPSKMDSGKELK  
IDVIPNRNERTLTINDTGIGMTKADLNNLGTIAKSGTKAFMEALQAGADISMIGQFGVGFYSAYLVAERVS  
VVTKHNDDEQYLWESSAGGSFTVRLDSGESIGRGTIKIVLHLKEDQSEYLEEKRIKDIVKKHSQFIGYPITLFV  
EKERDKEVSDDEAEKEEKEEKEEKEAETEDDKPKIEDVGSDDDEADKEGEKDKKKKKKIKEKYVDKEELN  
KTKPLWTRNPDDITQEEYGEFYKSLTNDWEDHLAVKHFSVEGQLEFRALLFVPRRAPFDLFENKKKKNNIK  
LYVRRVFIMDNCELDIPEYLNFIKGVVDSIDLPLNISREMLQQSKILKVIKKNIVKKCMELFTGLAEDKENY  
KKFYEQFSKNMKLGIHEDSQNRKRLSEMLRYHTSVTGEDVCSLKEYVSRMKENQKHIYYITGESKEQVSNS  
AFVERVRKRGLEVYVMTPEIDYCVQQLKEFDGKTLVSVTKEGLELPEDEDDKKKQEEAKAKYENLCKV  
VKEILDKKVEKVTVSNRLVASPCCIVTSTYGTANMERIMKAQALRDSSTMGYMAAKKHLEINPEHPIVET  
LRQKAEADKNDKSVKDLIILLFETALLSSGFSLDDPQTHSNRIYRMIKLGLGIDDDEPIPDETTPSVAEEMPPL  
EGDDATRMEEVD\*

>KU748579 EMC7\_G.\_australis\_51617-1-1  
LAGAVASSSSVASSSSVSFIEAEDANGERFKIEGRVSVLGLKVPPEWVSGAQVLVEGGEYSGLLRDGSFTVH  
NVPSGSYVVEVASPSFKFDPVRVDITSKGKIRARKLNYIKSSEVVPLPYPLRVSLGSPNYFMKRETWKWTD  
FLFNPMLVMMALPLLIVFLPKVMNTNDPEMRKEMEQQSMNMLTPNKDLPDVSELMTRIFTTKKPKVSSSST  
KVSKPGPVKRR\*

>KU748580\_G6PI\_G.\_australis\_43341-1-1  
MAGLTSDPAWKRLGEWHGKHSASLKMQRQLFDKDPERFAKFSLLLNTDGGELLLDYSKNLITPEVMGLLLD



LARSRGIEKARDRMFSGEKINFTEENRAVLHVALRNRSNKPMVVDGKDVMPDVNAVLDKMRGFCERVRS  
QWKGYSKAITDVVNIGIGGSDLGPLMVTEALKPYSKGGPNSWFVSNIDGTHMAKTLAVLDPETTLFIAS  
KTFTTQETITNAESAKEWFLKKAGDPAAVAKHFVALSTNGAKVKAFGIDTNMFEFWDWVGGRYSLWSA  
IGLSIALHIGFDNFEQLLSGAHWMDNHFCSAPLEKNAPVLLALLGVWYGNFYNAETHALLPYDQYMHRFA  
AYFQQGDMESNGKYITSSGRRVDYSTGPIVWGEPTNGQHAFYQLIHQGTRMIPADFLIPAQTQHPIRDGL  
HHTILLANFLAQTEALMKGKTTEEARGELQAAGLKGDALDKLLPHKVFEGNRPTNSIVFDKLTFFMLGALI  
AMYEHKIFIQGVIVEVNSYDQWGVVELGKQLAKAIEPELSSSGEVTSHDSSTNGLIGFIKQHRQ\*

>KU748581\_SNRPD3\_G.\_australis\_90835-1-1

MSIGVPIKVLHEAEGHIVTCETNTGEVYRGKLVEAEDNMNCQISNVTVTFRDGRVAQLEHVYIRGSKIRFLI  
LPDMLKNAPMLKSVKNKNPSAGAGRGKAAILKAQVARGRGRGGFSRGNIFQKRR\*
